# Supplementary material for: Unsaturated amido-substituted six-vertex mixed silicon germanium clusters
Source: Royal Society of Chemistry journal article supplement (doi:10.1039/d2dt01746f), 2022-01-01
Supplement: d2dt01746f1.pdf [file d2dt01746f1.pdf]

## **Supporting Information**

**for**

### **Unsaturated Amido-Substituted Six-Vertex Mixed Silicon Germanium Clusters**

**Joschua Helmer,<sup>[a]</sup> Jörn Droste,<sup>[b]</sup> Michael Ryan Hansen,<sup>[b]</sup> Alexander Hepp,<sup>[a]</sup>  
Felicitas Lips<sup>[a]\*</sup>**

Westfälische Wilhelms-Universität Münster

[a] Institut für Anorganische und Analytische Chemie, Corrensstraße 28-30, 48149 Münster,  
(Deutschland)

[b] Institut für Physikalische Chemie, Corrensstraße 28-30, 48149 Münster, (Deutschland)

#### **Table of content**

1. Supplementary data for **1** (S1 – S3)
2. Supplementary data for **2** (S4 – S8)
3. Supplementary data for **3** (S9)
4. X-ray crystallographic data and collection parameters for **1-3** (S10 – S18)
5. Quantum chemical investigation of different isomers of clusters Si<sub>4</sub>Ge<sub>2</sub>, Si<sub>3</sub>Ge<sub>3</sub> and Si<sub>2</sub>Ge<sub>4</sub> (S19)
6. Results from <sup>29</sup>Si{<sup>1</sup>H} CP/MAS NMR spectroscopy of **1** and **2** and calculated NMR chemical shifts of mixed silicon germanium clusters present in **1** and **2** (S20 – S23)
7. NMR spectroscopy of **1** and **2** in solution (S24 – S35)
8. TDDFT calculations of Si<sub>4</sub>Ge<sub>2</sub>, Si<sub>3</sub>Ge<sub>3</sub>, Si<sub>2</sub>Ge<sub>4</sub>, Si<sub>6</sub> and Ge<sub>6</sub> model compounds with N(SiH<sub>3</sub>)CH<sub>3</sub> substituents (S36 – S52)
9. Cartesian coordinates of all calculated structures (S53 – S90)
10. References (S91)

# 1. Supplementary data for $[\text{Si}_{3.72}\text{Ge}_{2.28}\{\text{N}(\text{SiMe}_3)\text{Dipp}\}_4] (1)$

EI-MS

\\aac.wwu.de\dfs\...helmer034\_1  
study[Ag-Lips]

15.01.2019 16:02:38

034.1

EI+ 20eV / 210°C

helmer034\_1 #29 RT: 2.52 AV: 1 NL: 5,10E7  
T: + c EI Full ms [33,00-1400,00]

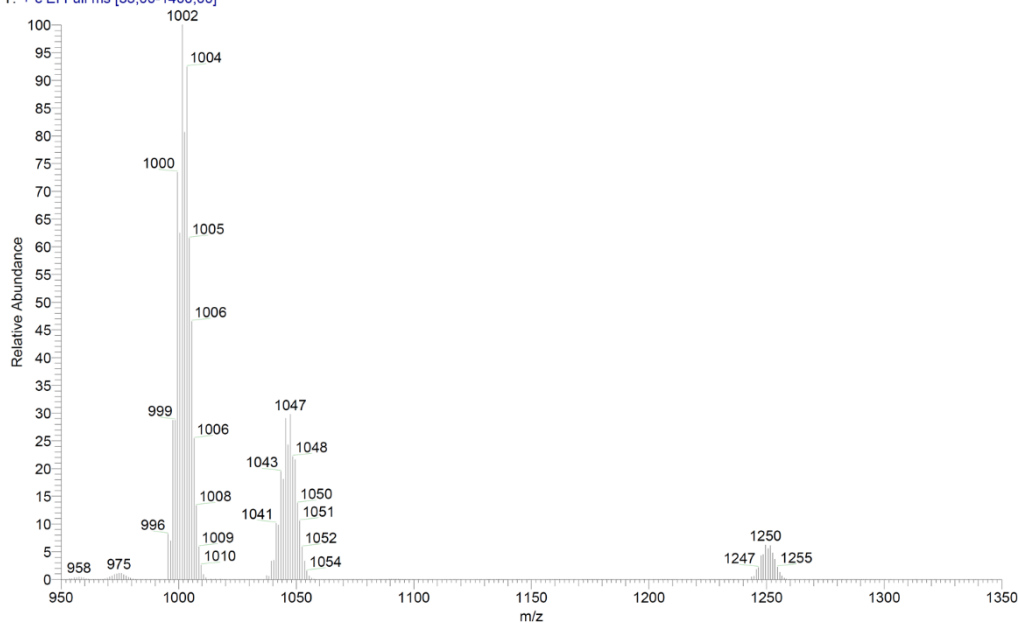

Figure S1. EI-MS spectrum of  $[\text{Si}_{3.72}\text{Ge}_{2.28}\{\text{N}(\text{SiMe}_3)\text{Dipp}\}_4] (1)$ .

HAH\_0704\_8JH-104a\_190703143115

7/4/2019 9:20:30 AM

sample in THF

Orbitrap XL Organisch Chemisches Institut WWU Muenster

HAH\_0704\_8JH-104a\_190703143115 #5-131 RT: 0.53-2.56 AV: 105 NL: 1.33E5

T: FTMS + p NSI Full ms [400.00-1500.00]

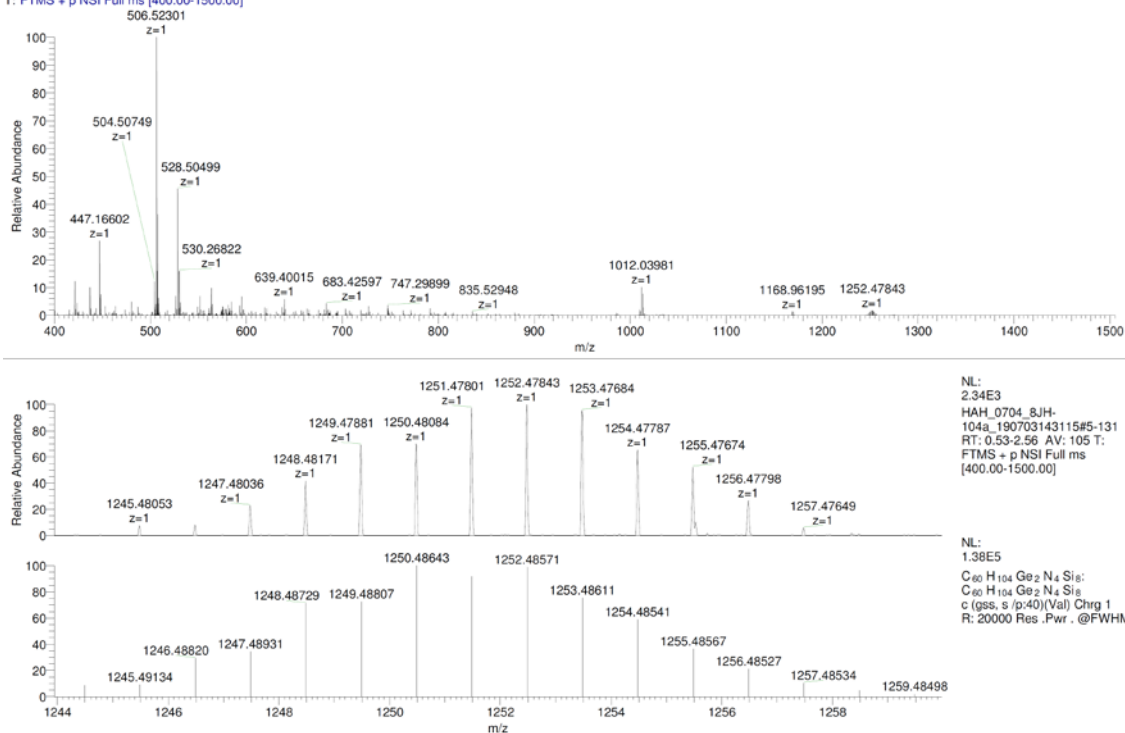

Figure S2. ESI-MS spectrum of  $1$  with zoom into the  $\text{Si}_4\text{Ge}_2\text{R}_4$  cluster.

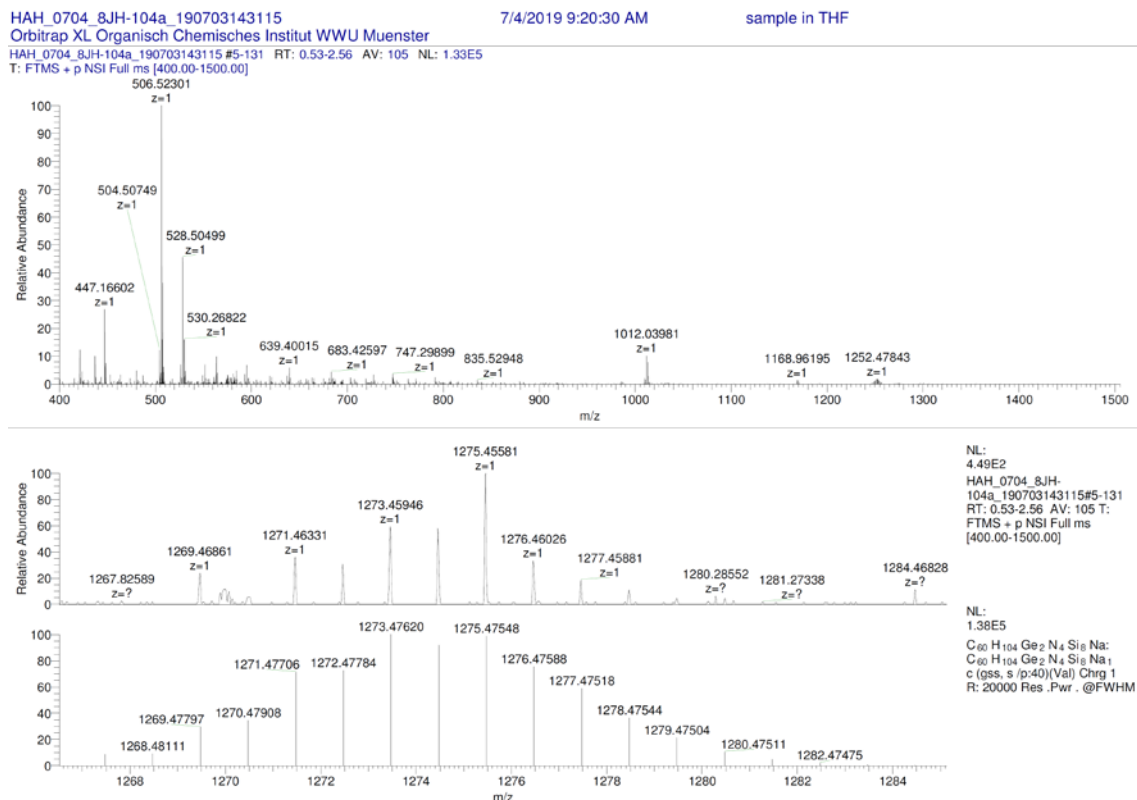

Figure S3. ESI-MS spectrum of **1** with zoom into the Si<sub>4</sub>Ge<sub>2</sub>R<sub>4</sub> cluster anion.

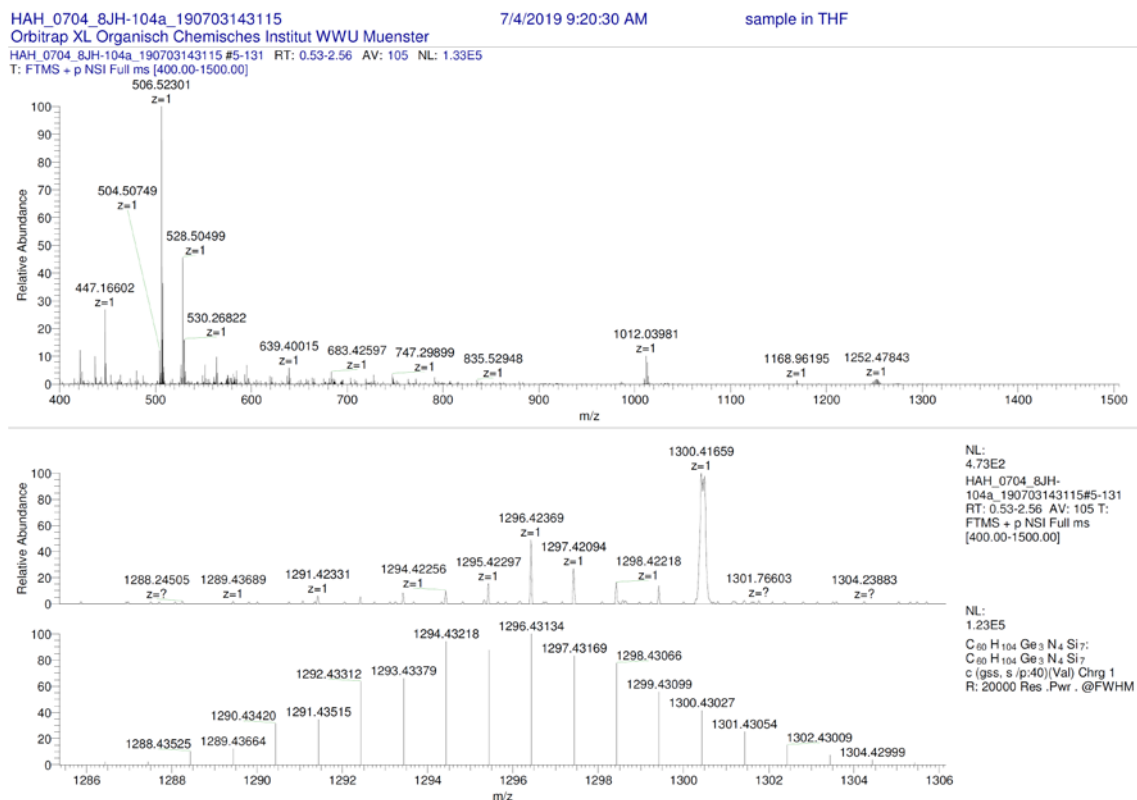

Figure S4. ESI-MS spectrum of **1** with zoom into the Si<sub>3</sub>Ge<sub>3</sub>R<sub>4</sub> cluster.

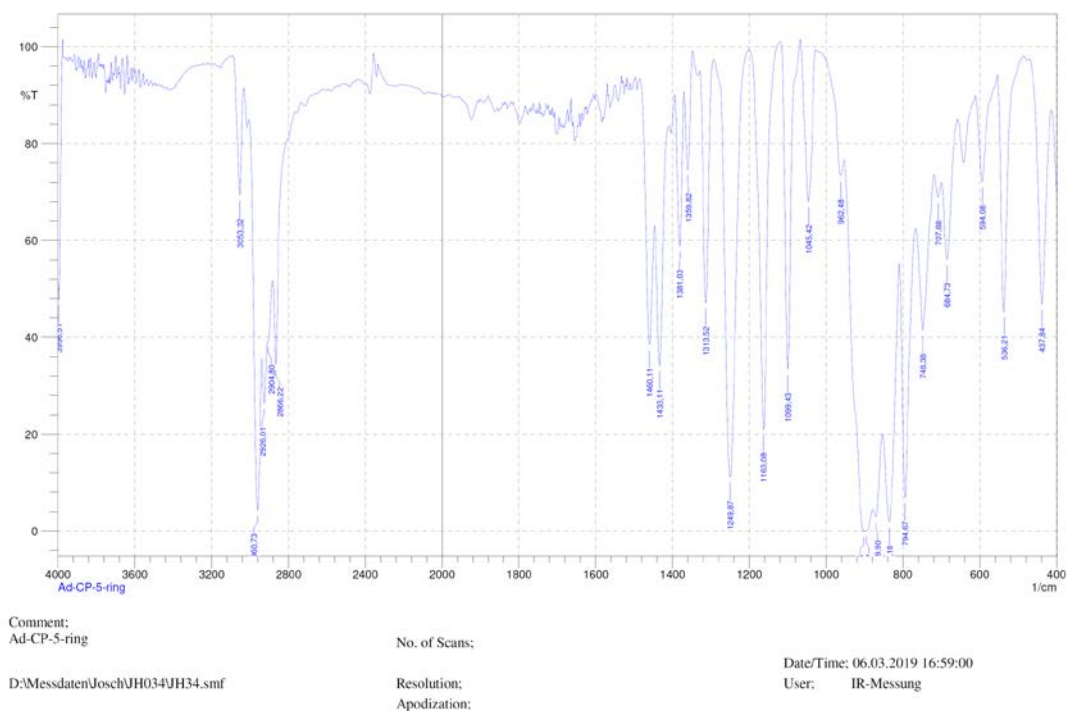

Figure S5. IR spectrum of  $[\text{Si}_{3.72}\text{Ge}_{2.28}\{\text{N}(\text{SiMe}_3)\text{Dipp}\}_4]$  (**1**).

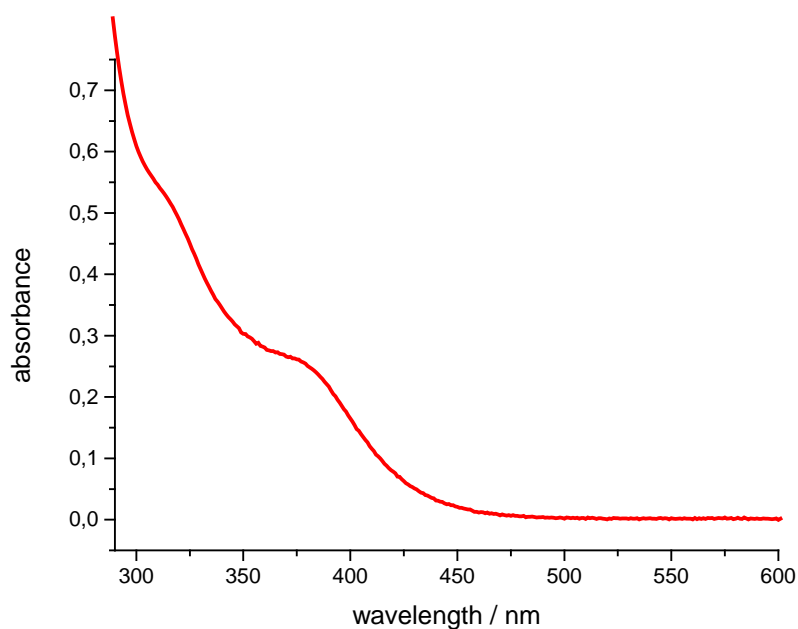

Figure S6. UV/Vis spectrum of  $[\text{Si}_{3.72}\text{Ge}_{2.28}\{\text{N}(\text{SiMe}_3)\text{Dipp}\}_4]$  (**1**)

## 2. Supplementary data for [Si<sub>3.10</sub>Ge<sub>2.90</sub>{N(SiMe<sub>3</sub>)Dipp}<sub>4</sub>] (2)

\\iaac.wwu.de\dfs\...helmer\_033\_1  
study[Ag-Lips]

16.01.2019 15:57:40

033.1

EI+ 20eV / 80°C

helmer\_033\_1 #29 RT: 2.46 AV: 1 NL: 1.00E7  
T: + c EI Full ms [33,00-1350,00]

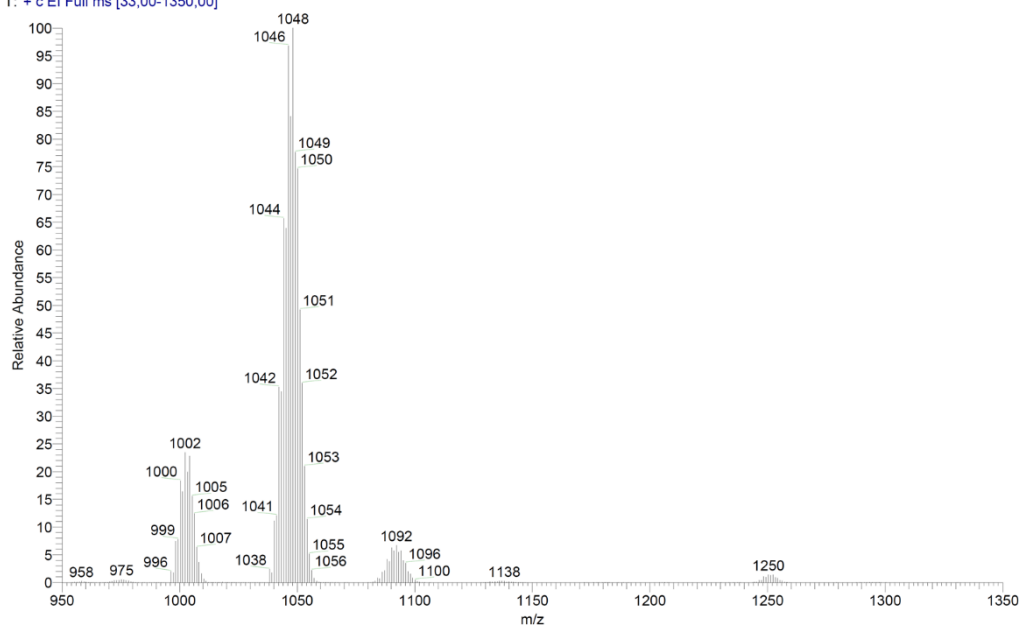

**Figure S7.** EI-MS spectrum of [Si<sub>3.10</sub>Ge<sub>2.90</sub>{N(SiMe<sub>3</sub>)Dipp}<sub>4</sub>] (2).

HAH\_0704\_8JH-077a\_190703143115

7/4/2019 9:53:02 AM

sample in THF

Orbitrap XL Organisches Institut WWU Muenster

HAH\_0704\_8JH-077a\_190703143115 #18-409 RT: 0.19-4.83 AV: 392 NL: 3.22E5

T: FTMS + p NSI Full ms [500.00-2000.00]

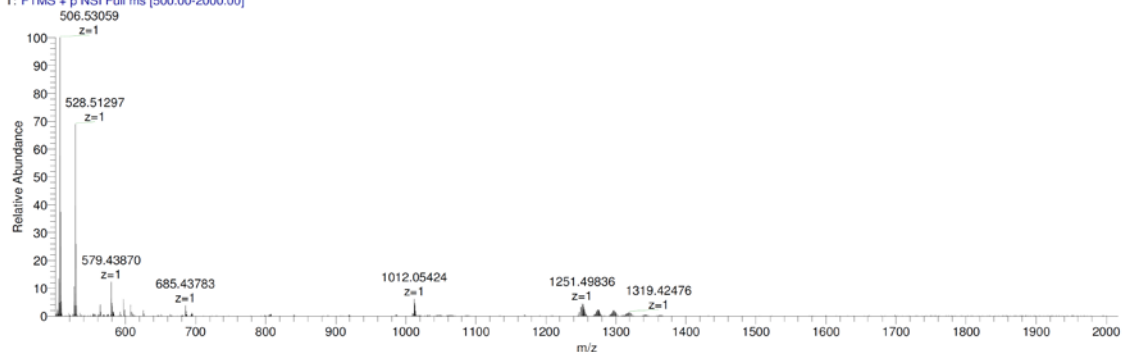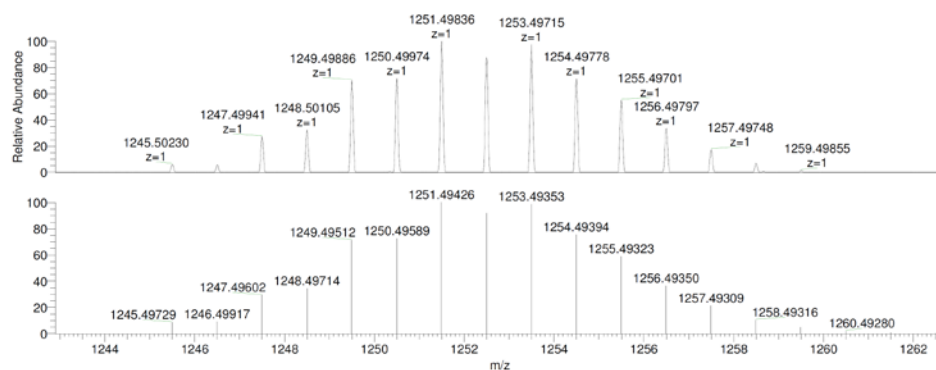

NL:  
1.46E4  
HAH\_0704\_8JH-  
077a\_190703143115#18-409  
RT: 0.19-4.83 AV: 392 T:  
FTMS + p NSI Full ms  
[500.00-2000.00]

NL:  
1.38E5  
C<sub>60</sub>H<sub>104</sub>Ge<sub>2</sub>N<sub>4</sub>Si<sub>8</sub>H:  
C<sub>60</sub>H<sub>105</sub>Ge<sub>2</sub>N<sub>4</sub>Si<sub>8</sub>  
c (95s, s (p/40)(Val) Chrg 1  
R: 20000 Res. Pwr. @FWHM

**Figure S8.** ESI-MS spectrum of 2 with zoom into the protonated Si<sub>4</sub>Ge<sub>2</sub>R<sub>4</sub> cluster.

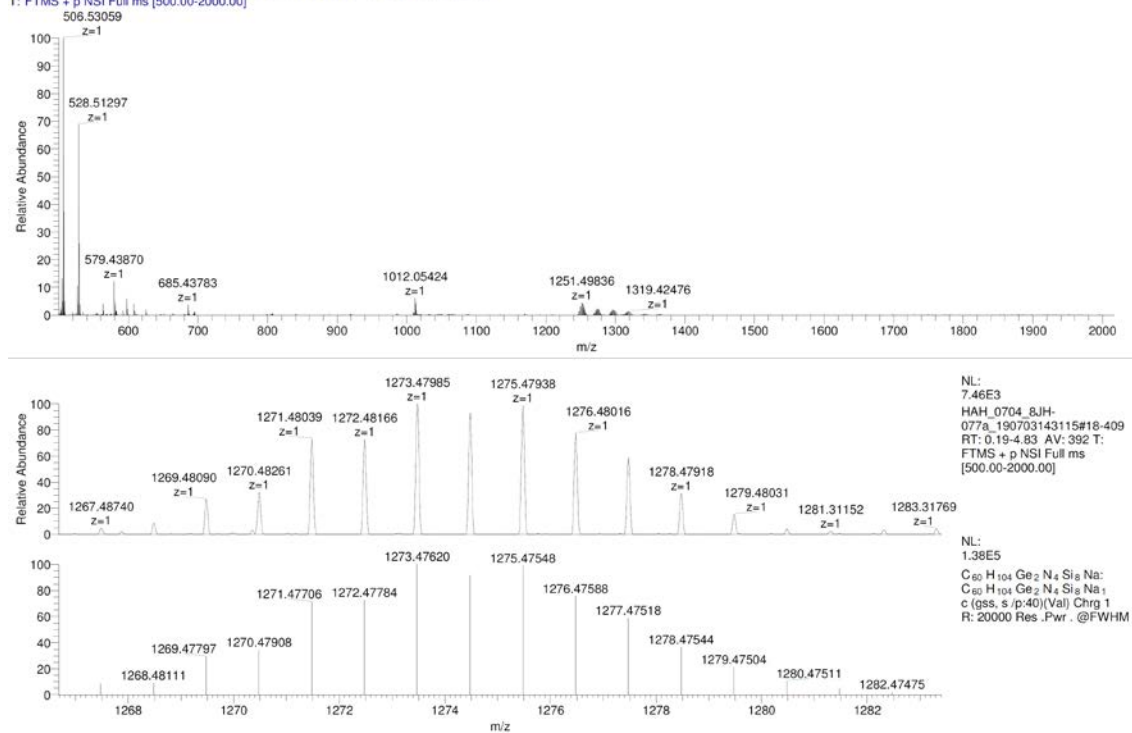

Figure S9. ESI-MS spectrum of **2** with zoom into the Si<sub>4</sub>Ge<sub>2</sub>R<sub>4</sub> cluster anion.

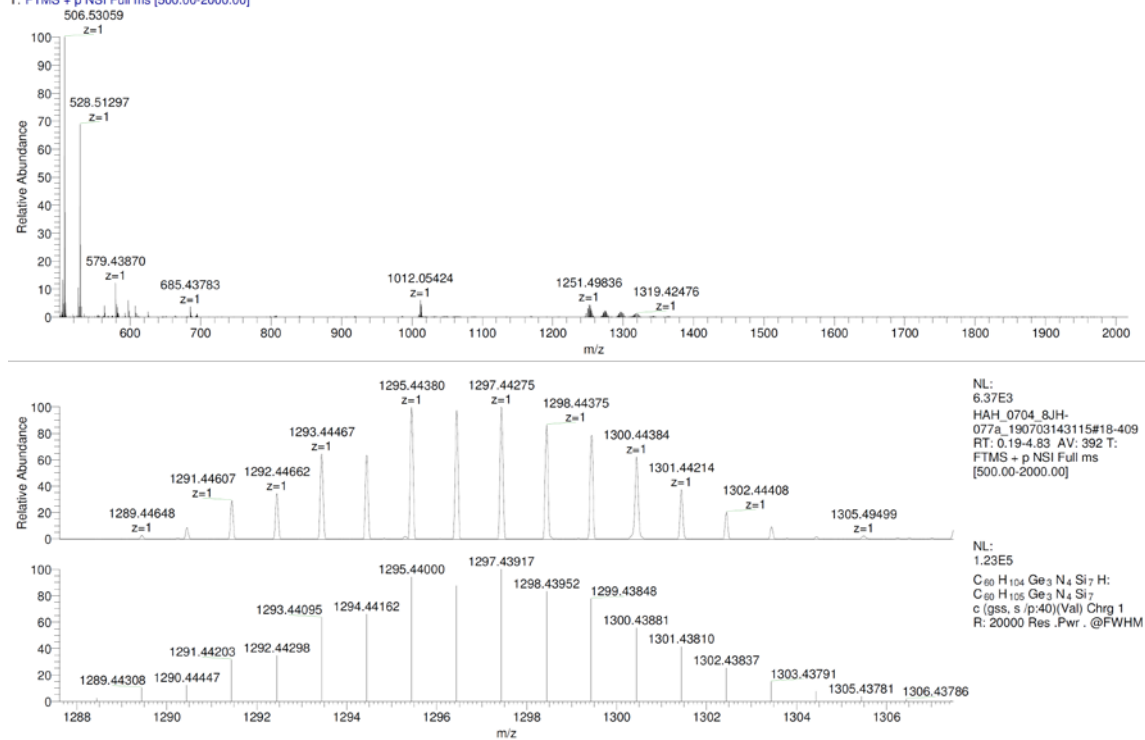

Figure S10. ESI-MS spectrum of **2** with zoom into the protonated Si<sub>3</sub>Ge<sub>3</sub>R<sub>4</sub> cluster.

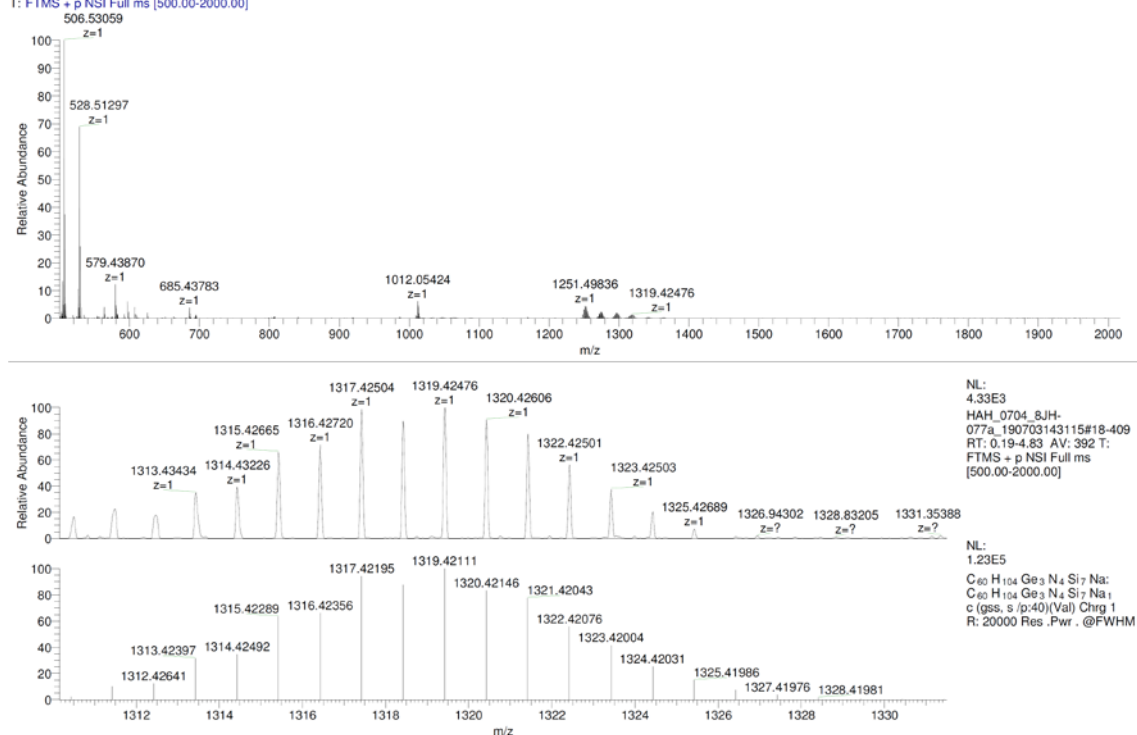

Figure S11. ESI-MS spectrum of **2** with zoom into the  $Si_3Ge_3R_4$  cluster anion.

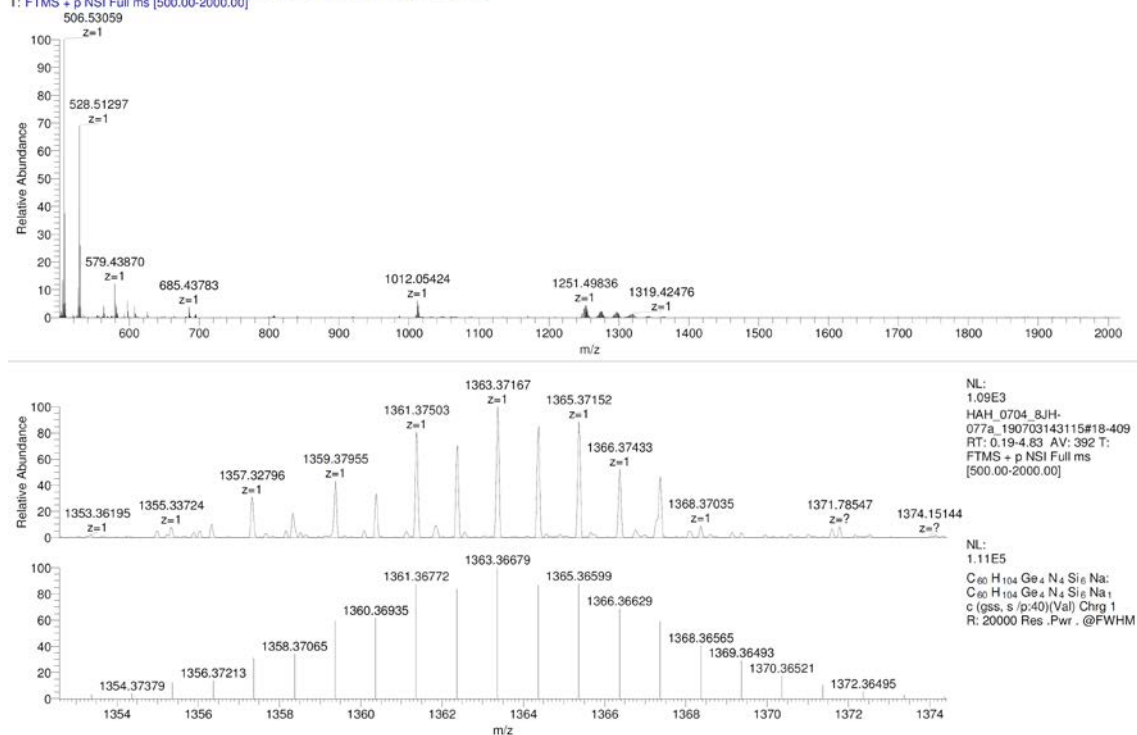

Figure S12. ESI-MS spectrum of **2** with zoom into the  $Si_2Ge_4R_4$  cluster anion.

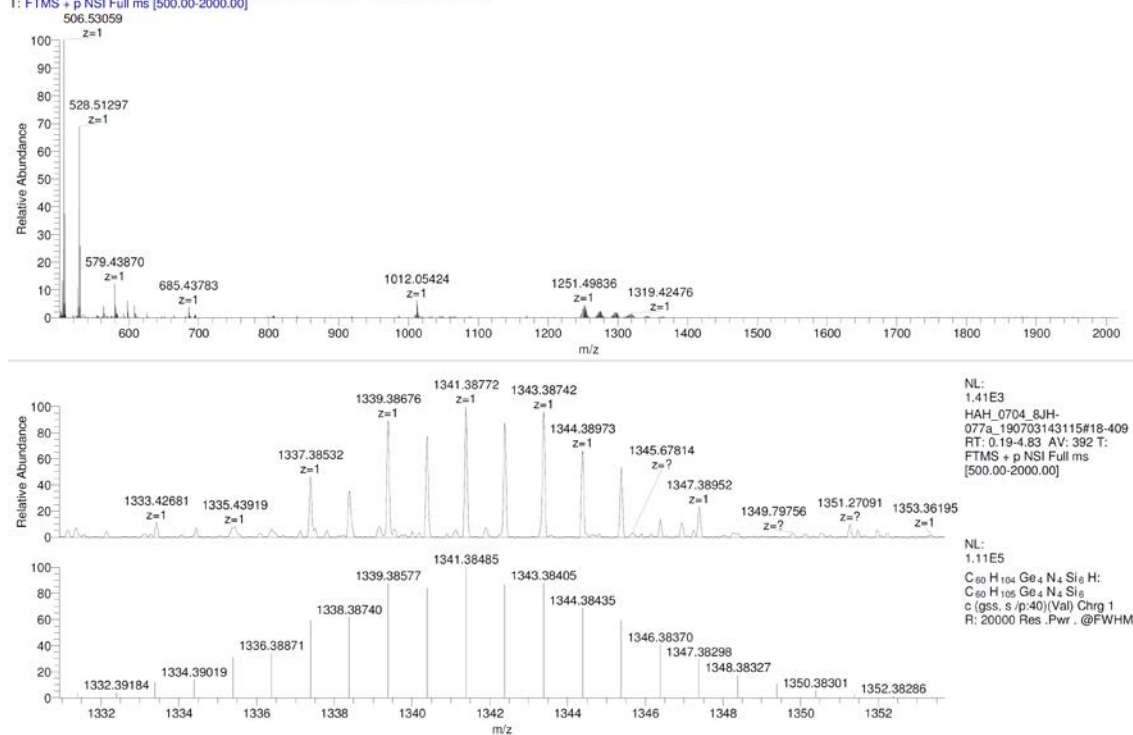

Figure S13. ESI-MS spectrum of **2** with zoom into the protonated Si<sub>2</sub>Ge<sub>4</sub>R<sub>4</sub> cluster.

SHIMADZU

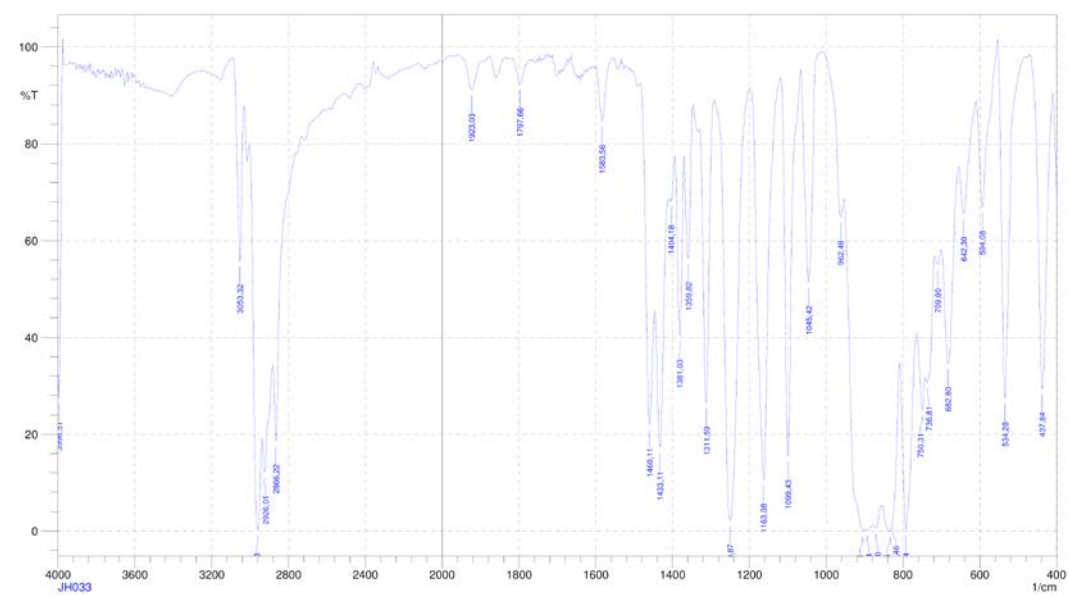

Comment:  
JH033

No. of Scans:

D:\Messdaten\Josch\JH033\JH0331\_1.smf

Resolution:  
Apodization:

Date/Time: 06.03.2019 17:28:53  
User: IR-Messung

Figure S14. IR spectrum of [Si<sub>3.10</sub>Ge<sub>2.90</sub>{N(SiMe<sub>3</sub>)Dipp}<sub>4</sub>] (**2**).



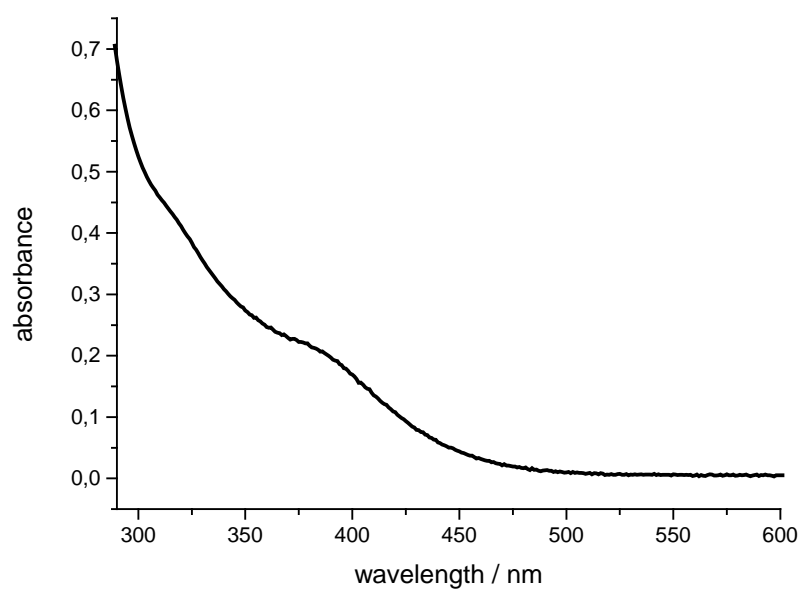

**Figure S15.** UV/Vis spectrum of [Si<sub>3.10</sub>Ge<sub>2.90</sub>{N(SiMe<sub>3</sub>)Dipp}<sub>4</sub>] (**2**).

### 3. Supplementary data for $[\text{Si}_{2.11}\text{Ge}_{3.89}\{\text{N}(\text{SiMe}_3)\text{Dipp}\}_4]$ (3)

\\iaac.wwu.de\dfs1...helmer056-1  
study\Ag-Lips]

23.01.2019 10:43:14

056.1

El+ 20eV / 80°C

helmer056-1 #26 RT: 2,24 AV: 1 NL: 2,37E7  
T: + c El Full ms [33,00-1400,00]

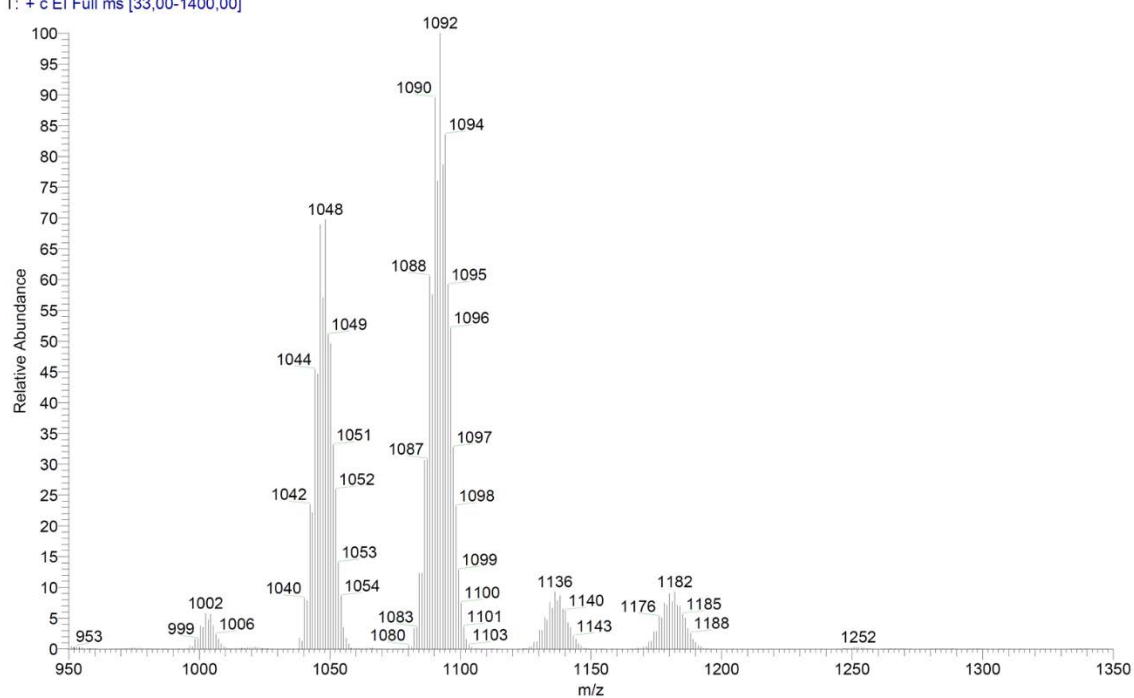

**Figure S16.** EI-MS spectrum of  $[\text{Si}_{2.11}\text{Ge}_{3.89}\{\text{N}(\text{SiMe}_3)\text{Dipp}\}_4]$  (3).

## 4. Details of the single crystal x-ray diffraction analysis

### 4.1. Refinement details

For **1**(·solvent), **2**(·solvent), **3**(·solvent) all positions of the six-vertex cluster core were refined with split positions and free refinement of the occupancy by silicon or germanium atoms using PART instructions. All three crystal structures were refined as two-component inversion twins and the Flack parameters are given in Table S1. Additionally, these crystal structures each contain 0.5 hexane solvent molecule per asymmetric unit which were treated with the Platon squeeze routine.<sup>[S1]</sup>

**Table S1.** Crystal data and structure refinement for **1**(·solvent), **2**(·solvent) and **3**(·solvent).

| Compound                                                    | <b>1</b> (·solvent)                                                                   | <b>2</b> (·solvent)                                                                   | <b>3</b> (·solvent)                                                                   |
|-------------------------------------------------------------|---------------------------------------------------------------------------------------|---------------------------------------------------------------------------------------|---------------------------------------------------------------------------------------|
| CCDC number                                                 | 2093200                                                                               | 2093201                                                                               | 2093202                                                                               |
| Empirical formula                                           | C <sub>60</sub> H <sub>104</sub> Ge <sub>2.28</sub> N <sub>4</sub> Si <sub>7.72</sub> | C <sub>60</sub> H <sub>104</sub> Ge <sub>2.90</sub> N <sub>4</sub> Si <sub>7.10</sub> | C <sub>60</sub> H <sub>104</sub> Ge <sub>3.89</sub> N <sub>4</sub> Si <sub>6.11</sub> |
| Formula weight /g·mol <sup>-1</sup>                         | 1263.60                                                                               | 1291.53                                                                               | 1335.47                                                                               |
| Crystal color, shape                                        | yellow, rod                                                                           | yellow, rod                                                                           | yellow, rod                                                                           |
| Crystal size /mm <sup>3</sup>                               | 0.176×0.289×0.584                                                                     | 0.170×0.194×0.566                                                                     | 0.140×0.201×0.388                                                                     |
| Crystal system                                              | tetragonal                                                                            | tetragonal                                                                            | tetragonal                                                                            |
| Space group                                                 | <i>P</i> -4 <sub>2</sub> <i>c</i>                                                     | <i>P</i> -4 <sub>2</sub> <i>c</i>                                                     | <i>P</i> -4 <sub>2</sub> <i>c</i>                                                     |
| <i>a</i> /Å                                                 | 16.3651(5)                                                                            | 16.3758(5)                                                                            | 16.3876(8)                                                                            |
| <i>b</i> /Å                                                 | 16.3651(5)                                                                            | 16.3758(5)                                                                            | 16.3876(8)                                                                            |
| <i>c</i> /Å                                                 | 27.0314(9)                                                                            | 27.0498(9)                                                                            | 27.0831(13)                                                                           |
| $\alpha$ /°                                                 | 90                                                                                    | 90                                                                                    | 90                                                                                    |
| $\beta$ /°                                                  | 90                                                                                    | 90                                                                                    | 90                                                                                    |
| $\gamma$ /°                                                 | 90                                                                                    | 90                                                                                    | 90                                                                                    |
| <i>V</i> /Å <sup>3</sup>                                    | 7239.5(5)                                                                             | 7253.9(5)                                                                             | 7273.3(8)                                                                             |
| <i>Z</i>                                                    | 4                                                                                     | 4                                                                                     | 4                                                                                     |
| <i>T</i> /K                                                 | 100(2)                                                                                | 100(2)                                                                                | 100(2)                                                                                |
| Completeness to $\theta$ 25.24° /%                          | 99.9                                                                                  | 99.9                                                                                  | 99.8                                                                                  |
| $\rho_{\text{calc}}$ /g·cm <sup>-3</sup>                    | 1.159                                                                                 | 1.183                                                                                 | 1.220                                                                                 |
| $\mu$ (Mo) /mm <sup>-1</sup>                                | 1.106                                                                                 | 1.348                                                                                 | 1.729                                                                                 |
| 2 $\theta$ range /°                                         | 4.64-54.34                                                                            | 4.63-54.39                                                                            | 3.90-54.27                                                                            |
| Reflections measured                                        | 91036                                                                                 | 92304                                                                                 | 85997                                                                                 |
| Independent reflections                                     | 8000                                                                                  | 8055                                                                                  | 8042                                                                                  |
| <i>R</i> (int)                                              | 0.0372                                                                                | 0.0401                                                                                | 0.0536                                                                                |
| Ind. reflections ( <i>I</i> > 2 $\sigma$ ( <i>I</i> ))      | 7813                                                                                  | 7822                                                                                  | 7658                                                                                  |
| Parameters                                                  | 339                                                                                   | 339                                                                                   | 343                                                                                   |
| Restraints                                                  | -                                                                                     | -                                                                                     | -                                                                                     |
| <i>R</i> <sub>1</sub> ( <i>I</i> > 2 $\sigma$ ( <i>I</i> )) | 0.0175                                                                                | 0.0179                                                                                | 0.0267                                                                                |
| <i>wR</i> <sub>2</sub> (all data)                           | 0.0493                                                                                | 0.0479                                                                                | 0.0641                                                                                |
| <i>Goof</i> (all data)                                      | 1.080                                                                                 | 1.030                                                                                 | 1.078                                                                                 |
| Max. peak/hole /e <sup>-</sup> ·Å <sup>-3</sup>             | 0.179 /-0.396                                                                         | 0.199 /-0.367                                                                         | 0.398 /-0.437                                                                         |
| Absorption correction type                                  | multi-scan                                                                            | multi-scan                                                                            | multi-scan                                                                            |
| Min. /Max. transmission                                     | 0.5839 /0.7455                                                                        | 0.5883 /0.7455                                                                        | 0.5539 /0.7358                                                                        |
| Flack parameter                                             | 0.021(7)                                                                              | 0.017(6)                                                                              | 0.055(9)                                                                              |

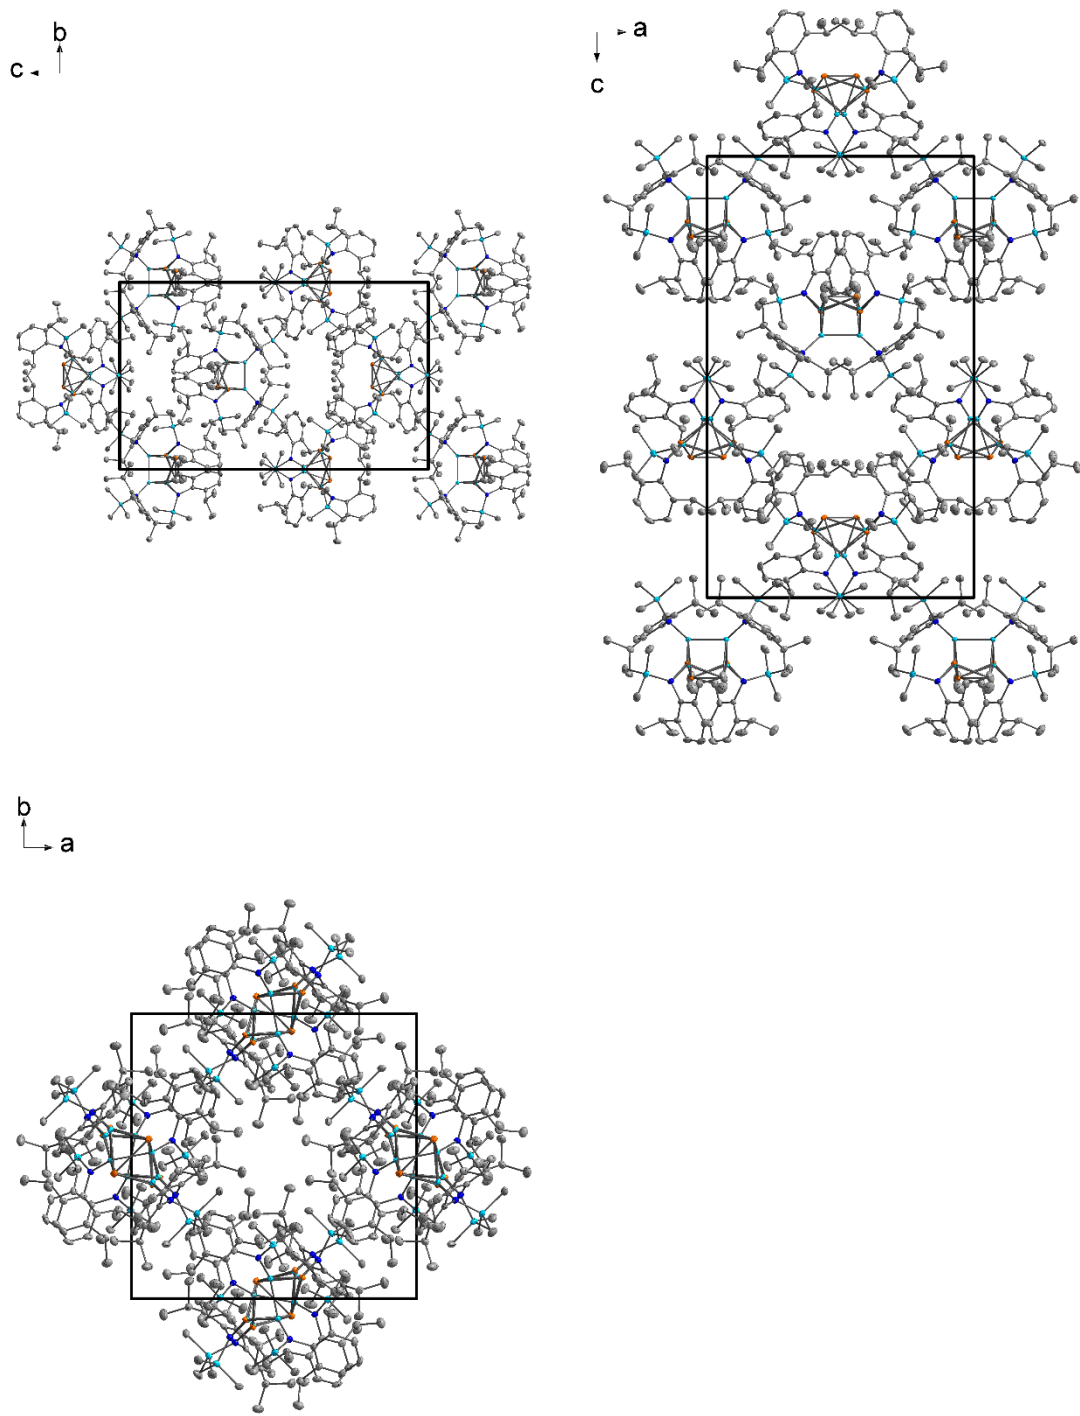

**Figure S17.** Packing of the crystal structures of **1**. Views along a, b and c axis. Hydrogen atoms and disordered hexane molecules are omitted for clarity. Color code: silicon (turquoise), germanium (orange), nitrogen (blue), carbon (gray).

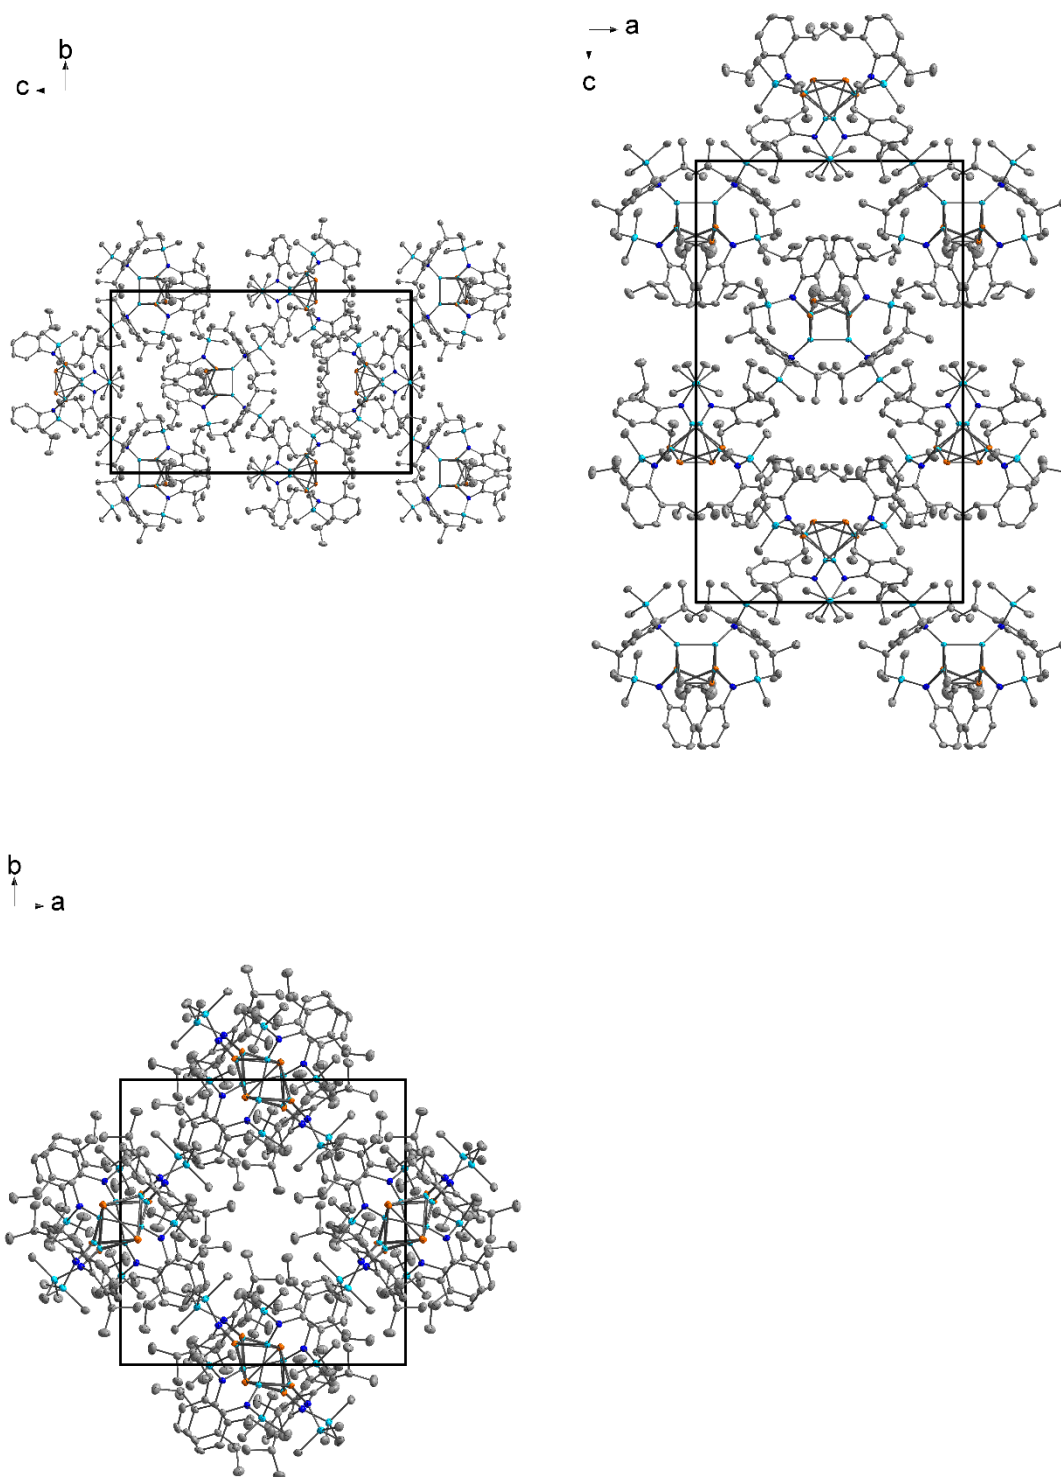

**Figure S18.** Packing of the crystal structures of **2**. Views along *a*, *b* and *c* axis. Hydrogen atoms and disordered hexane molecules are omitted for clarity. Color code: silicon (turquoise), germanium (orange), nitrogen (blue), carbon (gray).

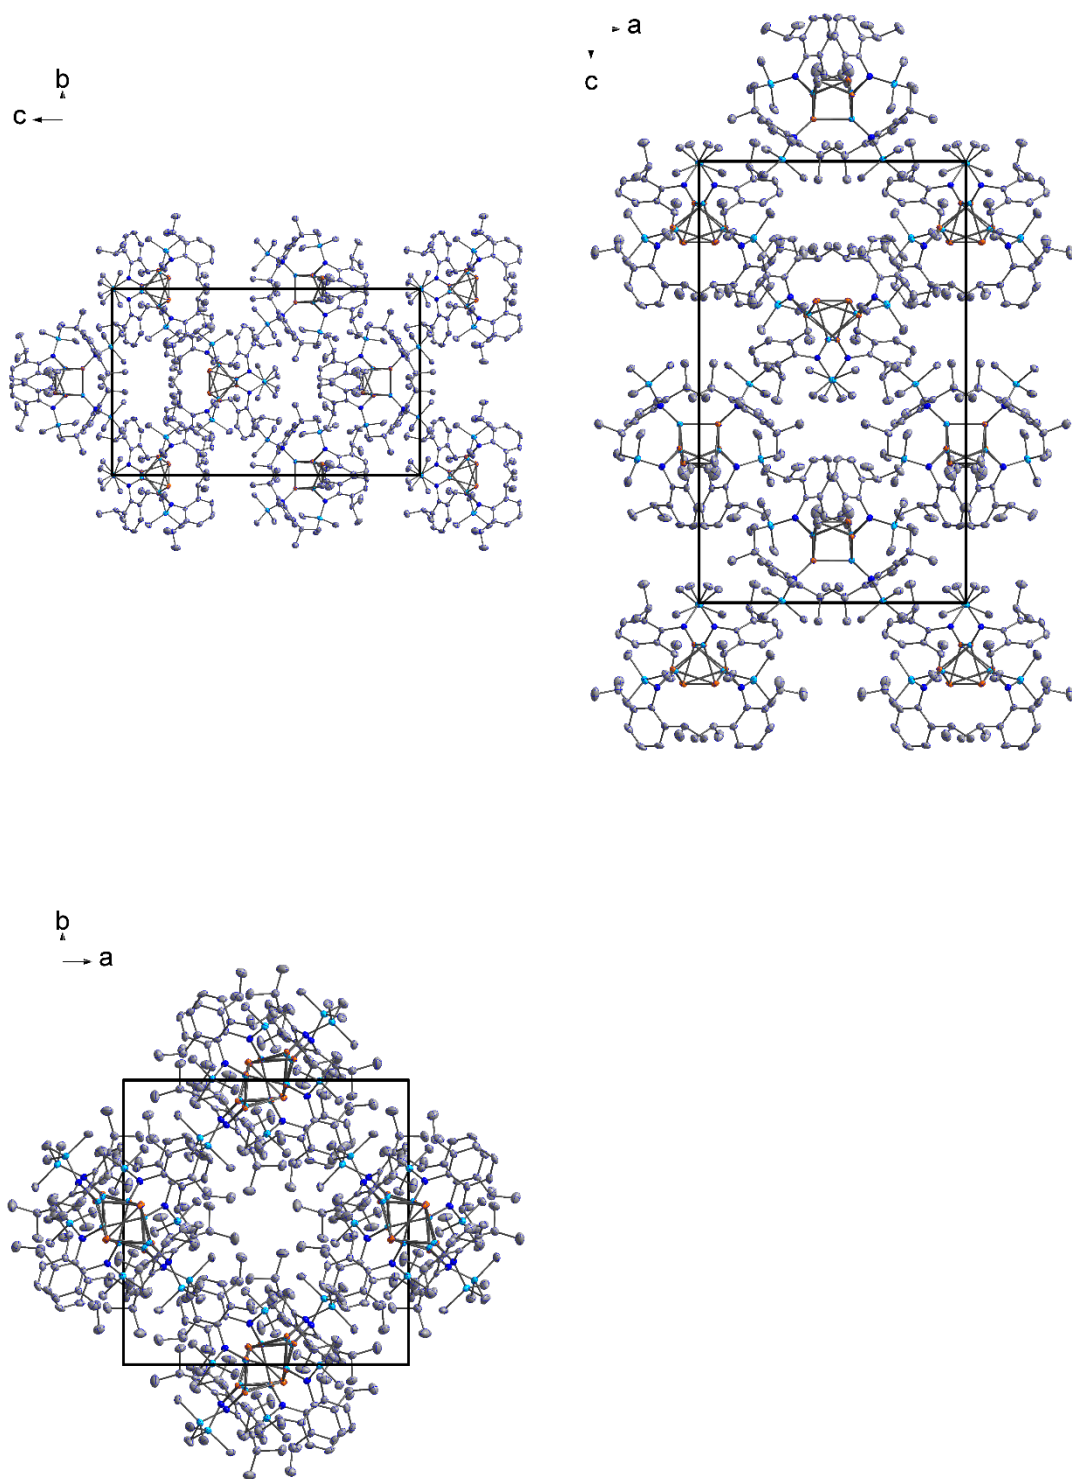

**Figure S19.** Packing of the crystal structures of **3**. Views along *a*, *b* and *c* axis. Hydrogen atoms and disordered hexane molecules are omitted for clarity. Color code: silicon (turquoise), germanium (orange), nitrogen (blue), carbon (gray).

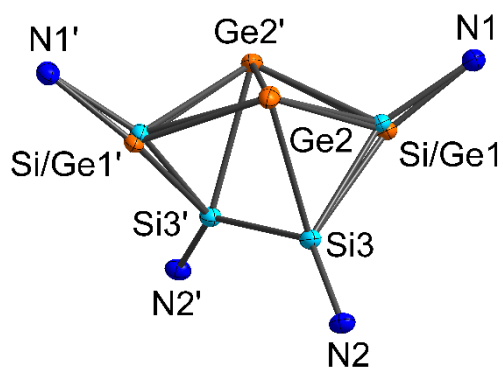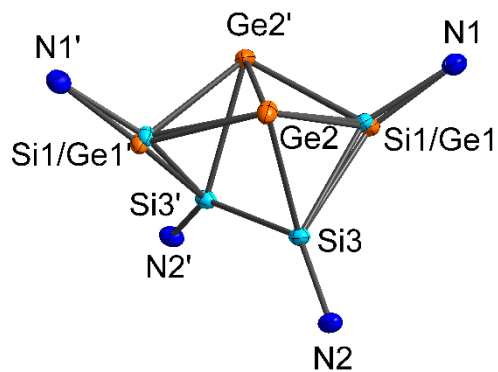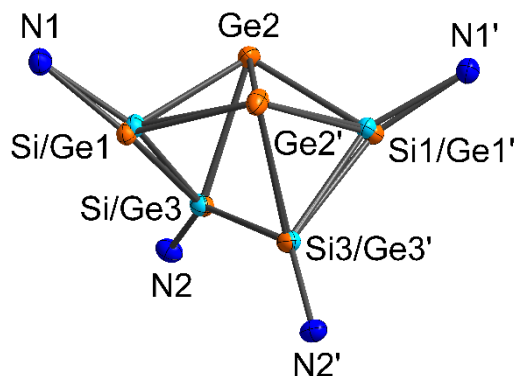

**Figure S20.** Cluster cores of **1-3** showing the mixed silicon germanium sites.



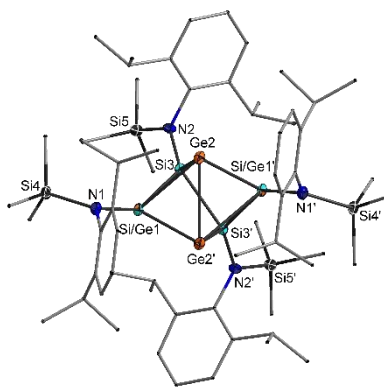

1

**Figure S21.** Molecular structure of **1**.

Selected distances /Å

Ge2–Si1B 2.626(3), Ge2–Ge1A 2.786(9), Ge2–Si1B' 2.352(4), Ge2–Ge1A' 2.453(10),  
 Ge2–Si3 2.4823(5), Ge2–Ge2' 2.7868(4), Ge1A–Si3 2.350(10), Si1B–Si3 2.341(4),  
 Ge1A'–Ge2 2.453(10), Si1B'–Ge2 2.352(4), Si3–Si3' 2.3843(9), Ge1A–N1 1.747(10),  
 Si1B–N1 1.753(4), Si3–N2 1.7402(14), Si5–N2 1.7649(14), Si4–N1 1.7631(16),  
 Si4–C13 1.862(2), Si4–C14 1.862(2), Si4–C15 1.861(2), Si5–C28 1.8654(19),  
 Si5–C29 1.858(2), Si5–C30 1.857(2).

Selected angles /°

Si3–Ge2–Si1B 54.45(8), Si3–Ge2–Ge1A 52.6(2), Si3–Si1B–Ge2 59.64(9),  
 Si3–Ge1A–Ge2 57.0(2), Si1B–Si3–Ge2 65.91(7), Ge1A–Si3–Ge2 70.4(2),  
 Si1B–Ge2'–Si3' 80.38(9), Ge1A–Ge2'–Si3' 78.8(2), Si1B–Ge2–Si1B' 100.78(14),  
 Ge1A–Ge2–Ge1A' 101.8(3), Si1B'–Ge2–Ge2' 60.77(9), Ge1A'–Ge2–Ge2' 63.9(2),  
 Si3'–Ge2–Ge2 80.306(11), Si3'–Si3–Ge2 88.799(13), Si3'–Si1B'–Ge2 93.07(14),  
 Si3'–Ge1A'–Ge2 90.3(3), Ge2–Si1B–Ge2' 67.83(8), Ge2–Ge1A–Ge2' 63.9(2),  
 Si1B–Ge2–Ge2' 51.40(9), Ge1A–Ge2–Ge2' 52.2(2), Si1B–Si3–Si3' 82.68(11),  
 Ge1A–Si3–Si3' 82.9(3), N1–Si1B–Si3 144.3(2), N1–Ge1A–Si3 144.0(6),  
 N1–Si1B–Ge2 116.06(17), N1–Ge1A–Ge2 109.2(4), N1–Ge1A–Ge2' 114.4(5),  
 N1–Si1B–Ge2' 119.1(2), N2–Si3–Si1B 134.53(11), N2–Si3–Ge1A 132.5(3),  
 N2–Si3–Si3' 137.55(5), N2–Si3–Ge2 121.67(5).

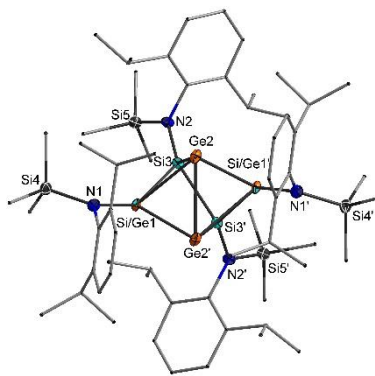

**2**

**Figure S22.** Molecular structure of **2**.

Selected distances /Å

Ge1A–Si3 2.383(4), Si1B–Si3 2.360(8), Ge1A–Ge2' 2.449(3), Si1B–Ge2' 2.338(8),  
 Ge1A–Ge2 2.773(3), Si1B–Ge2 2.622(8), Ge2'–Ge1A 2.449(3), Ge2–Si1B 2.338(8),  
 Ge2'–Si3 2.4832(5), Ge2'–Ge2 2.7798(4), Ge1A–N1 1.781(4), Si1B–N1 1.813(8),  
 Si3–N2 1.7396(16), Si3–Si3' 2.3950(10), Si4–N1 1.7585(18), Si4–C13 1.865(2),  
 Si4–C14 1.864(3), Si4–C15 1.860(2), Si5–N2 1.7653(16), Si5–C28 1.864(2),  
 Si5–C29 1.857(2), Si5–C30 1.858(2).

Selected angles /°

Si3–Ge1A–Ge2' 90.21(11), Si3–Ge1A–Ge2 56.97(8), Ge2–Ge1A–Ge2' 63.97(7),  
 Ge2'–Si1B–Si3 93.5(3), Ge2–Si1B–Ge2' 67.90(19), Si3–Si1B–Ge2 59.51(19),  
 Ge1A'–Ge2–Si3 78.63(8), Si1B'–Ge2–Si3 79.7(2), Ge1A–Ge2–Ge1A' 101.88(12),  
 Si1B–Ge2–Si1B' 100.2(3), Si3–Ge2–Ge1A 53.57(7), Si3–Ge2–Si1B 55.00(17),  
 Ge1A–Ge2–Ge2' 63.70(9), Si1B–Ge2–Ge2' 60.9(2), Si3–Ge2–Ge2' 80.937(13),  
 Ge1A–Ge2–Ge2' 52.33(8), Si1B–Ge2–Ge2' 51.18(18), Ge1A–Si3–Si3' 81.69(9),  
 Si1B–Si3–Si3' 81.0(2), Ge1A–Si3–Ge2 69.45(8), Si1B–Si3–Ge2 65.50(18),  
 Si3–Si3'–Ge2 89.121(15), N1–Ge1A–Si3 144.0(2), N1–Si1B–Si3 143.3(4),  
 N1–Ge1A–Ge2' 115.30(17), N1–Si1B–Ge2' 119.3(4), N1–Ge1A–Ge2 110.19(16),  
 N1–Si1B–Ge2 115.6(4), N2–Si3–Ge1A 132.43(10), N2–Si3–Si1B 134.8(2),  
 N2–Si3–Si3' 137.77(5), N2–Si3–Ge2 122.77(6).

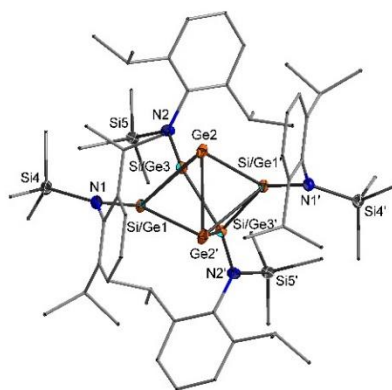

**3**

**Figure S23.** Molecular structure of **3**.

Selected distances /Å

Ge1A–Ge2 2.7641(18), Si1B–Ge2 2.592(19), Si1B–Ge2' 2.34(2), Ge1A–Ge2' 2.441(2),  
 Ge1A–Ge3A 2.428(18), Si1B–Si3B 2.36(2), Ge2–Si3B 2.500(11), Ge2–Ge3A 2.497(18),  
 Ge2'–Si1B' 2.592(19), Ge2'–Ge1A' 2.7641(18), Ge2–Ge2' 2.7715(7), Si3B–Si3B' 2.44(2),  
 Ge3A–Ge3A' 2.42(3), Si3B'–Si1B' 2.36(2), Ge3A'–Ge1A' 2.428(18), Si1B–N1 1.87(2),  
 Ge1A–N1 1.829(4), Si3B–N2 1.762(11), Ge3A–N2 1.759(18), Si4–N1 1.753(3),  
 Si5–N2 1.762(3), Si4–C13 1.862(4), Si4–C14 1.861(4), Si4–C15 1.868(4),  
 Si5–C28 1.857(3), Si5–C29 1.856(3), Si5–C30 1.858(4).

Selected angles /°

Si3B–Si1B–Ge2 60.4(6), Ge3A–Ge1A–Ge2 57.1(4), Ge3A'–Ge1A'–Ge2 90.5(4),  
 Ge2–Si1B'–Si3B' 94.6(8), Ge3A'–Ge3A–Ge1A 79.8(7), Si1B–Si3B–Si3B' 80.5(7),  
 Ge2–Ge1A–Ge2' 63.99(4), Ge2–Si1B–Ge2' 68.2(5), Si1B–Ge2'–Si3B 79.6(6),  
 Ge1A–Ge2'–Ge3A 78.0(4), Si1B–Ge2–Si1B' 99.6(8), Ge1A–Ge2–Ge1A' 101.61(9),  
 Si3B–Ge2–Si1B 55.2(6), Ge3A–Ge2–Ge1A 54.7(4), Si1B'–Ge2–Ge2' 60.2(5),  
 Ge1A'–Ge2–Ge2' 63.68(5), Si1B–Ge2–Ge2' 51.6(5), Ge1A–Ge2–Ge2' 52.34(6),  
 Si3B–Ge2–Ge2' 81.7(3), Ge3A–Ge2–Ge2' 81.9(4), Si1B–Si3B–Ge2 64.4(5),  
 Ge1A–Ge3A–Ge2 68.3(5), Si3B'–Si3B–Ge2 88.7(3), Ge3A'–Ge3A–Ge2 89.4(5),  
 N1–Si1B–Si3B 143.7(13), N1–Ge1A–Ge3A 143.9(4), N1–Si1B–Ge2' 118.8(11),  
 N1–Ge1A–Ge2' 115.72(14), N1–Si1B–Ge2 117.0(10), N1–Ge1A–Ge2 110.94(12),  
 N2–Si3B–Si3B' 137.6(4), N2–Ge3A–Ge3A' 138.7(7), N2–Si3B–Si1B 135.4(8),  
 N2–Ge3A–Ge1A 131.5(9), N2–Si3B–Ge2 123.9(5), N2–Ge3A–Ge2 124.2(9).

## 5. Quantum chemical investigations of isomers of clusters present in 1 and 2

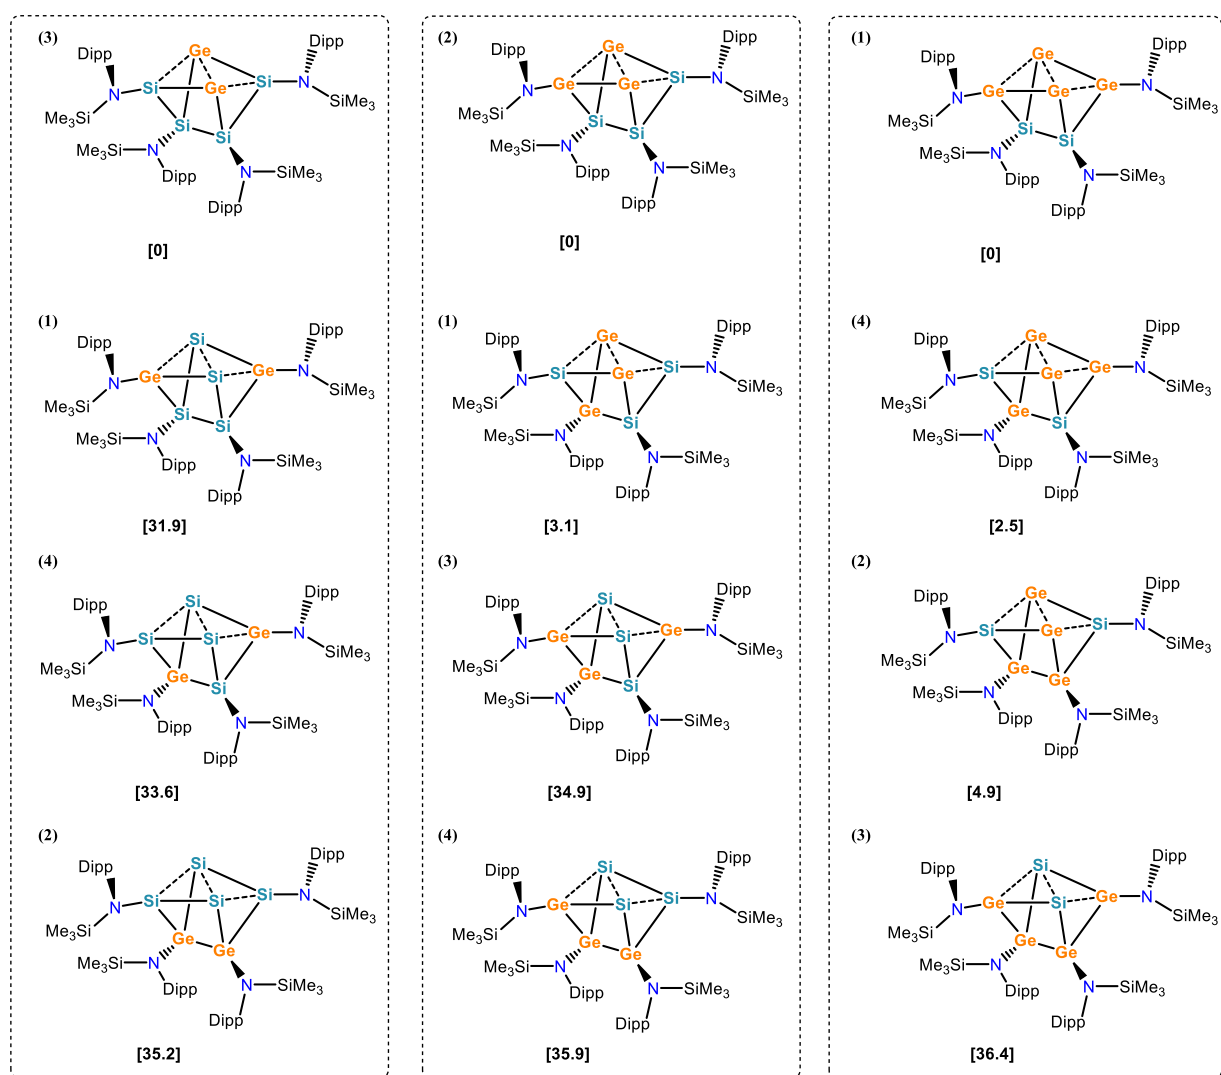

**Table S2.** Energies of isomers of clusters with core compositions  $\text{Si}_4\text{Ge}_2$ ,  $\text{Si}_3\text{Ge}_3$  and  $\text{Si}_2\text{Ge}_4$ .

|                 | E /Hartree              | $\Delta E$ /Hartree | $\Delta E$ /kcal·mol <sup>-1</sup> |
|-----------------|-------------------------|---------------------|------------------------------------|
| <b>Si4Ge2</b>   |                         |                     |                                    |
| Si4Ge2_1        | -9040.341433711         | 0.050845749         | 31.90                              |
| Si4Ge2_2        | -9040.336121606         | 0.056157854         | 35.20                              |
| <b>Si4Ge2_3</b> | <b>-9040.392279460</b>  | 0.000000000         | 0                                  |
| Si4Ge2_4        | -9040.338758010         | 0.053521450         | 33.60                              |
| <b>Si3Ge3</b>   |                         |                     |                                    |
| Si3Ge3_1        | -10827.845643420        | 0.004920220         | 3.10                               |
| <b>Si3Ge3_2</b> | <b>-10827.850563640</b> | 0.000000000         | 0                                  |
| Si3Ge3_3        | -10827.794962940        | 0.055600700         | 34.90                              |
| Si3Ge3_4        | -10827.793303230        | 0.057260410         | 35.90                              |
| <b>Si2Ge4</b>   |                         |                     |                                    |
| <b>Si2Ge4_1</b> | <b>-12615.307725020</b> | 0.000000000         | 0                                  |
| Si2Ge4_2        | -12615.299889170        | 0.007835850         | 4.90                               |
| Si2Ge4_3        | -12615.249655250        | 0.058069770         | 36.40                              |
| Si2Ge4_4        | -12615.303771300        | 0.003953720         | 2.50                               |

## 6. Results from $^{29}\text{Si}\{^1\text{H}\}$ CP/MAS NMR spectroscopy of **1** and **2**

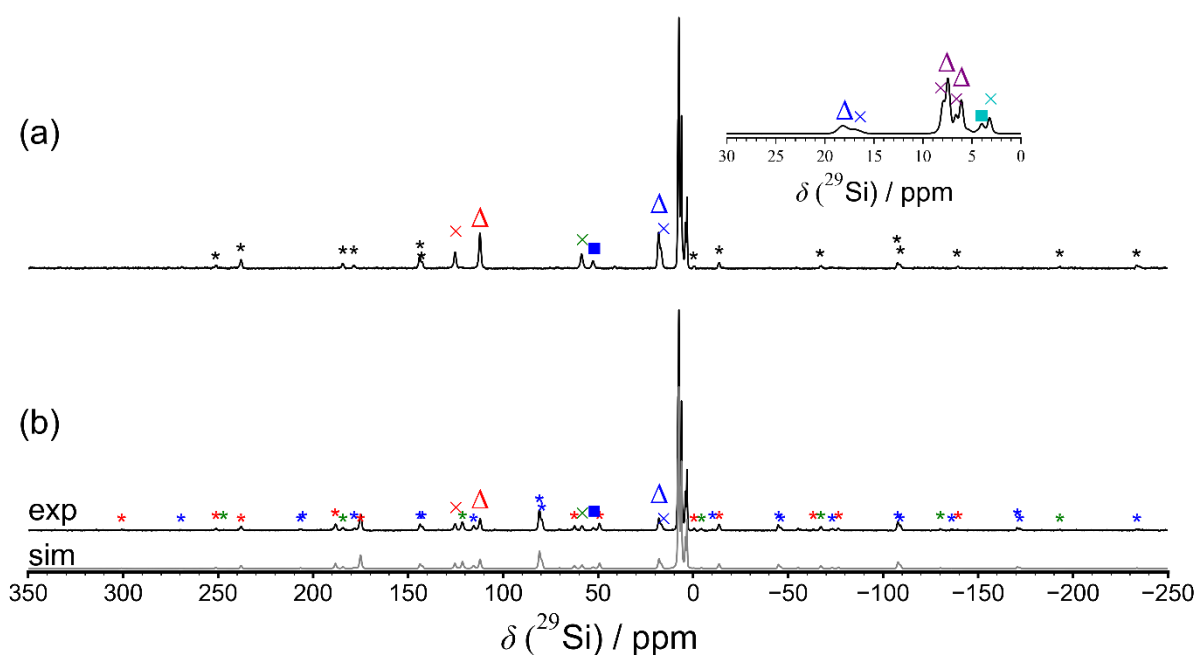

**Figure S24.**  $^{29}\text{Si}\{^1\text{H}\}$  CP/MAS NMR spectra of **2** recorded at 9.4 T employing spinning frequencies of (a) 10.0 and (b) 5.0 kHz, respectively. In (b) the corresponding fit is shown in grey. The spinning side-bands are marked by an asterisk. The inset shows an enlargement of the TMS groups. The different colors mark the Si positions. The cross, triangle, and square represent the signals corresponding to  $\text{Si}_3\text{Ge}_3$ ,  $\text{Si}_4\text{Ge}_2$  and  $\text{Si}_2\text{Ge}_4$ , respectively.

The  $^{29}\text{Si}\{^1\text{H}\}$  CP/MAS NMR spectra of **1** and **2** are shown in Figure S24 and S25. In **1** only  $\text{Si}_3\text{Ge}_3$  and  $\text{Si}_4\text{Ge}_2$  are present whereas **2** also contains some amount of  $\text{Si}_2\text{Ge}_4$ . By comparison of the relative intensities the signals at 125, 58, and 3.2 ppm can be assigned to  $\text{Si}_3\text{Ge}_3$  and the signals at 112 and 18 ppm correspond to  $\text{Si}_4\text{Ge}_2$ . The signals at 52 and 4.0 ppm can be assigned to  $\text{Si}_2\text{Ge}_4$  since they are only present in **2**. The signals at 7.4, 6.1, 7.9, and 6.6 ppm can be assigned to the  $\text{SiMe}_3$  groups of  $\text{Si}_4\text{Ge}_2$  and  $\text{Si}_3\text{Ge}_3$ , respectively. However, the  $\text{SiMe}_3$  signals of  $\text{Si}_2\text{Ge}_4$  cannot be distinguished since they overlap with the other  $\text{SiMe}_3$  signals.

**Table S3.** Relative intensities of the  $^{29}\text{Si}$  signals. The intensities were normalized to the signal at  $\delta^{29}\text{Si} = 125$  and 112 ppm, respectively to reveal the signals belonging to the same compound.

| $\delta(^{29}\text{Si}) / \text{ppm}$ | <b>2</b> (with $\text{Si}_4\text{Ge}_2$ , $\text{Si}_3\text{Ge}_3$ and $\text{Si}_2\text{Ge}_4$ ) |                       | <b>1</b> (with $\text{Si}_4\text{Ge}_2$ and $\text{Si}_3\text{Ge}_3$ ) |                       |
|---------------------------------------|---------------------------------------------------------------------------------------------------|-----------------------|------------------------------------------------------------------------|-----------------------|
|                                       | normalized to 125 ppm                                                                             | normalized to 112 ppm | normalized to 125 ppm                                                  | normalized to 112 ppm |
| 125                                   | 1.00                                                                                              | 0.53                  | 1.00                                                                   | 0.16                  |
| 112                                   | 1.87                                                                                              | 1.00                  | 6.23                                                                   | 1.00                  |
| 59                                    | 0.84                                                                                              | 0.45                  | 0.83                                                                   | 0.13                  |
| 52                                    | 0.40                                                                                              | 0.21                  |                                                                        |                       |
| 18                                    | 1.46                                                                                              | 0.78                  | 4.46                                                                   | 0.72                  |
| 17                                    | 0.86                                                                                              | 0.46                  | 1.85                                                                   | 0.30                  |
| 4.0                                   | 1.36                                                                                              | 0.73                  |                                                                        |                       |
| 3.2                                   | 1.04                                                                                              | 0.56                  | 1.12                                                                   | 0.18                  |

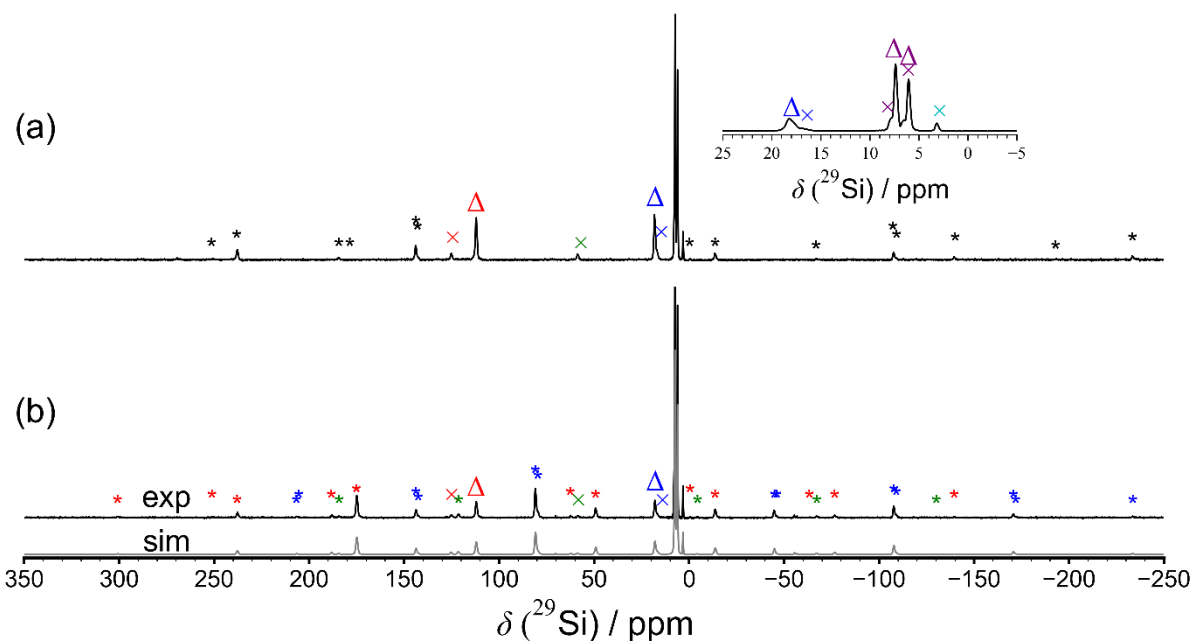

**Figure S25.**  $^{29}\text{Si}\{^1\text{H}\}$  CP/MAS NMR spectra of **1** recorded at 9.4 T employing spinning frequencies of (a) 10.0 and (b) 5.0 kHz, respectively. In (b) the corresponding fit is shown in grey. The spinning side-bands are marked by an asterisk. The inset shows an enlargement of the  $\text{SiMe}_3$  groups. The different colors mark the Si positions. The cross and triangle represent the signals corresponding to  $\text{Si}_3\text{Ge}_3$ ,  $\text{Si}_4\text{Ge}_2$ , respectively.  $\text{Si}_2\text{Ge}_4$  is not present in this sample.

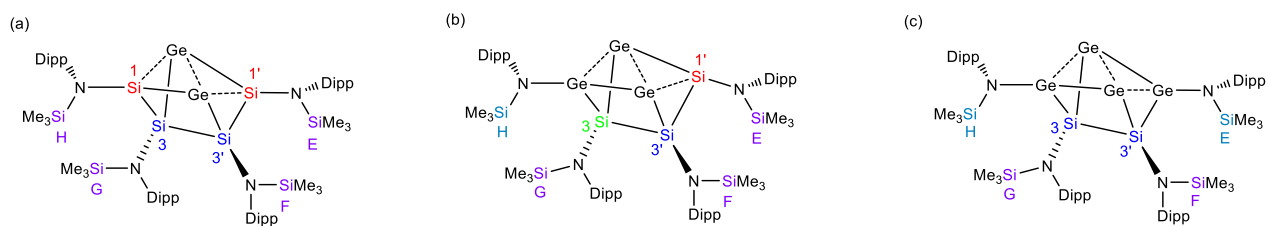

**Figure S26.** Chemical structure of (a)  $\text{Si}_4\text{Ge}_2$ , (b)  $\text{Si}_3\text{Ge}_3$ , and (c)  $\text{Si}_2\text{Ge}_4$  with the corresponding labels of the Si atoms. The color code is identical to the assignment used in Figure S22 and S23.

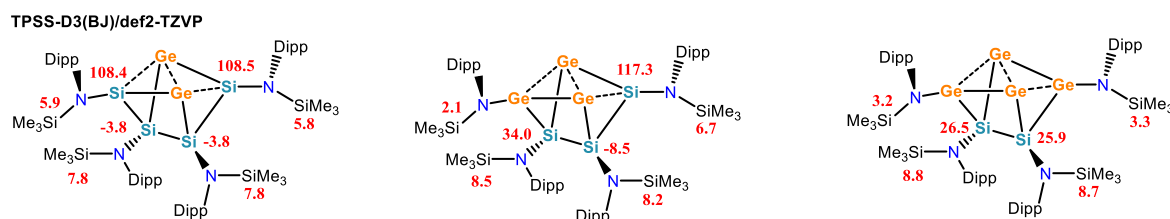

**Table S4.** Calculated (TPSS-D3(BJ)/def2-TZVP) isotropic chemical shift and anisotropic chemical shift parameters ( $\text{R} = \text{N}(\text{SiMe}_3)\text{Dipp}$ ).

| Site | $\text{Si}_4\text{Ge}_2\text{R}_4$    |                              |               | $\text{Si}_3\text{Ge}_3\text{R}_4$    |                              |               | $\text{Si}_2\text{Ge}_4\text{R}_4$    |                              |               |
|------|---------------------------------------|------------------------------|---------------|---------------------------------------|------------------------------|---------------|---------------------------------------|------------------------------|---------------|
|      | $\delta(^{29}\text{Si}) / \text{ppm}$ | $\delta_\sigma / \text{ppm}$ | $\eta_\sigma$ | $\delta(^{29}\text{Si}) / \text{ppm}$ | $\delta_\sigma / \text{ppm}$ | $\eta_\sigma$ | $\delta(^{29}\text{Si}) / \text{ppm}$ | $\delta_\sigma / \text{ppm}$ | $\eta_\sigma$ |
| Si1' | 108.5                                 | -176.4                       | 0.4           | 117.3                                 | -162.2                       | 0.7           | -                                     | -                            | -             |
| Si3' | -3.7                                  | -201.1                       | 0.1           | -8.5                                  | -211.5                       | 0.2           | 25.9                                  | -206.0                       | 0.2           |
| Si3  | -3.8                                  | -201.1                       | 0.1           | 34.0                                  | -196.0                       | 0.2           | 26.5                                  | -206.3                       | 0.2           |
| Si1  | 108.4                                 | -176.4                       | 0.4           | -                                     | -                            | -             | -                                     | -                            | -             |
| SiE  | 7.8                                   | -19.1                        | 0.4           | 8.5                                   | -18.0                        | 0.4           | 8.7                                   | -18.1                        | 0.3           |
| SiF  | 7.8                                   | -19.1                        | 0.4           | 8.2                                   | -19.4                        | 0.3           | 8.8                                   | -18.2                        | 0.3           |
| SiG  | 5.9                                   | -14.0                        | 0.5           | 6.7                                   | -13.5                        | 0.5           | 3.2                                   | -17.9                        | 0.5           |
| SiH  | 5.9                                   | -14.1                        | 0.5           | 2.1                                   | -18.4                        | 0.5           | 3.3                                   | -17.9                        | 0.5           |

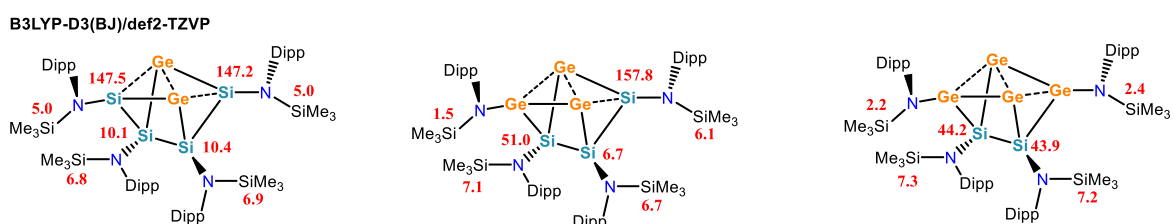

**Table S5.** Calculated (B3LYP-D3(BJ)/def2-TZVP) isotropic chemical shift and anisotropic chemical shift parameters ( $\text{R} = \text{N}(\text{SiMe}_3)\text{Dipp}$ ).

| Site | $\text{Si}_4\text{Ge}_2\text{R}_4$    |  |  | $\text{Si}_3\text{Ge}_3\text{R}_4$    |  |  | $\text{Si}_2\text{Ge}_4\text{R}_4$    |  |  |
|------|---------------------------------------|--|--|---------------------------------------|--|--|---------------------------------------|--|--|
|      | $\delta(^{29}\text{Si}) / \text{ppm}$ |  |  | $\delta(^{29}\text{Si}) / \text{ppm}$ |  |  | $\delta(^{29}\text{Si}) / \text{ppm}$ |  |  |
| Si1' | 147.2                                 |  |  | 157.8                                 |  |  | -                                     |  |  |
| Si3' | 10.4                                  |  |  | 6.7                                   |  |  | 43.9                                  |  |  |
| Si3  | 10.1                                  |  |  | 51.0                                  |  |  | 44.2                                  |  |  |
| Si1  | 147.5                                 |  |  | -                                     |  |  | -                                     |  |  |
| SiE  | 5.0                                   |  |  | 6.1                                   |  |  | 2.4                                   |  |  |
| SiF  | 6.9                                   |  |  | 6.7                                   |  |  | 7.2                                   |  |  |
| SiG  | 6.8                                   |  |  | 7.1                                   |  |  | 7.3                                   |  |  |
| SiH  | 5.0                                   |  |  | 1.5                                   |  |  | 2.2                                   |  |  |

**Table S6.** Experimental determined  $^{29}\text{Si}$  isotropic chemical shifts ( $\delta$ ), chemical shift anisotropy parameters ( $\delta_\sigma$ ,  $\eta_\sigma$ ) for the mixed  $\text{Si}_4\text{Ge}_2$ ,  $\text{Si}_3\text{Ge}_3$  and  $\text{Si}_4\text{Ge}_2$  clusters.

| Site                         | <b>2</b> (with $\text{Si}_4\text{Ge}_2$ , $\text{Si}_3\text{:Ge}_3$ and $\text{Si}_2\text{Ge}_4$ ) |                              |                | Cluster                  | <b>1</b> (with $\text{Si}_4\text{Ge}_2$ and $\text{Si}_3\text{:Ge}_3$ ) |                              |                |
|------------------------------|----------------------------------------------------------------------------------------------------|------------------------------|----------------|--------------------------|-------------------------------------------------------------------------|------------------------------|----------------|
|                              | $\delta(^{29}\text{Si}) / \text{ppm}$                                                              | $\delta_\sigma / \text{ppm}$ | $\eta_\sigma$  |                          | $\delta(^{29}\text{Si}) / \text{ppm}$                                   | $\delta_\sigma / \text{ppm}$ | $\eta_\sigma$  |
| <b>Si1'</b>                  | $125.4 \pm 0.2$                                                                                    | $-176 \pm 20$                | $0.6 \pm 0.05$ | $\text{Si}_3\text{Ge}_3$ | $125.1 \pm 0.2$                                                         | $-176 \pm 20$                | $0.5 \pm 0.05$ |
| <b>Si1'/Si1</b>              | $112.1 \pm 0.2$                                                                                    | $-201 \pm 20$                | $0.4 \pm 0.05$ | $\text{Si}_4\text{Ge}_2$ | $112.0 \pm 0.2$                                                         | $-195 \pm 20$                | $0.4 \pm 0.05$ |
| <b>Si3'/Si3</b>              | $58.5 \pm 0.2$                                                                                     | $-226 \pm 20$                | $0 \pm 0.05$   | $\text{Si}_3\text{Ge}_3$ | $58.5 \pm 0.2$                                                          | $-233 \pm 20$                | $0 \pm 0.05$   |
| <b>Si3</b>                   | $52.6 \pm 0.2$                                                                                     | $-233 \pm 20$                | $0 \pm 0.05$   | $\text{Si}_2\text{Ge}_4$ |                                                                         |                              |                |
| <b>Si3'</b>                  | $18.0 \pm 0.2$                                                                                     | $-220 \pm 20$                | $0 \pm 0.05$   | $\text{Si}_4\text{Ge}_2$ | $18.0 \pm 0.2$                                                          | $-214 \pm 20$                | $0 \pm 0.05$   |
| <b>Si3'</b>                  | $16.7 \pm 0.2$                                                                                     | $-226 \pm 20$                | $0 \pm 0.05$   | $\text{Si}_3\text{Ge}_3$ | $16.9 \pm 0.2$                                                          | $-208 \pm 20$                | $0 \pm 0.05$   |
| <b>SiMe<sub>3</sub> (Si)</b> | $8.0 \pm 0.2$                                                                                      | $19 \pm 20$                  | $0 \pm 0.05$   |                          | $7.9 \pm 0.2$                                                           | $31 \pm 20$                  | $0 \pm 0.05$   |
|                              | $7.5 \pm 0.2$                                                                                      | $19 \pm 20$                  | $0 \pm 0.05$   |                          | $7.4 \pm 0.2$                                                           | $19 \pm 20$                  | $0 \pm 0.05$   |
|                              | $6.6 \pm 0.2$                                                                                      | $19 \pm 20$                  | $0.8 \pm 0.05$ |                          | $6.6 \pm 0.2$                                                           | $31 \pm 20$                  | $0 \pm 0.05$   |
|                              | $6.1 \pm 0.2$                                                                                      | $13 \pm 20$                  | $0.7 \pm 0.05$ |                          | $6.1 \pm 0.2$                                                           | $13 \pm 20$                  | $0.6 \pm 0.05$ |
| <b>SiMe<sub>3</sub> (Ge)</b> | $4.0 \pm 0.2$                                                                                      | $13 \pm 20$                  | $0.6 \pm 0.05$ | $\text{Si}_2\text{Ge}_4$ |                                                                         |                              |                |
|                              | $3.2 \pm 0.2$                                                                                      | $19 \pm 20$                  | $1 \pm 0.05$   | $\text{Si}_3\text{Ge}_3$ | $3.2 \pm 0.2$                                                           | $19 \pm 20$                  | $0 \pm 0.05$   |

**Footnote:** The CSA parameters are defined as  $\delta_{\text{iso}} = 1/3(\delta_{\text{xx}} + \delta_{\text{yy}} + \delta_{\text{zz}})$ ,  $\delta_\sigma = \delta_{\text{iso}} - \delta_{\text{zz}}$ ,  $\eta_\sigma = (\delta_{\text{xx}} + \delta_{\text{yy}})/\delta_\sigma$ , with  $|\delta_{\text{zz}} - \delta_{\text{iso}}| \geq |\delta_{\text{xx}} - \delta_{\text{iso}}| \geq |\delta_{\text{yy}} - \delta_{\text{iso}}|$ . The asymmetry parameter  $\eta_\sigma$  describes the symmetry of the CSA tensor. The CSA tensor is axial symmetric if  $\eta_\sigma = 0$  and deviates from axial symmetry for  $0 < \eta_\sigma < 1$ .

For the  $\text{SiMe}_3$  groups, the calculated and experimental anisotropic chemical shift parameters deviate from each other since only a “frozen” structure is calculated and the dynamic of the  $\text{SiMe}_3$  groups is not included in these calculations. However, depending whether the amido ligand is bonded to Si or Ge in the **1** or **1'** positions in the clusters, different isotropic chemical shifts were obtained. Those signals at 3.2 and 4.0 ppm with a low chemical shift anisotropy can be assigned to the  $\text{SiMe}_3$  groups in  $\text{Si}_3\text{Ge}_3$  and  $\text{Si}_2\text{Ge}_4$  that are connected to Ge via nitrogen.



## 7. Results from NMR spectroscopy of **1** and **2** in solution

### 7.1 General experimental procedures

All NMR data were obtained on Bruker Avance I and III spectrometer and were referenced to the deuterated solvent ( $C_6D_6$ , THF- $d_8$ , PhMe- $d_8$ ) according to an IUPAC recommendation. Additionally, the  $^1H$  and  $^{13}C$  NMR spectra were referenced internally to residual solvent resonances at 300 K.  $^1H$ ,  $^{13}C$  and  $^{29}Si$  NMR spectra were referenced to tetramethylsilane (TMS;  $\delta = 0$  ppm). Further explanation of the  $^{29}Si$  NMR experiments:  $^{29}Si$  DEPT 19.5 =  $^{29}Si$  NMR measurement with Distortionless Enhancement Polarization Transfer method, pulse angle  $19.5^\circ$ , coupling to 9 protons as polarization source with coupling  $^2J_{Si-H} = 7$  Hz;  $^{29}Si\{^1H\}IG$  = Inverse gated decoupled  $^{29}Si$  proton decoupled NMR measurement;  $^{29}Si\{/}$  =  $^{29}Si$  proton coupled NMR measurement.  $^{13}C$  DEPT 135 = Distortionless Enhancement of Polarization Transfer using a 135 degree decoupler pulse. All  $^{13}C$  NMR spectra were recorded proton decoupled.

### 7.2 Assignment of signals to clusters with core composition **Si<sub>4</sub>:Ge<sub>2</sub>**, **Si<sub>3</sub>:Ge<sub>3</sub>** and **Si<sub>2</sub>:Ge<sub>4</sub>**

The following signals were assigned based on NMR spectroscopy of both **1** and **2** in toluene- $d_8$ . Variable temperature, two-dimensional correlated NMR spectroscopy and comparison of the  $^{29}Si$  NMR spectra was performed to identify each mixed silicon germanium cluster and the occurrence of minor conformers for clusters with the core composition **Si<sub>2</sub>:Ge<sub>4</sub>** and **Si<sub>4</sub>:Ge<sub>2</sub>**.

[Si<sub>4</sub>Ge<sub>2</sub>{N(SiMe<sub>3</sub>)Dipp}<sub>4</sub>]

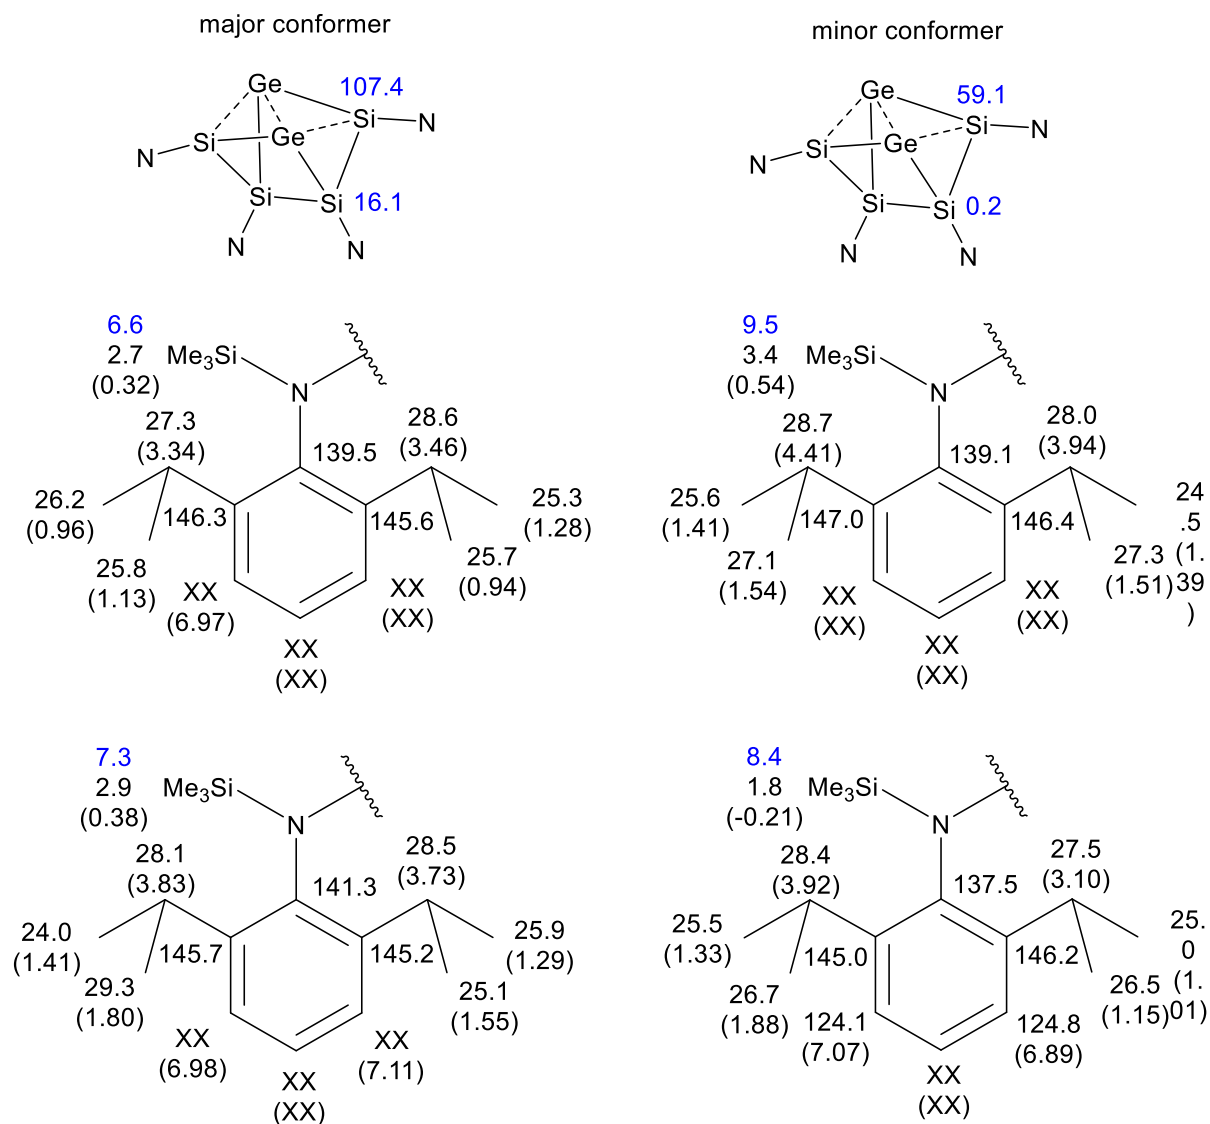

**Figure S27.** Result from multinuclear NMR spectroscopy of **1** and **2** in toluene-d<sub>8</sub> at 220 K. Assignment of signals to the cluster Si<sub>4</sub>Ge<sub>2</sub>{N(SiMe<sub>3</sub>)Dipp}<sub>4</sub>. <sup>1</sup>H (in brackets), <sup>13</sup>C (black), <sup>29</sup>Si (blue).

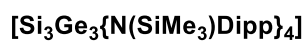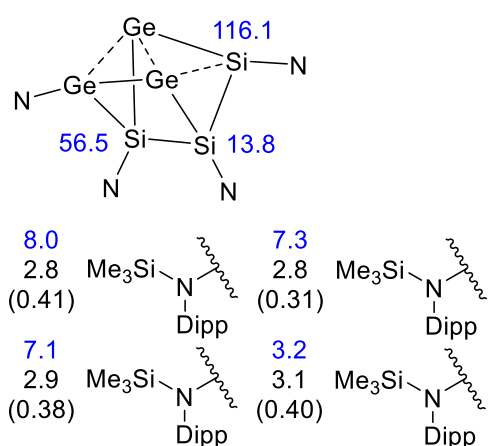

**Figure S28.** Result from multinuclear NMR spectroscopy of **1** and **2** in toluene-d<sub>8</sub> at 220 K. Assignment of signals to the cluster Si<sub>3</sub>Ge<sub>3</sub>{N(SiMe<sub>3</sub>)Dipp}<sub>4</sub>. <sup>1</sup>H (in brackets), <sup>13</sup>C (black), <sup>29</sup>Si (blue).

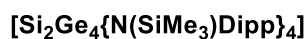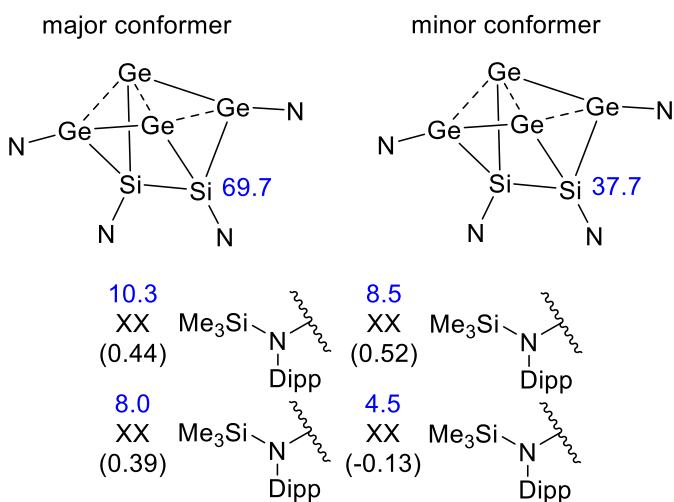

**Figure S29.** Result from multinuclear NMR spectroscopy of **1** and **2** in toluene-d<sub>8</sub> at 220 K. Assignment of signals to the cluster Si<sub>2</sub>Ge<sub>4</sub>{N(SiMe<sub>3</sub>)Dipp}<sub>4</sub>. <sup>1</sup>H (in brackets), <sup>13</sup>C (black), <sup>29</sup>Si (blue).

### Signals assigned to $\text{Si}_4\text{Ge}_2\{\text{N}(\text{SiMe}_3)\text{Dipp}\}_4$

**$^1\text{H}$ -NMR:** (400 MHz, toluene- $d_8$ , 220 K):  $\delta$  (ppm) = 7.15-6.87 (12H, m,  $\ddot{u}.l.$ ); 4.41 (1H, br); 3.94 (1H, br), 3.92 (1H, br); 3.83 (1H, br), 3.73 (1H, br); 3.46 (1H, br); 3.34 (1H, br); 3.10 (1H, br); 1.88 (3H, br); 1.80 (3H, br); 1.54 (6H, br); 1.51 (3H, br); 1.43-1.38 (9H, m); 1.33-1.27 (9H, m); 1.16-1.12 (6H, m); 1.01 (3H, br); 0.98-0.93 (6H, m); 0.54 (9H, s); 0.38 (9H, s); 0.32 (9H, s); -0.21 (9H, s).

**$^{13}\text{C}$ -NMR:** (101 MHz, toluene- $d_8$ , 220 K):  $\delta$  (ppm) = 147.0; 146.4; 146.3; 146.2; 145.7; 145.5; 145.2; 145.0; 141.3; 139.5; 139.1; 137.5; 125.7; 124.1; 29.3; 28.7; 28.6; 28.5; 28.4; 28.1; 28.0; 27.5; 27.3; 27.3; 27.1; 26.7; 26.5; 26.2; 25.9; 25.8; 25.7; 25.6; 25.5; 25.3; 25.1; 25.0; 24.5; 24.0; 3.4; 2.9; 2.7; 1.8.

**$^{29}\text{Si}\{^1\text{H}\}$ DEPT19.5-NMR:** (79 MHz, toluene- $d_8$ , 220 K):  $\delta$  (ppm) = 9.5; 8.4; 7.3; 6.6.

**$^{29}\text{Si}\{^1\text{H}\}$ IG-NMR:** (79 MHz, toluene- $d_8$ , 220 K, nur Signale von  $[\text{Si}_4\text{Ge}_2\{\text{N}(\text{SiMe}_3)\text{Dipp}\}_4]$ ):  $\delta$  (ppm) = 107.4; 59.1; 16.1; 9.5; 8.4; 7.3; 6.6; 0.2.

### Signals assigned to $\text{Si}_3\text{Ge}_3\{\text{N}(\text{SiMe}_3)\text{Dipp}\}_4$

**$^1\text{H}$ -NMR:** (400 MHz, toluene- $d_8$ ):  $\delta$  (ppm) = 7.16-7.93 (12H,  $\ddot{u}.l.$ ); 3.91 (1H,  $\ddot{u}.l.$ ); 3.78 (2H,  $\ddot{u}.l.$ ); 3.68 (2H,  $\ddot{u}.l.$ ); 3.52 (1H,  $\ddot{u}.l.$ ); 3.35 (1H,  $\ddot{u}.l.$ ); 3.25 (1H,  $\ddot{u}.l.$ ); 1.81 (3H,  $\ddot{u}.l.$ ); 1.75 (3H,  $\ddot{u}.l.$ ); 1.70 (3H,  $\ddot{u}.l.$ ); 1.57 (3H,  $\ddot{u}.l.$ ); 1.52 (6H,  $\ddot{u}.l.$ ); 1.42-1.15 (15H, m,  $\ddot{u}.l.$ ); 1.02 (6H,  $\ddot{u}.l.$ ); 0.97 (3H,  $\ddot{u}.l.$ ); 0.94 (3H,  $\ddot{u}.l.$ ); 0.78 (3H, d,  $^3J_{\text{H-H}} = 6.5$  Hz); 0.41 (9H, s); 0.40 (9H, s); 0.38 (9H, s); 0.31 (9H, s).

**$^{13}\text{C}$ -NMR:** (101 MHz, toluene- $d_8$ , 220 K):  $\delta$  (ppm) = 3.1; 2.9; 2.9; 2.9.

**$^{29}\text{Si}\{^1\text{H}\}$ DEPT19.5-NMR:** (79 MHz, toluene- $d_8$ , 220 K):  $\delta$  (ppm) = 8.0; 7.3; 7.1; 3.2.

**$^{29}\text{Si}\{^1\text{H}\}$ IG-NMR:** (79 MHz, toluene- $d_8$ , 220 K, nur Signale von  $[\text{Si}_3\text{Ge}_3\{\text{N}(\text{SiMe}_3)\text{Dipp}\}_4]$ ):  $\delta$  (ppm) = 116.1; 56.5; 13.8; 8.0; 7.3; 7.1; 3.2.

## Signals assigned to $\text{Si}_2\text{Ge}_4\{\text{N}(\text{SiMe}_3)\text{Dipp}\}_4$

$^1\text{H-NMR}$ : (400 MHz, toluene- $d_8$ ):  $\delta$  (ppm) = 7.16-7.93 (12H,  $\ddot{u}.l.$ ); 4.27 (1H, br); 4.14 (1H, br); 3.96-3.22 (5H,  $\ddot{u}.l.$ ); 2.97 (1H, br); 1.89-0.76 (48H,  $\ddot{u}.l.$ ); 0.52 (9H, s); 0.44 (9H, s); 0.39 (9H, s); -0.31 (9H, s).

$^{29}\text{Si}\{^1\text{H}\}\text{DEPT}19.5\text{-NMR}$ : (79 MHz, toluene- $d_8$ , 220 K):  $\delta$  (ppm) = 10.3; 8.5; 8.0; 4.5.

$^{29}\text{Si}\{^1\text{H}\}\text{IG-NMR}$ : (79 MHz, toluene- $d_8$ , 220 K):  $\delta$  (ppm) = 69.7; 37.7; 10.3; 8.5; 8.0; 4.5.

## 7.3 Solution NMR spectra of **1**

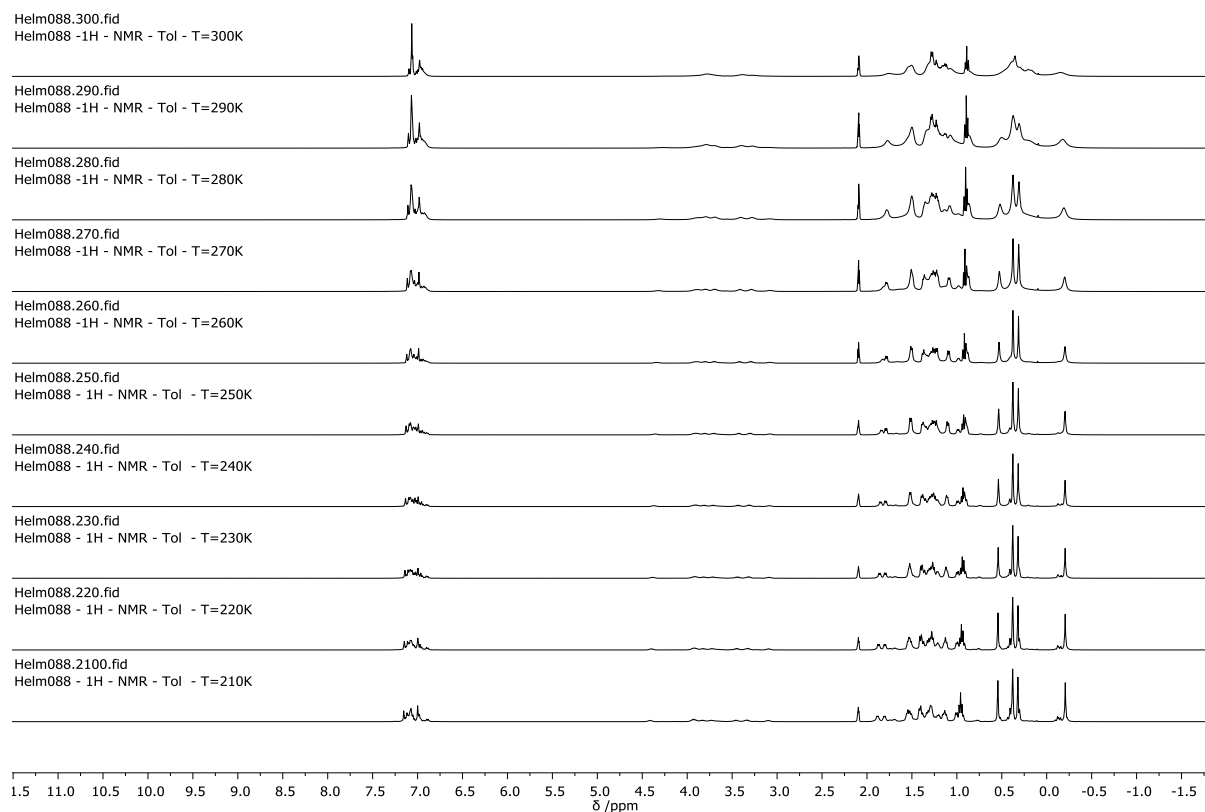

**Figure S30.** Variable temperature  $^1\text{H-NMR}$  spectra ( $d_8$ -toluene, 300-210 K, 400 MHz) of **1**.

Helm088.2102.fid  
Helm088 -  $^{13}\text{C}\{^1\text{H}\}$ DEPT135 - NMR - Tol - T=210K

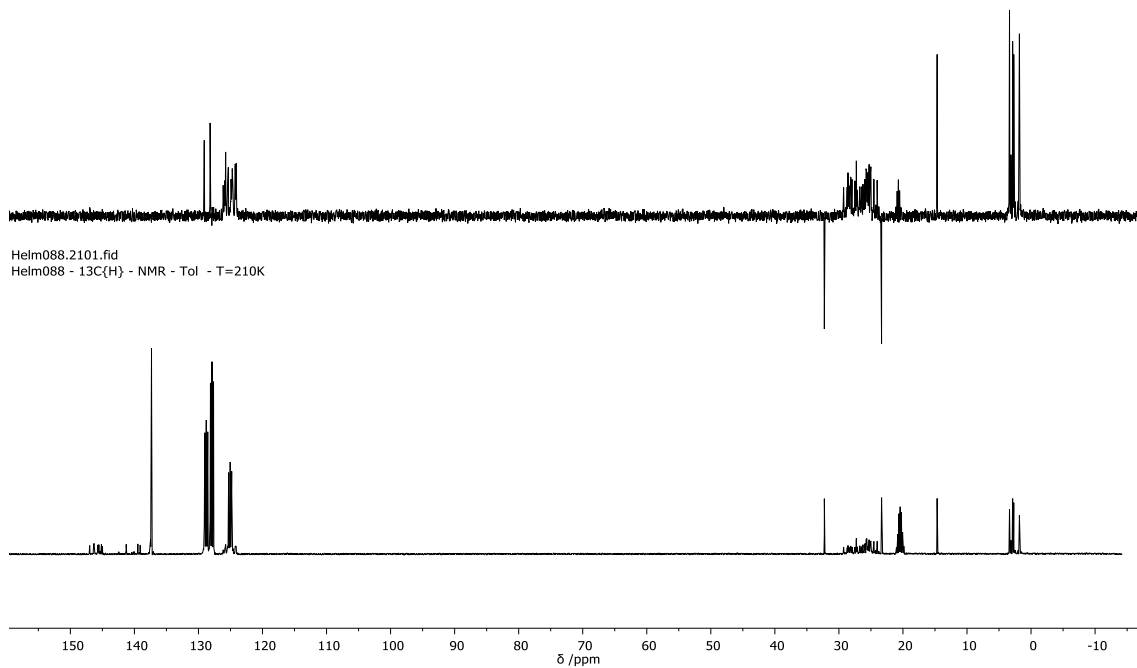

**Figure S31.**  $^{13}\text{C}\{^1\text{H}\}$ -NMR and  $^{13}\text{C}\{^1\text{H}\}$ DEPT135-NMR spectra ( $d_8$ -toluene, 210 K, 100 MHz) of **1**.

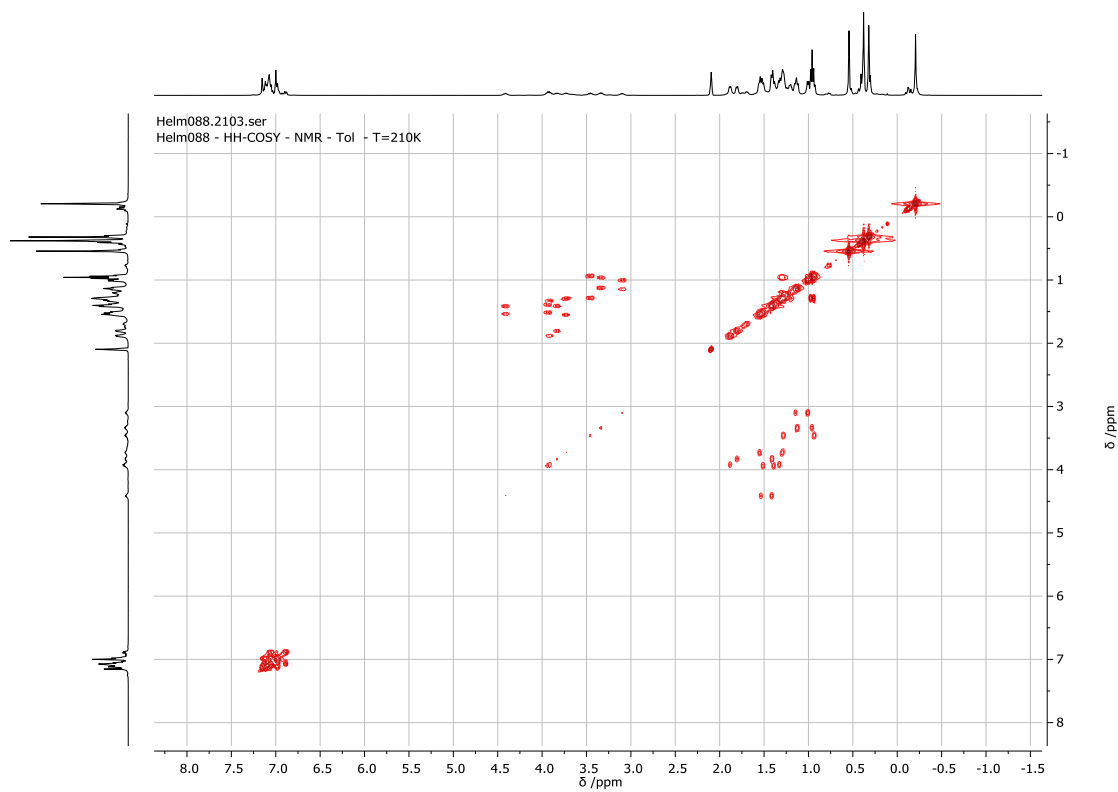

**Figure S32.** H,H-COSY-NMR spectrum ( $d_8$ -toluene, 210 K) of **1**.

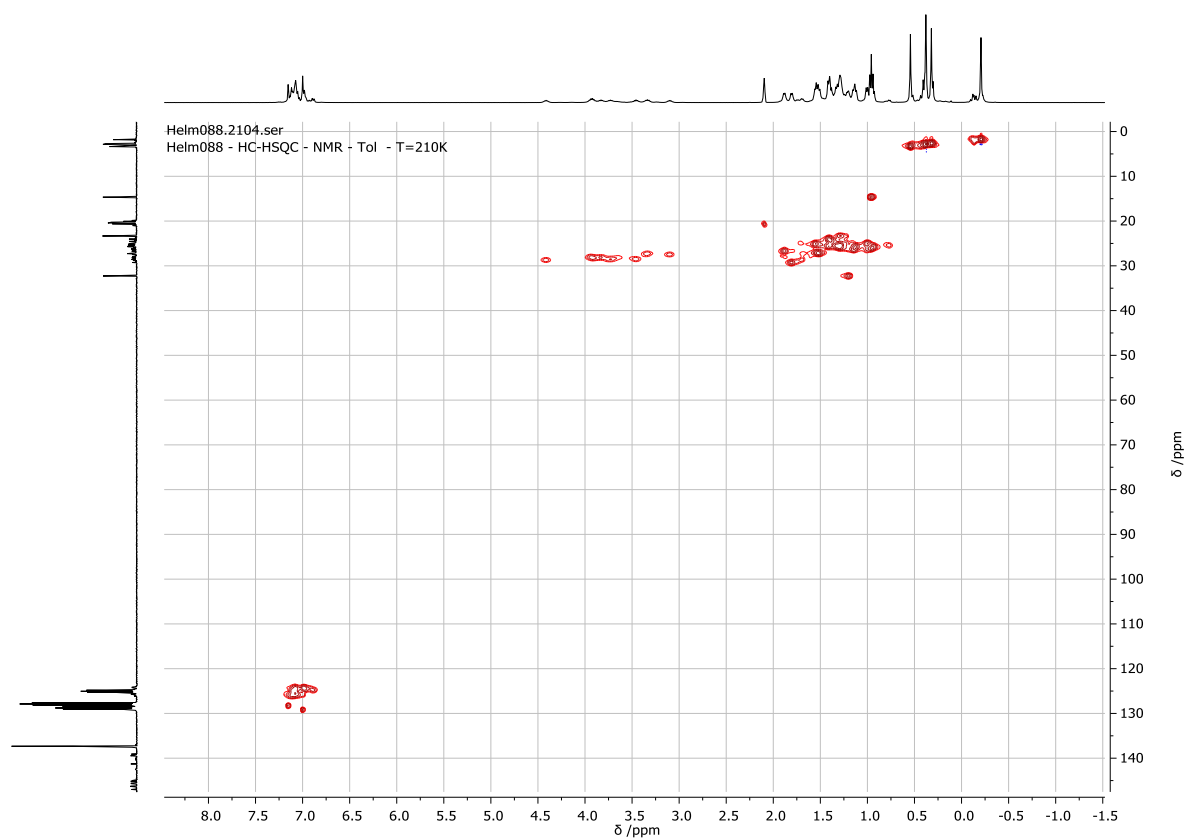

Figure S33. H,C-HSQC-NMR spectrum ( $d_8$ -toluene, 210 K) of **1**.

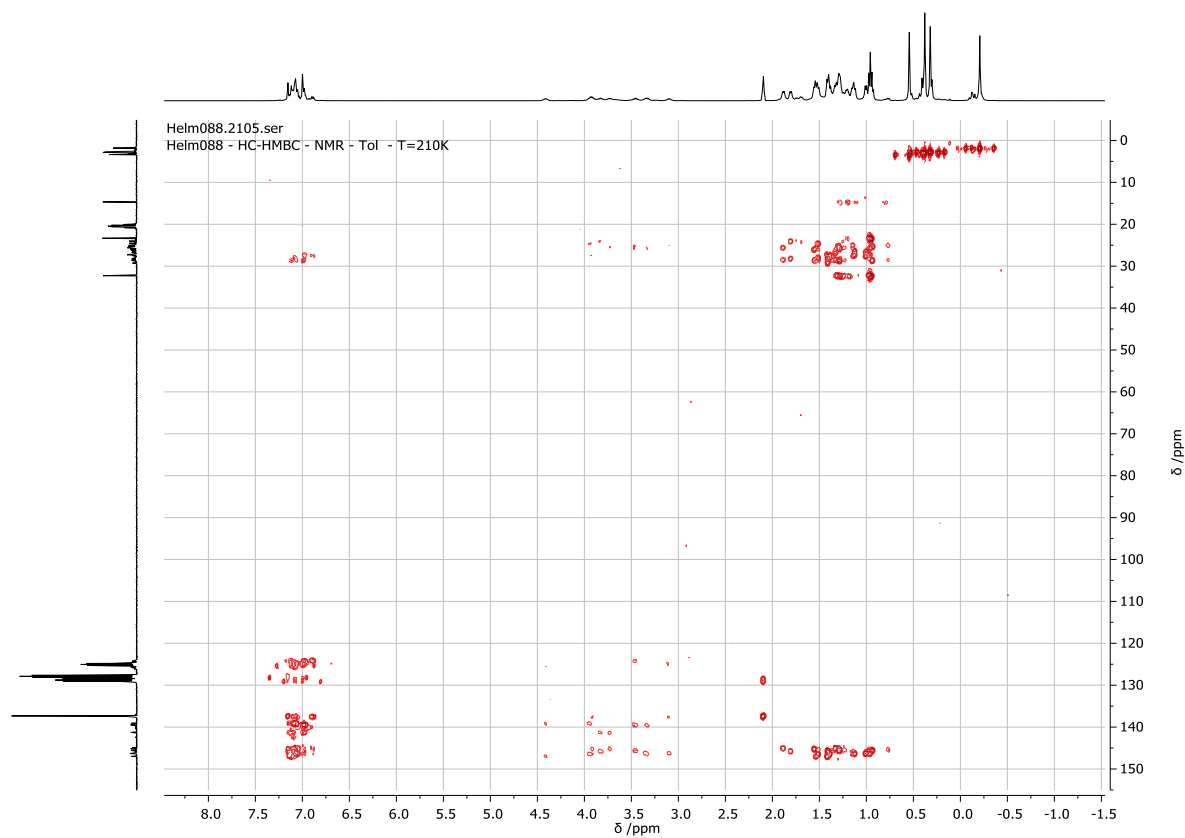

Figure S34. H,C-HMBC-NMR spectrum ( $d_8$ -toluene, 210 K) of **1**.

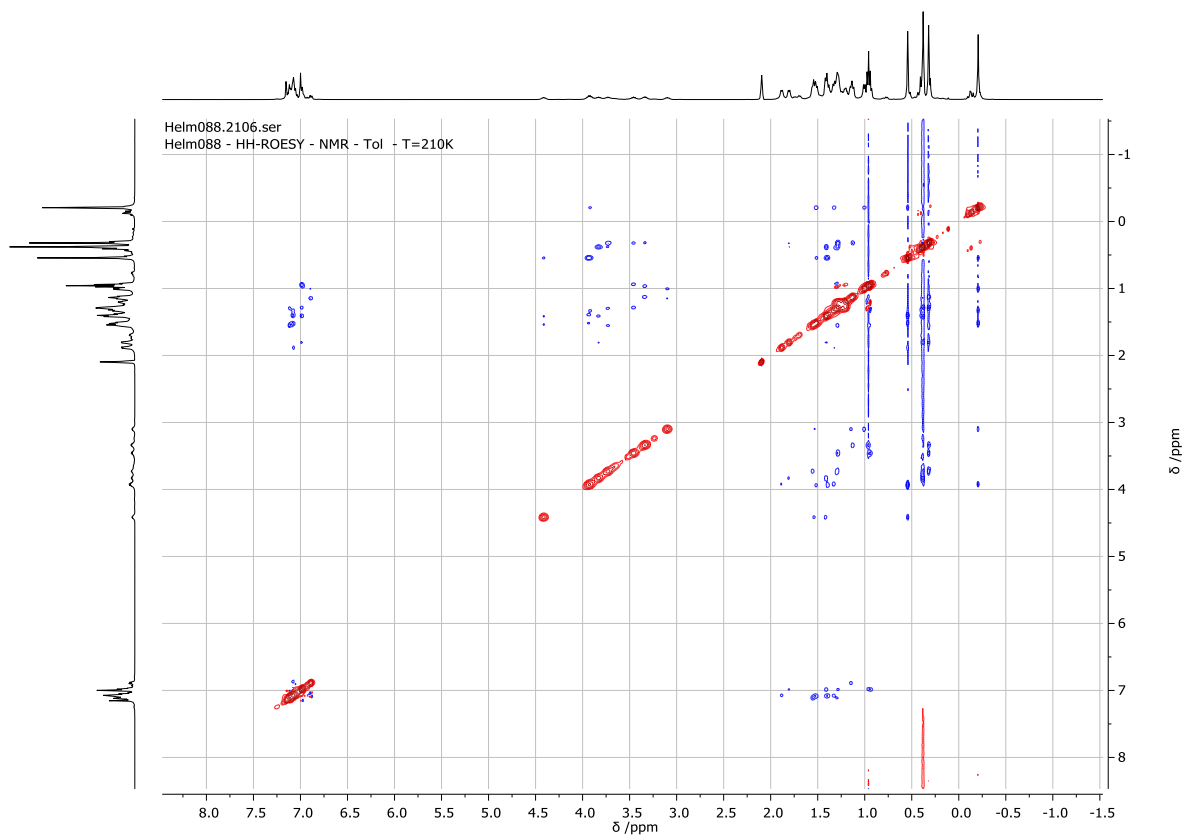

**Figure S35.** H,H-ROESY-NMR spectrum ( $d_8$ -toluene, 210 K) of **1**.

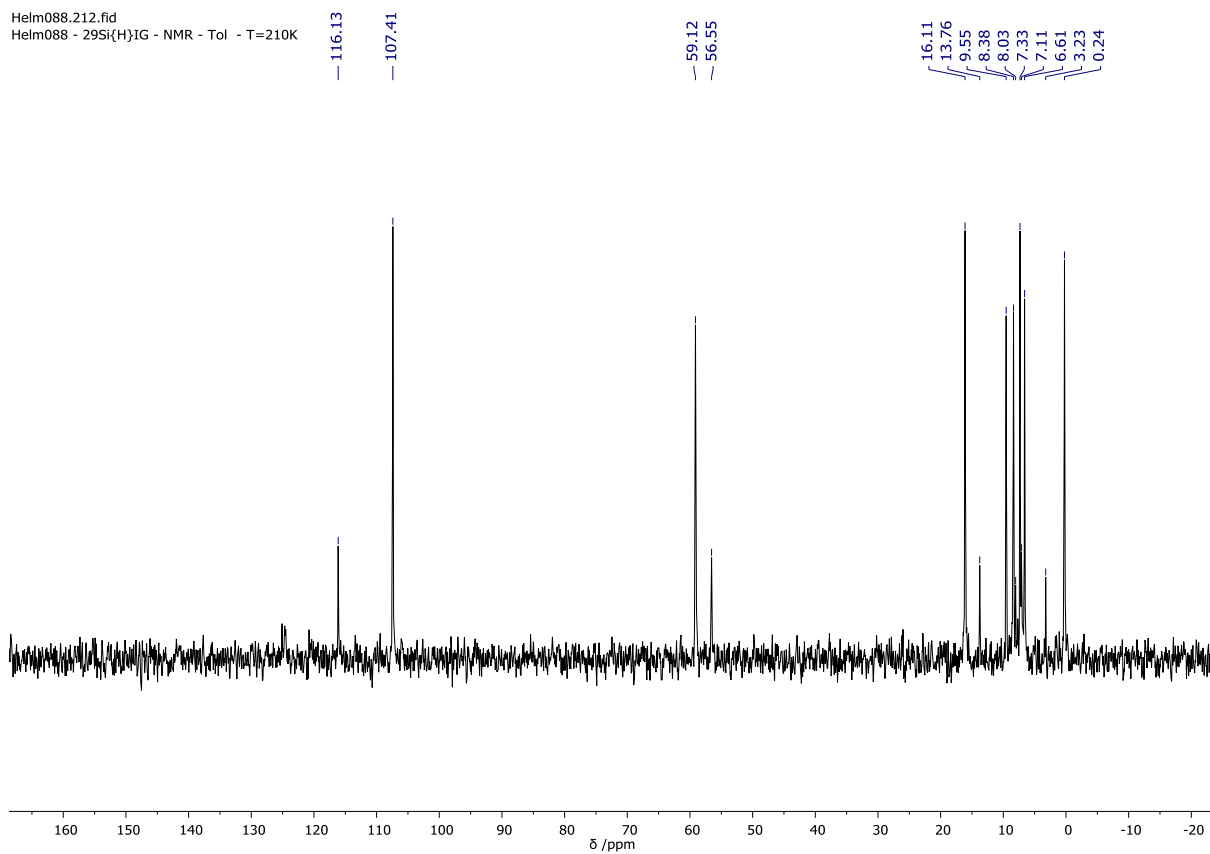

**Figure S36.**  $^{29}\text{Si}\{^1\text{H}\}$ IG-NMR spectrum ( $d_8$ -toluene, 210 K, 80MHz) of **1**.



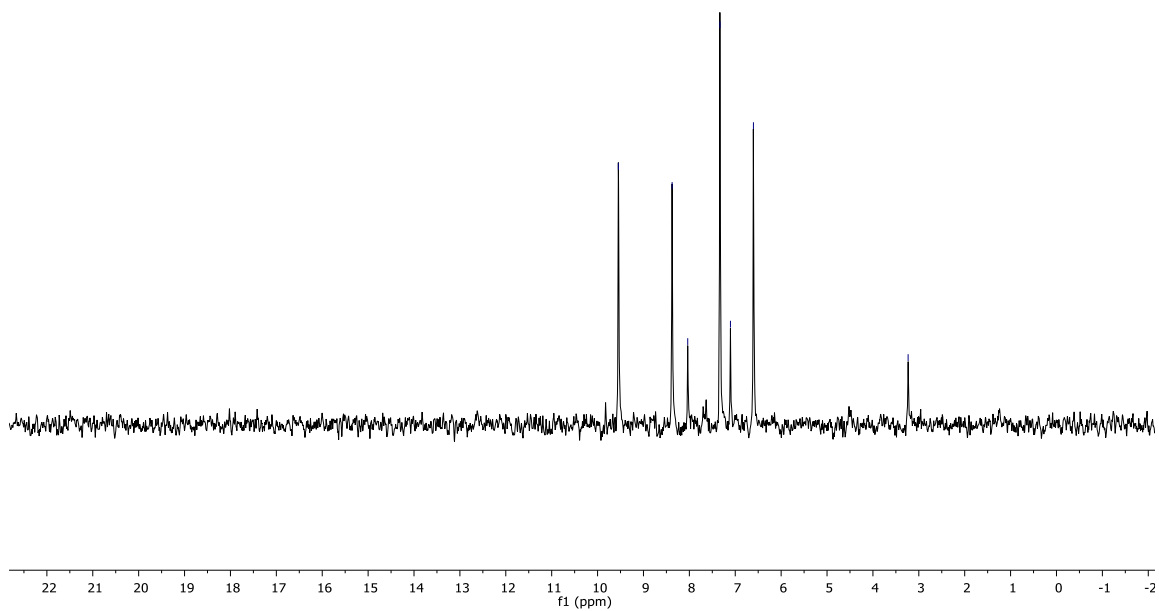

**Figure S37.**  $^{29}\text{Si}\{^1\text{H}\}$ DEPT19.5 NMR spectrum ( $d_8$ -toluene, 210 K, 80MHz) of **1**.

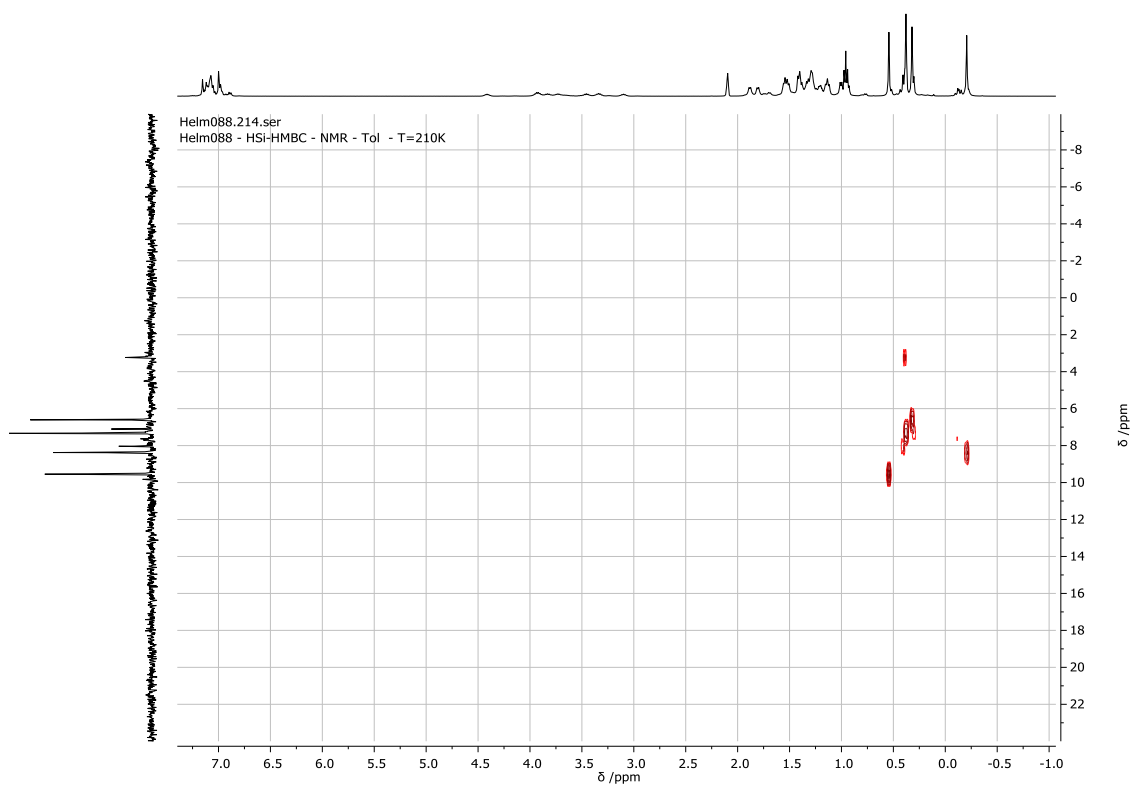

**Figure S38.** H,Si-HMBC-NMR spectrum ( $d_8$ -toluene, 210 K) of **1**.

## 7.4 Solution NMR spectra of 2

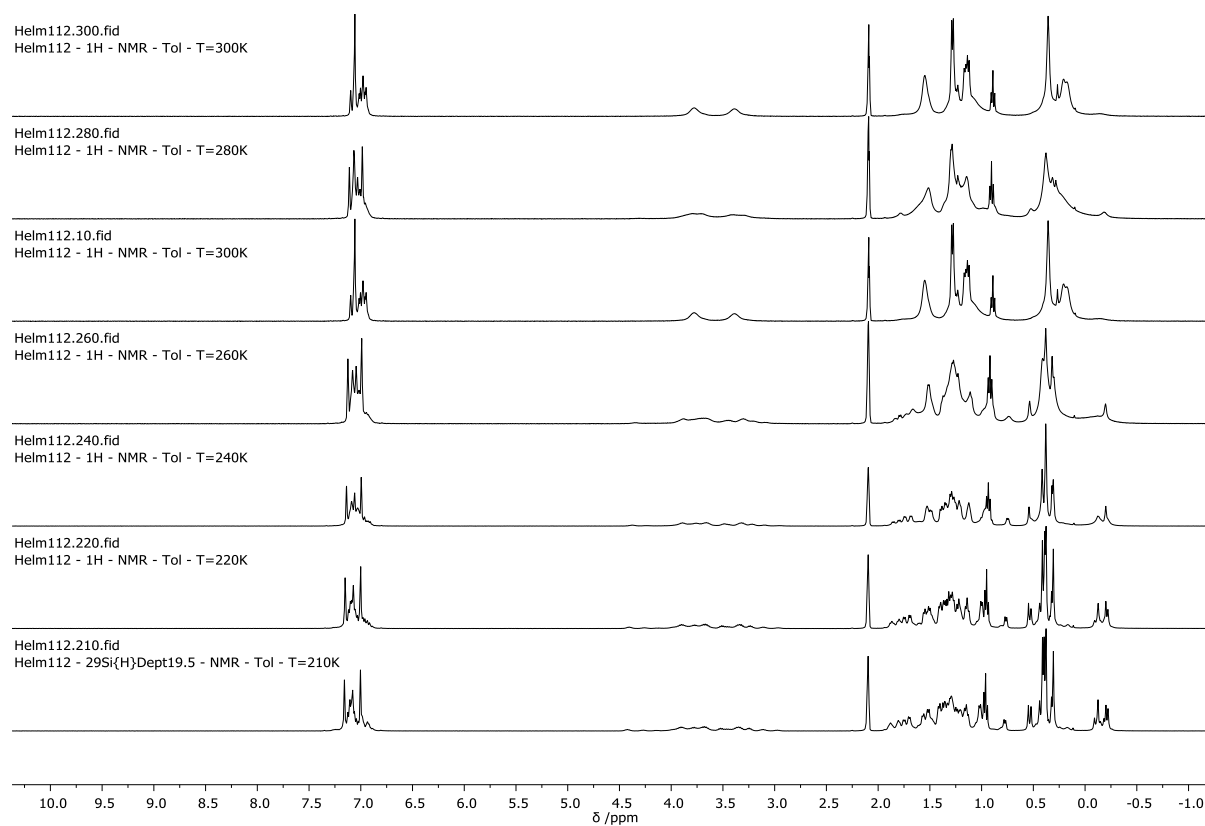

**Figure S39.** Variable temperature <sup>1</sup>H-NMR spectra (d<sub>8</sub>-toluene, 300-210 K, 400 MHz) of 2.

Helm112.212.fid  
Helm112 -  $^{29}\text{Si}\{^1\text{H}\}$ IG - NMR - Tol - T=210K

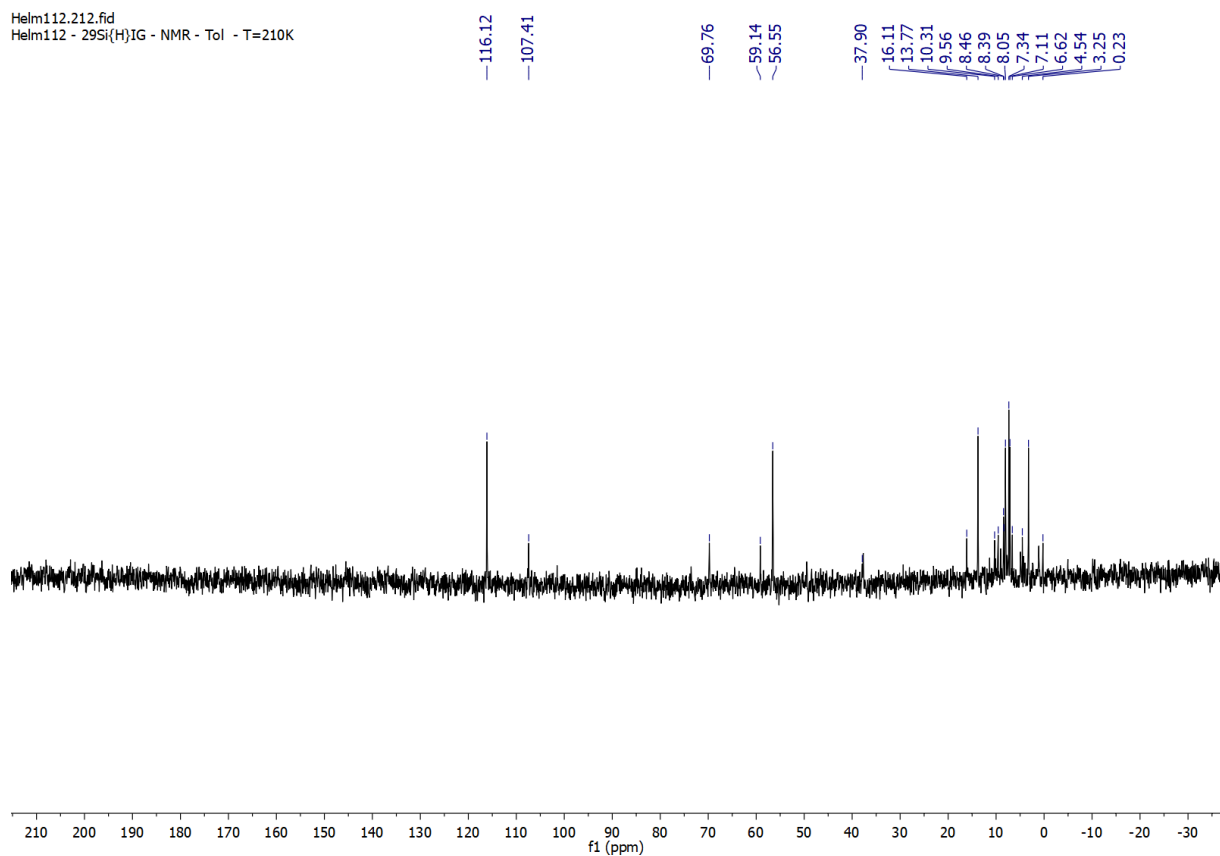

**Figure S40.**  $^{29}\text{Si}\{^1\text{H}\}$ IG NMR spectrum ( $d_8$ -toluene, 210 K, 80 MHz) of **2**.

Helm112.211.fid  
Helm112 -  $^{29}\text{Si}\{^1\text{H}\}$ Dept19.5 - NMR - Tol - T=210K

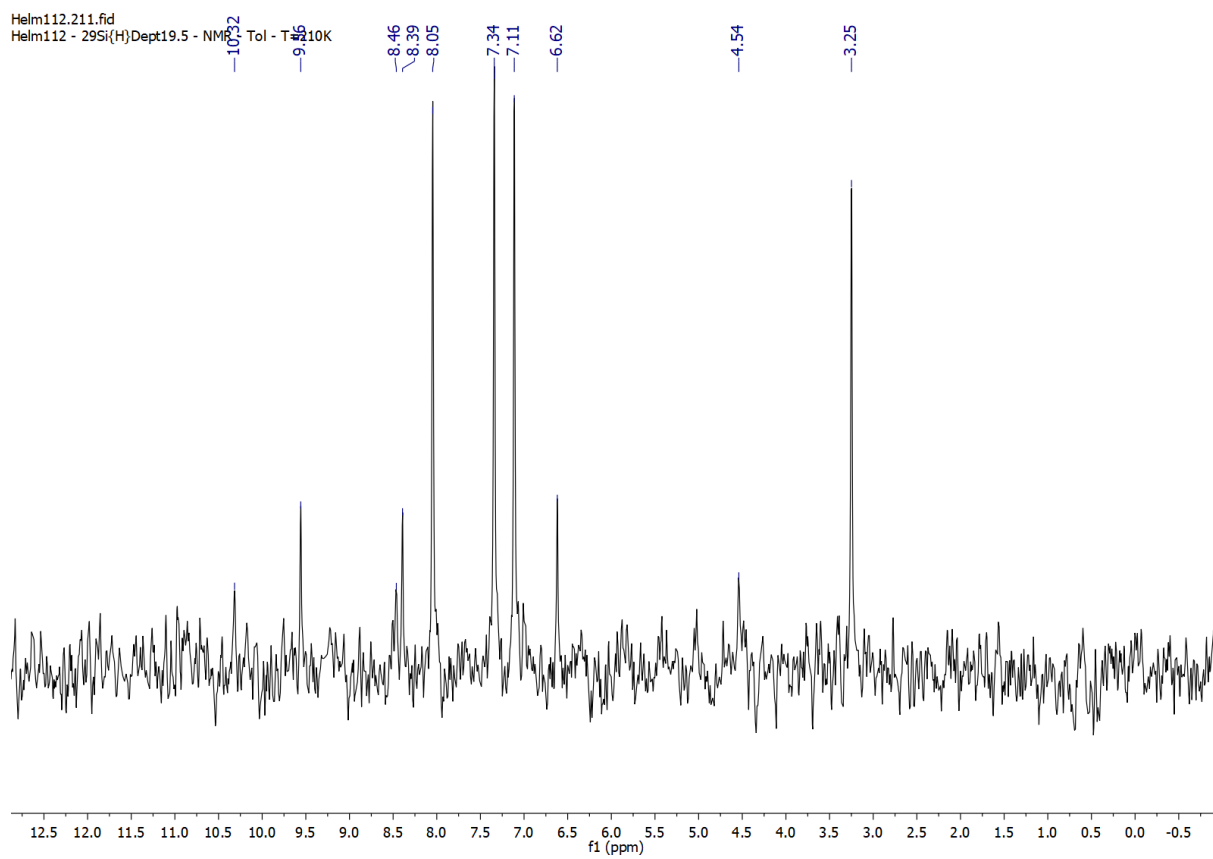

**Figure S41.**  $^{29}\text{Si}\{^1\text{H}\}$ DEPT19.5 NMR spectrum ( $d_8$ -toluene, 210 K, 80 MHz) of **2**.

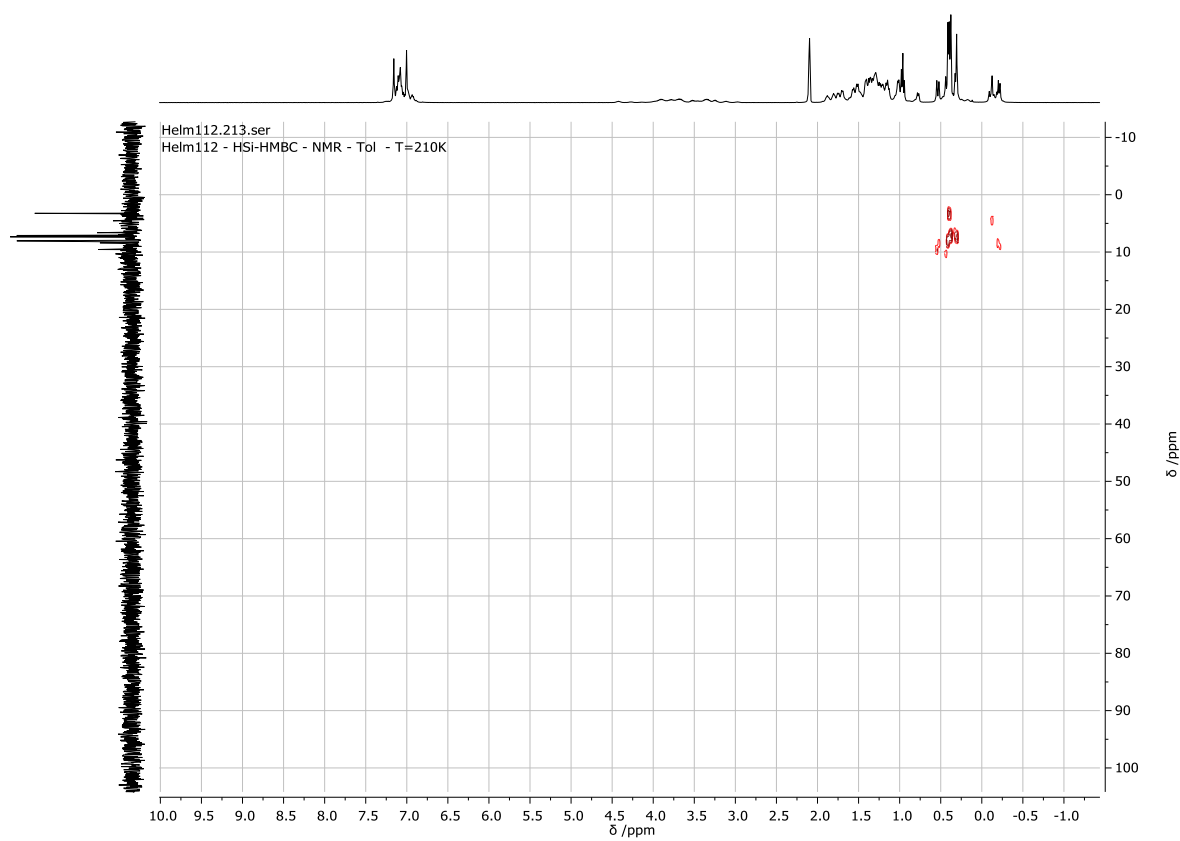

Figure S42. H,Si-HMBC-NMR spectrum ( $d_8$ -toluene, 210 K) of **2**.

## 8. Results from TDDFT calculations of models with N(SiH<sub>3</sub>)CH<sub>3</sub> substituents

### 8.1 TDDFT calculation for Si<sub>4</sub>Ge<sub>2</sub>{N(SiH<sub>3</sub>)CH<sub>3</sub>}<sub>4</sub>, Si<sub>3</sub>Ge<sub>3</sub>{N(SiH<sub>3</sub>)CH<sub>3</sub>}<sub>4</sub> and Si<sub>4</sub>Ge<sub>2</sub>{N(SiH<sub>3</sub>)CH<sub>3</sub>}<sub>4</sub>

#### General procedure

We have performed a TDDFT calculation with ORCA on the optimized structures of Si<sub>4</sub>Ge<sub>2</sub>{N(SiH<sub>3</sub>)CH<sub>3</sub>}<sub>4</sub>, Si<sub>3</sub>Ge<sub>3</sub>{N(SiH<sub>3</sub>)CH<sub>3</sub>}<sub>4</sub> and Si<sub>4</sub>Ge<sub>2</sub>{N(SiH<sub>3</sub>)CH<sub>3</sub>}<sub>4</sub> using the CAM-B3LYP functional, a double zeta basis set (def2-SVP) and the CPCM implicit solvent model for hexane solving for 140 excited states.

#### Si<sub>4</sub>Ge<sub>2</sub>{N(SiH<sub>3</sub>)CH<sub>3</sub>}<sub>4</sub>

The HOMO → LUMO transition at 368.4 nm (State 1) is very weak. The second intense absorption at 331.8 nm (State 2) is related to the HOMO−1 → LUMO transition (Figure S43). The weak absorptions at 302.8 and 301.1 nm (State 3 and State 4) represent mixed excitations that are mainly related to HOMO−2 → LUMO (State 3) and HOMO−3 → LUMO and HOMO−4 → LUMO (State 4).

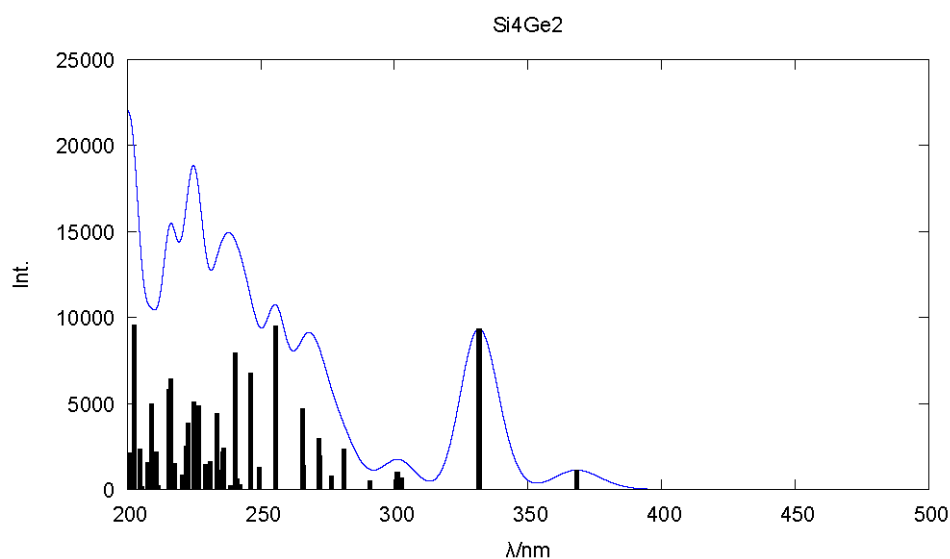

**Figure S43.** Calculated UV-Vis spectrum of Si<sub>4</sub>Ge<sub>2</sub>{N(SiH<sub>3</sub>)CH<sub>3</sub>}<sub>4</sub>.

#### ABSORPTION SPECTRUM VIA TRANSITION ELECTRIC DIPOLE MOMENTS

| State | Energy (cm <sup>-1</sup> ) | Wavelength (nm) | fosc        | T2 (au* <sup>2</sup> ) | TX (au)  | TY (au)  | TZ (au)  |
|-------|----------------------------|-----------------|-------------|------------------------|----------|----------|----------|
| 1     | 27147.2                    | 368.4           | 0.007715121 | 0.09356                | 0.09579  | -0.28331 | -0.06420 |
| 2     | 30143.0                    | 331.8           | 0.064704280 | 0.70668                | -0.55827 | 0.62839  | -0.01215 |
| 3     | 33021.7                    | 302.8           | 0.004706263 | 0.04692                | 0.07106  | -0.11983 | -0.16586 |
| 4     | 33207.8                    | 301.1           | 0.006938690 | 0.06879                | -0.13511 | 0.22346  | -0.02443 |
| 5     | 34384.2                    | 290.8           | 0.003269125 | 0.03130                | -0.15772 | 0.07972  | 0.00829  |
| 6     | 35573.1                    | 281.1           | 0.016310369 | 0.15094                | -0.30596 | 0.21477  | -0.10585 |
| 7     | 36181.5                    | 276.4           | 0.005500002 | 0.05004                | -0.19874 | 0.06728  | 0.07758  |
| 8     | 36779.5                    | 271.9           | 0.020534998 | 0.18381                | -0.05427 | 0.35349  | 0.23644  |
| 9     | 36768.1                    | 272.0           | 0.013376252 | 0.11977                | -0.28958 | 0.12545  | 0.14204  |
| 10    | 37607.0                    | 265.9           | 0.009577822 | 0.08384                | 0.04016  | -0.17956 | -0.22359 |

|    |         |       |              |         |          |          |          |
|----|---------|-------|--------------|---------|----------|----------|----------|
| 11 | 37656.4 | 265.6 | 0.032431869  | 0.28354 | 0.07418  | 0.52201  | -0.07440 |
| 12 | 39103.1 | 255.7 | 0.065787236  | 0.55387 | 0.34907  | 0.65728  | 0.00044  |
| 13 | 40097.0 | 249.4 | 0.008790874  | 0.07218 | -0.26247 | 0.04671  | 0.03325  |
| 14 | 40625.2 | 246.2 | 0.046666707  | 0.37817 | -0.19198 | 0.51975  | -0.26678 |
| 15 | 41289.5 | 242.2 | 0.001772186  | 0.01413 | -0.07583 | 0.07134  | 0.05736  |
| 16 | 41595.3 | 240.4 | 0.054964382  | 0.43502 | 0.30527  | -0.53291 | -0.24051 |
| 17 | 41474.2 | 241.1 | 0.004304950  | 0.03417 | 0.16442  | -0.08417 | 0.00727  |
| 18 | 41895.5 | 238.7 | 0.001501798  | 0.01180 | -0.05029 | -0.03521 | 0.08963  |
| 19 | 42365.8 | 236.0 | 0.016779231  | 0.13039 | 0.08471  | 0.24779  | -0.24861 |
| 20 | 42425.5 | 235.7 | 0.015078015  | 0.11700 | 0.10639  | 0.21305  | 0.24554  |
| 21 | 42511.8 | 235.2 | 0.007811100  | 0.06049 | 0.16003  | 0.17274  | 0.07100  |
| 22 | 42791.1 | 233.7 | 0.030424703  | 0.23407 | 0.29111  | -0.11141 | 0.37002  |
| 23 | 43250.9 | 231.2 | 0.011182476  | 0.08512 | -0.18674 | 0.13609  | 0.17812  |
| 24 | 43630.9 | 229.2 | 0.009942876  | 0.07502 | 0.24768  | -0.11596 | -0.01514 |
| 25 | 44105.0 | 226.7 | 0.033452442  | 0.24970 | -0.34494 | 0.26110  | 0.25009  |
| 26 | 44298.1 | 225.7 | 0.019007828  | 0.14126 | 0.28516  | -0.22619 | -0.09373 |
| 27 | 44442.3 | 225.0 | 0.035127831  | 0.26021 | 0.29844  | -0.40494 | -0.08468 |
| 28 | 44870.2 | 222.9 | 0.026632741  | 0.19540 | 0.29391  | -0.24881 | 0.21707  |
| 29 | 45000.3 | 222.2 | 0.017482113  | 0.12790 | 0.19896  | 0.28886  | 0.06977  |
| 30 | 45110.9 | 221.7 | 0.004469863  | 0.03262 | 0.04180  | -0.17450 | -0.02053 |
| 31 | 45309.4 | 220.7 | 0.005724657  | 0.04159 | -0.08333 | 0.18518  | -0.01898 |
| 32 | 45948.0 | 217.6 | 0.010500268  | 0.07523 | 0.13869  | 0.02325  | 0.23549  |
| 33 | 46247.4 | 216.2 | 0.044492943  | 0.31672 | -0.28879 | 0.44177  | -0.19535 |
| 34 | 46388.3 | 215.6 | 0.040261890  | 0.28573 | 0.09416  | 0.50893  | -0.13362 |
| 35 | 47260.8 | 211.6 | 0.001588891  | 0.01107 | -0.02269 | 0.00226  | 0.10270  |
| 36 | 47443.0 | 210.8 | 0.015136364  | 0.10503 | 0.07109  | -0.30724 | -0.07471 |
| 37 | 47832.5 | 209.1 | 0.034440836  | 0.23704 | 0.15146  | -0.45887 | -0.05952 |
| 38 | 48132.8 | 207.8 | 0.010606644  | 0.07255 | -0.19119 | 0.17399  | -0.07563 |
| 39 | 48653.5 | 205.5 | 0.001120516  | 0.00758 | 0.05161  | -0.03674 | 0.05974  |
| 40 | 48797.9 | 204.9 | 0.016159343  | 0.10902 | 0.12409  | -0.30200 | -0.04915 |
| 41 | 49349.7 | 202.6 | 0.065981967  | 0.44017 | 0.46668  | -0.45572 | -0.12125 |
| 42 | 49593.6 | 201.6 | 0.005731788  | 0.03805 | 0.01802  | -0.19422 | -0.00195 |
| 43 | 49661.8 | 201.4 | 0.014713753  | 0.09754 | -0.23467 | 0.18513  | -0.09051 |
| 44 | 49752.2 | 201.0 | 0.006772587  | 0.04481 | 0.14302  | 0.01058  | -0.15572 |
| 45 | 50087.3 | 199.7 | 0.037313785  | 0.24525 | 0.03315  | 0.45228  | 0.19898  |
| 46 | 50177.9 | 199.3 | 0.017422428  | 0.11431 | 0.02907  | 0.33453  | 0.03940  |
| 47 | 50487.1 | 198.1 | 0.003747726  | 0.02444 | -0.05601 | 0.14440  | -0.02119 |
| 48 | 50785.2 | 196.9 | 0.031386597  | 0.20346 | 0.02035  | -0.43429 | -0.12018 |
| 49 | 51140.8 | 195.5 | 0.030967335  | 0.19935 | -0.20625 | 0.34448  | 0.19530  |
| 50 | 51355.1 | 194.7 | 0.042075123  | 0.26972 | -0.50588 | -0.03781 | 0.11125  |
| 51 | 51381.5 | 194.6 | 0.049808317  | 0.31913 | -0.46568 | -0.09078 | 0.30665  |
| 52 | 51820.4 | 193.0 | 0.022273760  | 0.14150 | 0.05479  | -0.37146 | 0.02283  |
| 53 | 52388.1 | 190.9 | 0.011739322  | 0.07377 | 0.17829  | -0.05271 | -0.19801 |
| 54 | 52370.7 | 190.9 | 0.057763423  | 0.36311 | -0.22294 | 0.10800  | -0.54931 |
| 55 | 52798.6 | 189.4 | 0.0087112556 | 0.54317 | 0.44289  | -0.45596 | -0.37299 |
| 56 | 53310.4 | 187.6 | 0.013755952  | 0.08495 | 0.24334  | -0.04790 | -0.15310 |
| 57 | 53597.2 | 186.6 | 0.216998850  | 1.33288 | 0.79838  | -0.82126 | 0.14493  |
| 58 | 54643.5 | 183.0 | 0.062408203  | 0.37599 | 0.28373  | -0.32602 | 0.43497  |
| 59 | 54730.6 | 182.7 | 0.013531544  | 0.08139 | -0.22901 | -0.15627 | -0.06728 |
| 60 | 55475.5 | 180.3 | 0.200722089  | 1.19116 | -0.86189 | 0.65997  | -0.11291 |
| 61 | 55360.3 | 180.6 | 0.034900243  | 0.20754 | -0.29215 | 0.26208  | -0.23131 |
| 62 | 55691.4 | 179.6 | 0.007753886  | 0.04584 | 0.00539  | 0.10655  | 0.18562  |
| 63 | 56044.1 | 178.4 | 0.134838508  | 0.79206 | 0.02566  | 0.83862  | 0.29686  |
| 64 | 56230.0 | 177.8 | 0.035406258  | 0.20729 | 0.38831  | -0.18546 | -0.14870 |
| 65 | 56712.0 | 176.3 | 0.020513765  | 0.11908 | 0.19567  | 0.23745  | 0.15625  |
| 66 | 56783.4 | 176.1 | 0.048965073  | 0.28388 | 0.19722  | 0.46607  | -0.16663 |
| 67 | 57275.4 | 174.6 | 0.010630105  | 0.06110 | 0.18648  | -0.15813 | -0.03636 |
| 68 | 57269.4 | 174.6 | 0.053426764  | 0.30712 | -0.05616 | 0.54616  | -0.07532 |
| 69 | 57729.3 | 173.2 | 0.045461158  | 0.25925 | 0.43018  | 0.07515  | -0.26182 |
| 70 | 58041.9 | 172.3 | 0.003395273  | 0.01926 | 0.06388  | 0.09837  | -0.07416 |
| 71 | 57696.3 | 173.3 | 0.051876123  | 0.29600 | -0.36612 | -0.29111 | -0.27787 |
| 72 | 58556.7 | 170.8 | 0.045173566  | 0.25397 | 0.38091  | 0.30610  | 0.12321  |
| 73 | 58110.2 | 172.1 | 0.159676016  | 0.90461 | -0.04269 | 0.85503  | -0.41438 |
| 74 | 58461.4 | 171.1 | 0.058220803  | 0.32786 | -0.44555 | 0.23943  | -0.26837 |
| 75 | 59179.5 | 169.0 | 0.035527217  | 0.19764 | -0.02063 | -0.30295 | -0.32470 |
| 76 | 59405.8 | 168.3 | 0.048462478  | 0.26857 | -0.44212 | 0.25941  | -0.07619 |
| 77 | 58992.5 | 169.5 | 0.104342003  | 0.58229 | 0.35769  | -0.52286 | -0.42539 |
| 78 | 59531.2 | 168.0 | 0.085690492  | 0.47387 | -0.58164 | 0.28330  | 0.23519  |
| 79 | 59846.0 | 167.1 | 0.117778617  | 0.64790 | 0.13593  | -0.15369 | -0.77833 |
| 80 | 60038.3 | 166.6 | 0.166953559  | 0.91547 | -0.62326 | -0.36352 | 0.62839  |
| 81 | 60461.4 | 165.4 | 0.125086741  | 0.68110 | -0.14887 | 0.03690  | -0.81091 |
| 82 | 60467.7 | 165.4 | 0.029453722  | 0.16036 | -0.38718 | -0.09763 | -0.03025 |
| 83 | 60767.4 | 164.6 | 0.074393767  | 0.40303 | 0.01505  | -0.20222 | 0.60159  |
| 84 | 60629.1 | 164.9 | 0.035389402  | 0.19216 | 0.21153  | 0.16120  | 0.34847  |
| 85 | 60909.4 | 164.2 | 0.094286910  | 0.50962 | -0.68951 | 0.12689  | 0.13450  |
| 86 | 60529.8 | 165.2 | 0.046518344  | 0.25301 | -0.02524 | 0.35214  | 0.35829  |
| 87 | 60999.9 | 163.9 | 0.003073859  | 0.01659 | -0.06562 | 0.02165  | -0.10869 |
| 88 | 61699.2 | 162.1 | 0.106353968  | 0.56748 | -0.63437 | -0.32352 | -0.24574 |
| 89 | 61795.1 | 161.8 | 0.044518233  | 0.23717 | 0.17432  | 0.39911  | -0.21792 |
| 90 | 61916.6 | 161.5 | 0.026614926  | 0.14151 | 0.18910  | -0.32371 | -0.03108 |
| 91 | 61689.7 | 162.1 | 0.074685807  | 0.39857 | 0.27048  | 0.03798  | -0.56918 |
| 92 | 61924.8 | 161.5 | 0.123160231  | 0.65476 | 0.15460  | 0.47920  | 0.63342  |
| 93 | 62314.4 | 160.5 | 0.090855616  | 0.48000 | 0.37311  | -0.41291 | -0.41266 |
| 94 | 62579.7 | 159.8 | 0.000324349  | 0.00171 | 0.03015  | -0.02684 | 0.00877  |
| 95 | 62611.0 | 159.7 | 0.077245141  | 0.40616 | 0.20099  | -0.40248 | 0.45141  |
| 96 | 62519.5 | 160.0 | 0.031485791  | 0.16580 | 0.26899  | 0.29642  | 0.07467  |

|     |         |       |             |         |          |          |          |
|-----|---------|-------|-------------|---------|----------|----------|----------|
| 97  | 62785.4 | 159.3 | 0.102554315 | 0.53774 | 0.10498  | 0.23998  | -0.68493 |
| 98  | 62668.1 | 159.6 | 0.007313083 | 0.03842 | -0.16237 | 0.05279  | -0.09626 |
| 99  | 63315.2 | 157.9 | 0.066788257 | 0.34727 | -0.44286 | 0.21820  | 0.32177  |
| 100 | 63333.7 | 157.9 | 0.071232885 | 0.37027 | -0.19451 | 0.18162  | 0.54722  |
| 101 | 63250.9 | 158.1 | 0.086333665 | 0.44935 | 0.26594  | -0.13056 | 0.60132  |
| 102 | 63445.1 | 157.6 | 0.037293826 | 0.19351 | 0.11832  | -0.40783 | 0.11486  |
| 103 | 63538.3 | 157.4 | 0.075401652 | 0.39068 | -0.49026 | 0.05463  | -0.38385 |
| 104 | 63553.7 | 157.3 | 0.061791803 | 0.32009 | 0.27179  | -0.48566 | 0.10172  |
| 105 | 64222.5 | 155.7 | 0.040101877 | 0.20557 | 0.03982  | 0.32228  | 0.31641  |
| 106 | 64343.3 | 155.4 | 0.053154228 | 0.27196 | -0.43585 | 0.27256  | -0.08781 |
| 107 | 64407.9 | 155.3 | 0.079938610 | 0.40859 | -0.25352 | 0.15903  | -0.56483 |
| 108 | 64482.4 | 155.1 | 0.010017295 | 0.05114 | 0.09628  | 0.09339  | -0.18208 |
| 109 | 64084.4 | 156.0 | 0.012363138 | 0.06351 | 0.17106  | 0.12724  | -0.13439 |
| 110 | 64501.2 | 155.0 | 0.031045808 | 0.15846 | 0.07449  | -0.11301 | 0.37435  |
| 111 | 64965.6 | 153.9 | 0.005694444 | 0.02886 | -0.15109 | -0.06743 | -0.03850 |
| 112 | 65081.6 | 153.7 | 0.078072760 | 0.39493 | -0.07249 | 0.62127  | -0.06075 |
| 113 | 64809.8 | 154.3 | 0.005643858 | 0.02867 | 0.11908  | -0.03049 | 0.11644  |
| 114 | 64772.4 | 154.4 | 0.114785633 | 0.58341 | -0.28512 | 0.67006  | 0.23052  |
| 115 | 65279.1 | 153.2 | 0.037073141 | 0.18697 | -0.35637 | 0.23689  | 0.06205  |
| 116 | 65589.5 | 152.5 | 0.065686720 | 0.32970 | -0.39214 | 0.37491  | 0.18807  |
| 117 | 65035.0 | 153.8 | 0.010139174 | 0.05133 | -0.00499 | -0.19809 | -0.10982 |
| 118 | 65284.3 | 153.2 | 0.025108096 | 0.12661 | -0.34015 | -0.09106 | 0.05119  |
| 119 | 65369.5 | 153.0 | 0.005237568 | 0.02638 | -0.13585 | -0.02540 | 0.08530  |
| 120 | 65707.1 | 152.2 | 0.062899683 | 0.31515 | 0.55766  | -0.06140 | 0.01976  |
| 121 | 65934.1 | 151.7 | 0.055234139 | 0.27579 | -0.12822 | -0.44194 | -0.25305 |
| 122 | 65548.3 | 152.6 | 0.050548680 | 0.25388 | 0.31945  | -0.37588 | -0.10268 |
| 123 | 65917.8 | 151.7 | 0.071586636 | 0.35752 | -0.49499 | -0.26924 | -0.20004 |
| 124 | 66151.9 | 151.2 | 0.003774266 | 0.01878 | 0.09404  | -0.09638 | -0.02548 |
| 125 | 66343.7 | 150.7 | 0.021812534 | 0.10824 | 0.05205  | -0.24881 | -0.20887 |
| 126 | 66445.8 | 150.5 | 0.107983680 | 0.53501 | 0.24459  | -0.58071 | -0.37144 |
| 127 | 66821.6 | 149.7 | 0.016984508 | 0.08368 | 0.14470  | -0.20042 | -0.15023 |
| 128 | 66163.2 | 151.1 | 0.174980774 | 0.87066 | 0.79341  | -0.48031 | -0.10231 |
| 129 | 66584.7 | 150.2 | 0.002662243 | 0.01316 | 0.02763  | -0.02618 | 0.10823  |
| 130 | 67106.3 | 149.0 | 0.066710383 | 0.32727 | -0.05137 | 0.16607  | 0.54502  |
| 131 | 66624.9 | 150.1 | 0.052990106 | 0.26184 | 0.40723  | -0.30888 | 0.02447  |
| 132 | 67328.5 | 148.5 | 0.040514427 | 0.19810 | 0.32265  | 0.25283  | 0.17342  |
| 133 | 67125.0 | 149.0 | 0.000642336 | 0.00315 | -0.04696 | 0.00050  | -0.03074 |
| 134 | 67425.8 | 148.3 | 0.034039020 | 0.16620 | -0.19322 | 0.05063  | 0.35539  |
| 135 | 66948.8 | 149.4 | 0.060498570 | 0.29749 | 0.37779  | -0.06931 | -0.38725 |
| 136 | 67323.4 | 148.5 | 0.014824367 | 0.07249 | -0.18882 | -0.19178 | 0.00769  |
| 137 | 67517.1 | 148.1 | 0.018373488 | 0.08959 | -0.18980 | 0.17091  | -0.15606 |
| 138 | 67597.2 | 147.9 | 0.042713374 | 0.20802 | 0.01909  | -0.04401 | -0.45357 |
| 139 | 67148.8 | 148.9 | 0.005840741 | 0.02864 | 0.12096  | 0.09081  | -0.07588 |
| 140 | 67865.5 | 147.4 | 0.017018761 | 0.08256 | 0.00848  | 0.06665  | 0.27936  |

STATE 1: E= 0.123692 au 3.366 eV 27147.2 cm<sup>-1</sup> (368.4 nm)

124a -> 126a : 0.090635 (c= -0.30105628)  
 125a -> 126a : 0.860169 (c= -0.92745284) HOMO → LUMO

STATE 2: E= 0.137342 au 3.737 eV 30143.0 cm<sup>-1</sup> (331.8 nm)

122a -> 126a : 0.022023 (c= 0.14840013)  
 124a -> 126a : 0.788191 (c= -0.88780148) HOMO-1 → LUMO  
 124a -> 127a : 0.012310 (c= -0.11095177)  
 125a -> 126a : 0.068623 (c= 0.26195923)

STATE 3: E= 0.150458 au 4.094 eV 33021.7 cm<sup>-1</sup> (302.8 nm)

121a -> 126a : 0.048726 (c= 0.22074047)  
 122a -> 126a : 0.179718 (c= 0.42393205)  
 123a -> 126a : 0.691488 (c= 0.83155752) HOMO-2 → LUMO  
 125a -> 127a : 0.019591 (c= 0.13996878)

STATE 4: E= 0.151306 au 4.117 eV 33207.8 cm<sup>-1</sup> (301.1 nm)

121a -> 126a : 0.234973 (c= -0.48473977) HOMO-4 → LUMO  
 122a -> 126a : 0.415689 (c= -0.64473917) HOMO-3 → LUMO  
 123a -> 126a : 0.188102 (c= 0.43370752)  
 125a -> 127a : 0.066100 (c= 0.25710000)  
 125a -> 129a : 0.027815 (c= -0.16677897)

STATE 5: E= 0.156666 au 4.263 eV 34384.2 cm<sup>-1</sup> (290.8 nm)

116a -> 126a : 0.010291 (c= -0.10144268)  
 121a -> 126a : 0.259556 (c= 0.50946663) HOMO-4 → LUMO  
 122a -> 126a : 0.215365 (c= -0.46407488) HOMO-3 → LUMO  
 123a -> 126a : 0.041023 (c= 0.20254237)  
 124a -> 127a : 0.080724 (c= -0.28411996)  
 125a -> 127a : 0.336543 (c= -0.58012305) HOMO → LUMO+1

STATE 6: E= 0.162083 au 4.411 eV 35573.1 cm<sup>-1</sup> (281.1 nm)

121a -> 126a : 0.161965 (c= 0.40244909)

```

122a -> 126a :    0.033928 (c= -0.18419669)
124a -> 127a :    0.511136 (c=  0.71493761)          HOMO-1 → LUMO+1
124a -> 128a :    0.033325 (c=  0.18255232)
125a -> 127a :    0.025967 (c=  0.16114303)
125a -> 128a :    0.134447 (c=  0.36666977)
125a -> 130a :    0.014466 (c= -0.12027356)

STATE 7: E=  0.164855 au    4.486 eV   36181.5 cm**-1 (276.4 nm)
120a -> 126a :    0.690896 (c= -0.83120133)          HOMO-5 → LUMO
121a -> 126a :    0.018657 (c= -0.13659206)
124a -> 128a :    0.071976 (c=  0.26828385)
124a -> 129a :    0.067964 (c=  0.26069978)
125a -> 128a :    0.051814 (c= -0.22762765)

STATE 8: E=  0.167580 au    4.560 eV   36779.5 cm**-1 (271.9 nm)
120a -> 126a :    0.046556 (c=  0.21576782)
121a -> 126a :    0.050273 (c=  0.22421622)
122a -> 126a :    0.023977 (c= -0.15484662)
124a -> 127a :    0.033885 (c= -0.18408008)
124a -> 128a :    0.093915 (c=  0.30645494)
124a -> 129a :    0.173257 (c=  0.41624158)          HOMO-1 → LUMO+3
125a -> 127a :    0.147282 (c=  0.38377302)          HOMO → LUMO+1
125a -> 128a :    0.167883 (c= -0.40973526)          HOMO → LUMO+2
125a -> 129a :    0.183816 (c=  0.42873784)          HOMO → LUMO+3
125a -> 131a :    0.010287 (c=  0.10142470)

STATE 9: E=  0.167528 au    4.559 eV   36768.1 cm**-1 (272.0 nm)
120a -> 126a :    0.012929 (c=  0.11370769)
121a -> 126a :    0.050087 (c=  0.22380158)
123a -> 126a :    0.016193 (c= -0.12725006)
123a -> 129a :    0.014372 (c= -0.11988335)
124a -> 127a :    0.022216 (c=  0.14905119)
124a -> 129a :    0.170707 (c= -0.41316746)          HOMO-1 → LUMO+3
124a -> 130a :    0.021086 (c= -0.14521182)
125a -> 128a :    0.338014 (c= -0.58138948)          HOMO → LUMO+2
125a -> 129a :    0.239228 (c= -0.48910954)          HOMO → LUMO+3
125a -> 131a :    0.025073 (c=  0.15834486)

STATE 10: E=  0.171350 au    4.663 eV   37607.0 cm**-1 (265.9 nm)
120a -> 126a :    0.016684 (c=  0.12916740)
121a -> 126a :    0.010428 (c= -0.10211564)
124a -> 127a :    0.040822 (c= -0.20204495)
124a -> 128a :    0.651003 (c=  0.80684744)          HOMO-1 → LUMO+2
124a -> 129a :    0.048849 (c= -0.22101896)
124a -> 131a :    0.030404 (c= -0.17436859)
125a -> 128a :    0.066011 (c=  0.25692638)
125a -> 129a :    0.026922 (c= -0.16408027)

```



## Si<sub>3</sub>Ge<sub>3</sub>{N(SiH<sub>3</sub>)CH<sub>3</sub>}<sub>4</sub>

The HOMO → LUMO transition at 376.8 nm (State 1) is weak. The second absorption at 348.4 nm (State 2) is also weak and related to the HOMO-1 → LUMO transition (Figure S44). The more stronger absorption at 271.3 nm (State 10) is related to a mixed excitation involving the transitions HOMO-5 → LUMO and HOMO → LUMO+2.

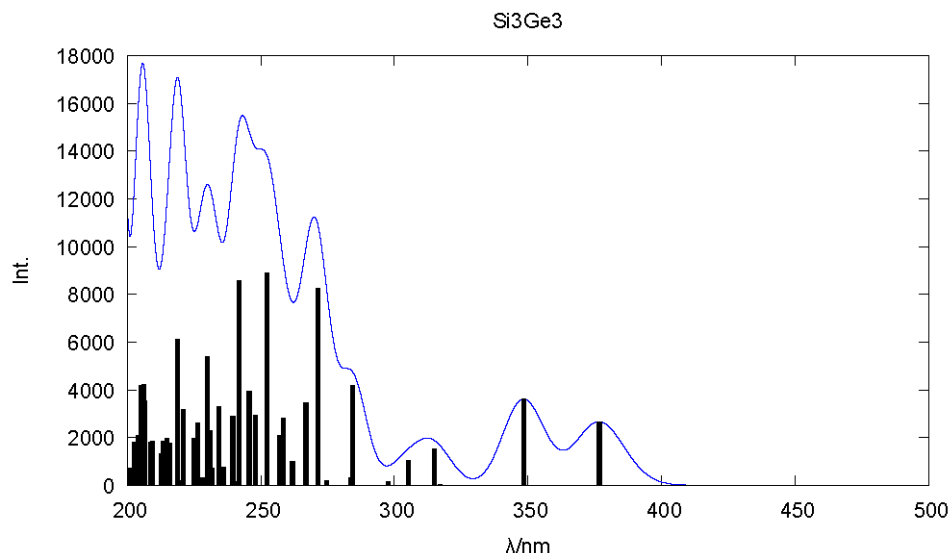

**Figure S44.** Calculated UV-Vis spectrum of Si<sub>3</sub>Ge<sub>3</sub>{N(SiH<sub>3</sub>)CH<sub>3</sub>}<sub>4</sub>.

### ABSORPTION SPECTRUM VIA TRANSITION ELECTRIC DIPOLE MOMENTS

| State | Energy (cm <sup>-1</sup> ) | Wavelength (nm) | fosc        | T2 (au**2) | TX (au)  | TY (au)  | TZ (au)  |
|-------|----------------------------|-----------------|-------------|------------|----------|----------|----------|
| 1     | 26542.7                    | 376.8           | 0.018395494 | 0.22816    | -0.11717 | -0.45955 | -0.05695 |
| 2     | 28702.9                    | 348.4           | 0.024998196 | 0.28672    | 0.29609  | 0.43474  | -0.10029 |
| 3     | 31524.9                    | 317.2           | 0.000348885 | 0.00364    | 0.00410  | -0.05146 | 0.03127  |
| 4     | 31743.4                    | 315.0           | 0.010620481 | 0.11015    | 0.14714  | 0.29731  | 0.00996  |
| 5     | 32748.8                    | 305.4           | 0.007081595 | 0.07119    | 0.13038  | 0.22678  | -0.05255 |
| 6     | 33590.3                    | 297.7           | 0.001104384 | 0.01082    | -0.01911 | -0.09729 | 0.03152  |
| 7     | 35266.1                    | 283.6           | 0.002057893 | 0.01921    | 0.04708  | 0.11354  | -0.06405 |
| 8     | 35170.2                    | 284.3           | 0.028918354 | 0.27069    | 0.11930  | 0.50542  | 0.03176  |
| 9     | 36421.3                    | 274.6           | 0.001352013 | 0.01222    | 0.00186  | 0.10982  | -0.01252 |
| 10    | 36855.6                    | 271.3           | 0.056979538 | 0.50897    | 0.58626  | 0.39569  | 0.09327  |
| 11    | 37454.2                    | 267.0           | 0.024011953 | 0.21106    | -0.27782 | 0.36567  | -0.01277 |
| 12    | 38178.9                    | 261.9           | 0.007045200 | 0.06075    | -0.22467 | 0.04268  | 0.09193  |
| 13    | 38674.8                    | 258.6           | 0.019411809 | 0.16524    | 0.18495  | -0.33470 | -0.13786 |
| 14    | 38898.6                    | 257.1           | 0.014544388 | 0.12309    | -0.01119 | -0.25846 | 0.23699  |
| 15    | 39622.3                    | 252.4           | 0.061485776 | 0.51087    | -0.50767 | -0.50234 | 0.02832  |
| 16    | 40321.7                    | 248.0           | 0.020441540 | 0.16690    | -0.06209 | -0.33386 | -0.22711 |
| 17    | 40705.4                    | 245.7           | 0.027241836 | 0.22032    | 0.05752  | -0.46270 | -0.05408 |
| 18    | 41321.5                    | 242.0           | 0.059352034 | 0.47286    | -0.12495 | -0.63821 | -0.22347 |
| 19    | 41468.8                    | 241.1           | 0.001087578 | 0.00863    | -0.08200 | -0.01702 | 0.04024  |
| 20    | 41739.4                    | 239.6           | 0.020045052 | 0.15810    | -0.17885 | 0.33036  | -0.13030 |
| 21    | 42369.8                    | 236.0           | 0.005182134 | 0.04027    | -0.05989 | 0.10084  | -0.16282 |
| 22    | 42692.4                    | 234.2           | 0.022723130 | 0.17522    | -0.11426 | -0.25676 | 0.31023  |
| 23    | 43156.9                    | 231.7           | 0.005016449 | 0.03827    | 0.09596  | 0.11344  | -0.12724 |
| 24    | 43280.9                    | 231.0           | 0.015727648 | 0.11963    | -0.20273 | -0.18451 | -0.21092 |
| 25    | 43499.6                    | 229.9           | 0.037214011 | 0.28164    | -0.39131 | -0.31930 | 0.16300  |
| 26    | 43836.8                    | 228.1           | 0.002185880 | 0.01642    | -0.01828 | 0.12440  | 0.02463  |
| 27    | 44147.5                    | 226.5           | 0.017987786 | 0.13414    | 0.33914  | -0.07368 | 0.11700  |
| 28    | 44287.1                    | 225.8           | 0.002392278 | 0.01778    | -0.04371 | 0.02204  | -0.12404 |
| 29    | 44466.3                    | 224.9           | 0.013644671 | 0.10102    | -0.00299 | -0.17717 | -0.26386 |
| 30    | 45213.6                    | 221.2           | 0.022112701 | 0.16101    | 0.03824  | -0.10231 | -0.38611 |
| 31    | 45403.8                    | 220.2           | 0.001224550 | 0.00888    | -0.06107 | -0.07137 | -0.00747 |
| 32    | 45675.5                    | 218.9           | 0.042165871 | 0.30392    | 0.26945  | 0.47453  | -0.07831 |
| 33    | 45681.7                    | 218.9           | 0.037147828 | 0.26771    | 0.12018  | 0.45069  | -0.22393 |
| 34    | 46271.7                    | 216.1           | 0.012103116 | 0.08611    | 0.10415  | 0.26623  | -0.06623 |
| 35    | 46505.2                    | 215.0           | 0.013582640 | 0.09615    | -0.11826 | 0.28175  | 0.05277  |
| 36    | 46854.8                    | 213.4           | 0.012670045 | 0.08902    | 0.02697  | -0.11461 | 0.27415  |
| 37    | 47002.8                    | 212.8           | 0.009259364 | 0.06485    | 0.03638  | 0.13291  | 0.21416  |

|     |         |       |             |         |          |          |          |
|-----|---------|-------|-------------|---------|----------|----------|----------|
| 38  | 47718.4 | 209.6 | 0.012856326 | 0.08870 | 0.00243  | 0.29586  | -0.03406 |
| 39  | 47928.3 | 208.6 | 0.012526215 | 0.08604 | 0.02987  | 0.22008  | -0.19160 |
| 40  | 48371.4 | 206.7 | 0.024429009 | 0.16626 | -0.16109 | -0.28914 | -0.23814 |
| 41  | 48733.6 | 205.2 | 0.028998322 | 0.19589 | 0.39852  | -0.01178 | 0.19219  |
| 42  | 49019.0 | 204.0 | 0.014345864 | 0.09635 | 0.09853  | 0.29241  | -0.03371 |
| 43  | 48467.4 | 206.3 | 0.029252795 | 0.19870 | 0.20396  | -0.25369 | -0.30454 |
| 44  | 49293.7 | 202.9 | 0.012483434 | 0.08337 | 0.26793  | -0.09355 | -0.05323 |
| 45  | 48890.2 | 204.5 | 0.010388189 | 0.06995 | -0.24736 | 0.09358  | -0.00288 |
| 46  | 49753.2 | 201.0 | 0.005070111 | 0.03355 | 0.06832  | 0.16983  | -0.00612 |
| 47  | 50106.3 | 199.6 | 0.005140174 | 0.03377 | -0.02519 | 0.10128  | -0.15126 |
| 48  | 50391.3 | 198.4 | 0.013287802 | 0.08681 | 0.17616  | -0.14603 | 0.18562  |
| 49  | 51011.5 | 196.0 | 0.101036880 | 0.65206 | -0.52707 | -0.59941 | 0.12235  |
| 50  | 51376.5 | 194.6 | 0.083745740 | 0.53663 | -0.16803 | -0.71145 | -0.04722 |
| 51  | 51485.3 | 194.2 | 0.007754870 | 0.04959 | -0.04611 | -0.11531 | 0.18484  |
| 52  | 51640.5 | 193.6 | 0.075904903 | 0.48390 | -0.38317 | -0.55438 | -0.17246 |
| 53  | 51788.1 | 193.1 | 0.034395998 | 0.21865 | -0.24646 | 0.35932  | -0.16970 |
| 54  | 52033.6 | 192.2 | 0.083462667 | 0.52806 | -0.51320 | -0.21569 | -0.46708 |
| 55  | 52551.4 | 190.3 | 0.045554719 | 0.28538 | 0.51536  | -0.13220 | -0.04808 |
| 56  | 52962.9 | 188.8 | 0.027584495 | 0.17146 | 0.05442  | 0.33578  | 0.23612  |
| 57  | 53150.1 | 188.1 | 0.052457969 | 0.32492 | -0.12517 | -0.17944 | 0.52636  |
| 58  | 53436.5 | 187.1 | 0.061270057 | 0.37747 | -0.48432 | -0.37760 | -0.01805 |
| 59  | 53839.4 | 185.7 | 0.106557892 | 0.65157 | 0.39199  | 0.67578  | -0.20308 |
| 60  | 54377.7 | 183.9 | 0.099207775 | 0.60062 | -0.38145 | -0.45796 | 0.49536  |
| 61  | 54620.5 | 183.1 | 0.283178772 | 1.70679 | -0.10940 | -1.30182 | -0.00995 |
| 62  | 54952.2 | 182.0 | 0.070501873 | 0.42237 | 0.31222  | 0.37632  | -0.42809 |
| 63  | 55173.6 | 181.2 | 0.085026767 | 0.50734 | 0.12851  | 0.69616  | 0.07865  |
| 64  | 55347.8 | 180.7 | 0.013440029 | 0.07994 | 0.06187  | -0.24457 | -0.12766 |
| 65  | 55170.8 | 181.3 | 0.020535754 | 0.12254 | 0.11693  | 0.25843  | 0.20514  |
| 66  | 55783.9 | 179.3 | 0.028548264 | 0.16848 | -0.35538 | -0.20046 | 0.04470  |
| 67  | 56183.3 | 178.0 | 0.021778001 | 0.12761 | 0.15159  | 0.17228  | 0.27377  |
| 68  | 56380.2 | 177.4 | 0.042819973 | 0.25003 | -0.07313 | 0.48107  | -0.11513 |
| 69  | 56332.5 | 177.5 | 0.071829937 | 0.41978 | 0.14730  | -0.59629 | 0.20620  |
| 70  | 56432.2 | 177.2 | 0.016879889 | 0.09847 | 0.31201  | -0.03324 | -0.00436 |
| 71  | 56269.4 | 177.7 | 0.048965473 | 0.28648 | -0.05624 | 0.34102  | 0.40868  |
| 72  | 56891.9 | 175.8 | 0.044879195 | 0.25970 | -0.44773 | 0.24003  | 0.04033  |
| 73  | 57861.0 | 172.8 | 0.016200386 | 0.09218 | -0.22349 | -0.14375 | -0.14684 |
| 74  | 57796.1 | 173.0 | 0.074087714 | 0.42201 | 0.00761  | -0.64310 | -0.09150 |
| 75  | 58231.5 | 171.7 | 0.050933567 | 0.28795 | -0.43505 | 0.05037  | -0.31007 |
| 76  | 57501.5 | 173.9 | 0.017319879 | 0.09916 | -0.05030 | -0.04423 | -0.30769 |
| 77  | 58647.5 | 170.5 | 0.022399950 | 0.12574 | -0.07920 | -0.04279 | 0.34298  |
| 78  | 58176.0 | 171.9 | 0.055253027 | 0.31267 | 0.38824  | -0.22915 | 0.33080  |
| 79  | 59525.0 | 168.0 | 0.026626660 | 0.14726 | 0.16400  | 0.33727  | 0.08135  |
| 80  | 59587.3 | 167.8 | 0.062511288 | 0.34537 | -0.52894 | -0.14311 | 0.21239  |
| 81  | 59556.5 | 167.9 | 0.073673735 | 0.40725 | 0.32166  | -0.02667 | -0.55052 |
| 82  | 59657.8 | 167.6 | 0.178162526 | 0.98316 | -0.90224 | 0.11386  | -0.39516 |
| 83  | 59603.0 | 167.8 | 0.034664451 | 0.19147 | 0.09513  | 0.42696  | 0.01113  |
| 84  | 59843.9 | 167.1 | 0.066065193 | 0.36344 | -0.08862 | -0.38810 | 0.45272  |
| 85  | 60279.0 | 165.9 | 0.021552204 | 0.11771 | -0.33345 | 0.01976  | 0.07826  |
| 86  | 60389.2 | 165.6 | 0.048664961 | 0.26530 | 0.36677  | 0.16669  | 0.32093  |
| 87  | 60747.3 | 164.6 | 0.012107693 | 0.06562 | 0.20594  | -0.13275 | -0.07471 |
| 88  | 61027.3 | 163.9 | 0.018023838 | 0.09723 | -0.26066 | -0.00373 | 0.17110  |
| 89  | 60552.8 | 165.1 | 0.085637824 | 0.46559 | 0.52565  | -0.19884 | 0.38697  |
| 90  | 60561.1 | 165.1 | 0.005110542 | 0.02778 | 0.02232  | 0.09879  | -0.13238 |
| 91  | 61067.1 | 163.8 | 0.061926258 | 0.33384 | -0.18837 | -0.03145 | 0.54532  |
| 92  | 61143.9 | 163.5 | 0.001822224 | 0.00981 | 0.06995  | -0.06673 | -0.02158 |
| 93  | 60911.7 | 164.2 | 0.061371728 | 0.33170 | -0.51364 | -0.01813 | 0.25989  |
| 94  | 61423.8 | 162.8 | 0.109568412 | 0.58725 | -0.64668 | -0.40055 | -0.09283 |
| 95  | 61351.2 | 163.0 | 0.015732857 | 0.08442 | 0.24751  | 0.09322  | 0.12030  |
| 96  | 62312.6 | 160.5 | 0.029894953 | 0.15794 | -0.12775 | 0.02874  | -0.37523 |
| 97  | 62268.5 | 160.6 | 0.000625733 | 0.00331 | -0.02919 | -0.04050 | 0.02857  |
| 98  | 62459.5 | 160.1 | 0.128909551 | 0.67946 | 0.55295  | 0.33391  | -0.51207 |
| 99  | 62715.8 | 159.4 | 0.059827031 | 0.31405 | -0.18697 | -0.27320 | -0.45216 |
| 100 | 63132.0 | 158.4 | 0.055596501 | 0.28992 | 0.42386  | -0.01236 | -0.33182 |
| 101 | 63160.4 | 158.3 | 0.041493442 | 0.21628 | 0.18416  | -0.21030 | -0.37167 |
| 102 | 62986.3 | 158.8 | 0.117652650 | 0.61494 | 0.44113  | 0.16691  | 0.62648  |
| 103 | 63213.4 | 158.2 | 0.040171321 | 0.20921 | -0.27592 | 0.11523  | 0.34612  |
| 104 | 63391.2 | 157.8 | 0.076668145 | 0.39816 | -0.61118 | 0.04291  | 0.15093  |
| 105 | 63566.0 | 157.3 | 0.214771698 | 1.11232 | 0.10454  | 0.35705  | 0.98686  |
| 106 | 63870.1 | 156.6 | 0.057606061 | 0.29692 | -0.39911 | -0.28239 | 0.24061  |
| 107 | 64184.8 | 155.8 | 0.051513914 | 0.26422 | -0.09709 | -0.49353 | 0.10593  |
| 108 | 64167.0 | 155.8 | 0.042159410 | 0.21630 | 0.28257  | 0.24867  | 0.27316  |
| 109 | 64293.0 | 155.5 | 0.020964428 | 0.10735 | 0.16725  | -0.09942 | -0.26361 |
| 110 | 61977.0 | 161.4 | 0.002732734 | 0.01452 | -0.00998 | 0.09643  | 0.07153  |
| 111 | 64024.8 | 156.2 | 0.012993921 | 0.06681 | -0.12992 | -0.13823 | 0.17558  |
| 112 | 64335.8 | 155.4 | 0.106265256 | 0.54377 | 0.36181  | 0.52026  | 0.37709  |
| 113 | 63972.1 | 156.3 | 0.045338698 | 0.23332 | 0.21593  | -0.26030 | -0.34487 |
| 114 | 64617.0 | 154.8 | 0.074139903 | 0.37773 | -0.21610 | -0.42339 | -0.38958 |
| 115 | 64555.4 | 154.9 | 0.022899477 | 0.11678 | -0.16075 | -0.20545 | -0.22074 |
| 116 | 64877.8 | 154.1 | 0.068253186 | 0.34634 | 0.37383  | 0.30190  | 0.33977  |
| 117 | 64922.9 | 154.0 | 0.101742962 | 0.51592 | -0.30173 | -0.64721 | 0.07745  |
| 118 | 64472.2 | 155.1 | 0.037629271 | 0.19214 | -0.38787 | -0.01854 | -0.20337 |
| 119 | 64709.3 | 154.5 | 0.011998156 | 0.06104 | -0.24107 | -0.05331 | 0.00920  |
| 120 | 65458.3 | 152.8 | 0.001375806 | 0.00692 | 0.04622  | -0.06253 | -0.02954 |
| 121 | 65463.1 | 152.8 | 0.015297981 | 0.07693 | 0.00688  | -0.24951 | 0.12095  |
| 122 | 65377.0 | 153.0 | 0.268209821 | 1.35059 | -0.44853 | -1.06725 | -0.10191 |
| 123 | 65525.8 | 152.6 | 0.114099886 | 0.57326 | 0.17962  | -0.64969 | -0.34481 |

|     |         |       |             |         |          |          |          |
|-----|---------|-------|-------------|---------|----------|----------|----------|
| 124 | 65468.3 | 152.7 | 0.127735384 | 0.64233 | -0.51629 | -0.53968 | -0.29071 |
| 125 | 65515.4 | 152.6 | 0.005067836 | 0.02547 | 0.09303  | -0.07900 | -0.10282 |
| 126 | 66055.3 | 151.4 | 0.024868434 | 0.12394 | 0.16546  | -0.02245 | 0.30994  |
| 127 | 66319.8 | 150.8 | 0.049080781 | 0.24364 | 0.23165  | 0.17343  | 0.39987  |
| 128 | 66178.3 | 151.1 | 0.065370859 | 0.32520 | 0.49256  | 0.16239  | 0.23709  |
| 129 | 66418.7 | 150.6 | 0.017335683 | 0.08593 | 0.14866  | 0.25157  | 0.02319  |
| 130 | 66769.7 | 149.8 | 0.128179464 | 0.63200 | 0.53070  | 0.58656  | 0.07938  |
| 131 | 66922.4 | 149.4 | 0.064051695 | 0.31509 | 0.33466  | 0.25593  | 0.37094  |
| 132 | 67021.7 | 149.2 | 0.029917873 | 0.14696 | -0.03018 | -0.32131 | -0.20689 |
| 133 | 67050.4 | 149.1 | 0.141308991 | 0.69382 | -0.24569 | -0.57188 | -0.55354 |
| 134 | 66941.0 | 149.4 | 0.049815282 | 0.24499 | 0.42674  | -0.16963 | -0.18469 |
| 135 | 67304.5 | 148.6 | 0.041586190 | 0.20341 | -0.38540 | -0.23425 | 0.00213  |
| 136 | 67167.4 | 148.9 | 0.005253090 | 0.02575 | -0.06969 | -0.14418 | 0.01021  |
| 137 | 67617.1 | 147.9 | 0.034755609 | 0.16922 | 0.11844  | 0.37248  | -0.12826 |
| 138 | 67404.2 | 148.4 | 0.054099014 | 0.26423 | 0.26469  | -0.40404 | 0.17583  |
| 139 | 67344.0 | 148.5 | 0.135682561 | 0.66329 | -0.33295 | -0.71197 | -0.21337 |
| 140 | 67307.2 | 148.6 | 0.011734214 | 0.05739 | 0.10651  | -0.02038 | -0.21362 |

STATE 1: E= 0.120937 au 3.291 eV 26542.7 cm<sup>-1</sup> (376.8 nm)  
 130a -> 135a : 0.010393 (c= 0.10194374)  
 133a -> 135a : 0.086944 (c= 0.29486347)  
 134a -> 135a : 0.850713 (c= 0.92234110) HOMO -> LUMO

STATE 2: E= 0.130780 au 3.559 eV 28702.9 cm<sup>-1</sup> (348.4 nm)  
 133a -> 135a : 0.768328 (c= 0.87654322) HOMO-1 -> LUMO  
 133a -> 136a : 0.025966 (c= 0.16113930)  
 134a -> 135a : 0.059525 (c= -0.24397677)  
 134a -> 136a : 0.062740 (c= 0.25047863)

STATE 3: E= 0.143638 au 3.909 eV 31524.9 cm<sup>-1</sup> (317.2 nm)  
 130a -> 135a : 0.010311 (c= 0.10154437)  
 132a -> 135a : 0.501653 (c= -0.70827450) HOMO-2 -> LUMO  
 134a -> 136a : 0.425337 (c= 0.65217829) HOMO -> LUMO+1

STATE 4: E= 0.144634 au 3.936 eV 31743.4 cm<sup>-1</sup> (315.0 nm)  
 130a -> 135a : 0.180061 (c= -0.42433642)  
 131a -> 135a : 0.044725 (c= -0.21148200)  
 132a -> 135a : 0.309030 (c= -0.55590424) HOMO-2 -> LUMO  
 132a -> 136a : 0.049066 (c= 0.22150867)  
 133a -> 135a : 0.013261 (c= 0.11515741)  
 134a -> 136a : 0.343273 (c= -0.58589480) HOMO -> LUMO+1

STATE 5: E= 0.149215 au 4.060 eV 32748.8 cm<sup>-1</sup> (305.4 nm)  
 125a -> 135a : 0.012680 (c= -0.11260712)  
 130a -> 135a : 0.023448 (c= 0.15312873)  
 131a -> 135a : 0.809839 (c= 0.89991074) HOMO-3 -> LUMO  
 132a -> 135a : 0.052021 (c= -0.22808108)  
 133a -> 135a : 0.012492 (c= 0.11176780)  
 134a -> 136a : 0.018893 (c= -0.13745313)

STATE 6: E= 0.153049 au 4.165 eV 33590.3 cm<sup>-1</sup> (297.7 nm)  
 130a -> 135a : 0.111045 (c= 0.33323432)  
 132a -> 135a : 0.010254 (c= -0.10126363)  
 133a -> 136a : 0.691412 (c= 0.83151216) HOMO-1 -> LUMO+1  
 134a -> 136a : 0.015371 (c= -0.12397926)  
 134a -> 137a : 0.081260 (c= -0.28506145)  
 134a -> 139a : 0.013110 (c= -0.11449807)

STATE 7: E= 0.160684 au 4.372 eV 35266.1 cm<sup>-1</sup> (283.6 nm)  
 128a -> 135a : 0.013727 (c= -0.11716238)  
 128a -> 136a : 0.012593 (c= 0.11221956)  
 129a -> 135a : 0.125876 (c= -0.35479000)  
 132a -> 135a : 0.033208 (c= -0.18223146)  
 132a -> 136a : 0.704431 (c= -0.83930361) HOMO-2 -> LUMO+1  
 133a -> 137a : 0.012783 (c= 0.11306367)  
 134a -> 137a : 0.014880 (c= 0.12198534)

STATE 8: E= 0.160247 au 4.361 eV 35170.2 cm<sup>-1</sup> (284.3 nm)  
 129a -> 135a : 0.086636 (c= -0.29434035)  
 130a -> 135a : 0.486336 (c= 0.69737830) HOMO-4 -> LUMO  
 130a -> 136a : 0.017407 (c= 0.13193414)  
 131a -> 135a : 0.049636 (c= -0.22279190)  
 131a -> 136a : 0.123203 (c= 0.35100299)  
 132a -> 136a : 0.012096 (c= 0.10997994)  
 133a -> 136a : 0.036557 (c= -0.19119899)  
 133a -> 137a : 0.011026 (c= 0.10500712)  
 134a -> 135a : 0.011936 (c= -0.10925373)

134a -> 136a : 0.047196 (c= -0.21724747)  
134a -> 137a : 0.041473 (c= 0.20364959)

STATE 9: E= 0.165948 au 4.516 eV 36421.3 cm<sup>-1</sup> (274.6 nm)  
129a -> 135a : 0.244513 (c= 0.49448226) HOMO-5 → LUMO  
130a -> 136a : 0.028746 (c= 0.16954772)  
131a -> 137a : 0.014701 (c= -0.12124577)  
133a -> 137a : 0.369500 (c= 0.60786551) HOMO-1 → LUMO+2  
133a -> 138a : 0.065949 (c= 0.25680610)  
134a -> 137a : 0.199645 (c= 0.44681654)  
134a -> 138a : 0.011087 (c= 0.10529325)

STATE 10: E= 0.167926 au 4.570 eV 36855.6 cm<sup>-1</sup> (271.3 nm)  
129a -> 135a : 0.249846 (c= 0.49984647) HOMO-5 → LUMO  
131a -> 135a : 0.010008 (c= -0.10004216)  
131a -> 136a : 0.123232 (c= 0.35104461)  
132a -> 136a : 0.081343 (c= -0.28520747)  
132a -> 137a : 0.067098 (c= 0.25903240)  
133a -> 135a : 0.010105 (c= 0.10052172)  
133a -> 136a : 0.058831 (c= -0.24255128)  
134a -> 137a : 0.292155 (c= -0.54051345) HOMO → LUMO+2

## Si<sub>2</sub>Ge<sub>4</sub>{N(SiH<sub>3</sub>)CH<sub>3</sub>}<sub>4</sub>

The HOMO → LUMO transition at 425.3 nm (State 1) is very weak. The second intense absorption at 372.3 nm (State 2) is related to the HOMO-1 → LUMO transition (Figure S45). The other more stronger absorptions at 289.4 nm (State 7) is mainly related to the HOMO-5 → LUMO transition.

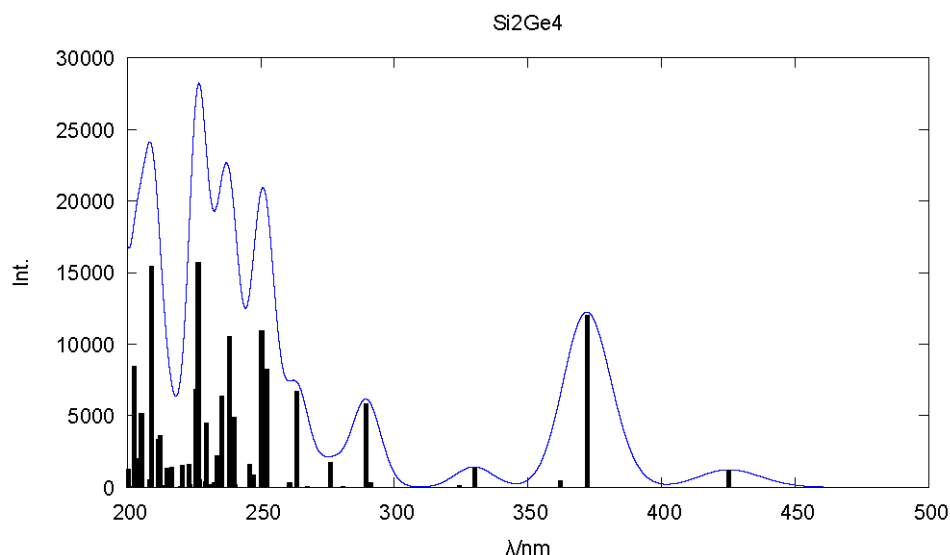

**Figure S45.** Calculated UV-Vis spectrum of Si<sub>2</sub>Ge<sub>4</sub>{N(SiH<sub>3</sub>)CH<sub>3</sub>}<sub>4</sub>.

### ABSORPTION SPECTRUM VIA TRANSITION ELECTRIC DIPOLE MOMENTS

| State | Energy (cm <sup>-1</sup> ) | Wavelength (nm) | fosc        | T2 (au**2) | TX (au)  | TY (au)  | TZ (au)  |
|-------|----------------------------|-----------------|-------------|------------|----------|----------|----------|
| 1     | 23511.1                    | 425.3           | 0.008531948 | 0.11947    | 0.00180  | -0.34503 | -0.02040 |
| 2     | 26863.5                    | 372.3           | 0.083086144 | 1.01822    | 0.01174  | -0.88935 | 0.47658  |
| 3     | 27616.5                    | 362.1           | 0.003053117 | 0.03640    | -0.19022 | -0.01123 | 0.00936  |
| 4     | 30282.6                    | 330.2           | 0.009197181 | 0.09999    | -0.00179 | 0.26965  | -0.16514 |
| 5     | 30835.7                    | 324.3           | 0.000957539 | 0.01022    | -0.10109 | 0.00217  | -0.00036 |
| 6     | 34350.3                    | 291.1           | 0.002187902 | 0.02097    | 0.02976  | 0.12817  | -0.06046 |
| 7     | 34551.8                    | 289.4           | 0.040094606 | 0.38202    | -0.01488 | 0.56218  | -0.25642 |
| 8     | 35609.8                    | 280.8           | 0.000424208 | 0.00392    | -0.06254 | -0.00061 | 0.00326  |
| 9     | 36202.0                    | 276.2           | 0.012045589 | 0.10954    | 0.00275  | 0.20357  | 0.26094  |
| 10    | 37365.3                    | 267.6           | 0.000225020 | 0.00198    | 0.04425  | 0.00249  | 0.00431  |
| 11    | 37939.8                    | 263.6           | 0.046323878 | 0.40196    | -0.00839 | -0.13948 | -0.61842 |
| 12    | 38342.5                    | 260.8           | 0.002348537 | 0.02016    | 0.14081  | 0.01385  | 0.01205  |
| 13    | 39650.5                    | 252.2           | 0.057236436 | 0.47523    | -0.01026 | 0.67672  | 0.13101  |
| 14    | 39648.5                    | 252.2           | 0.005397553 | 0.04482    | -0.21161 | -0.00255 | -0.00563 |
| 15    | 39943.0                    | 250.4           | 0.075530114 | 0.62252    | 0.00720  | 0.73601  | -0.28419 |
| 16    | 40665.7                    | 245.9           | 0.011031715 | 0.08931    | -0.29779 | 0.02510  | 0.00123  |
| 17    | 40437.8                    | 247.3           | 0.006122322 | 0.04984    | 0.00979  | -0.10736 | 0.19550  |
| 18    | 41284.1                    | 242.2           | 0.000044823 | 0.00036    | 0.01609  | 0.00744  | -0.00657 |
| 19    | 41666.0                    | 240.0           | 0.034038610 | 0.26895    | 0.00541  | -0.48049 | 0.19504  |
| 20    | 41962.8                    | 238.3           | 0.072663185 | 0.57007    | -0.01069 | 0.72030  | 0.22611  |
| 21    | 41601.1                    | 240.4           | 0.001293521 | 0.01024    | -0.09566 | -0.03161 | -0.00934 |
| 22    | 42453.1                    | 235.6           | 0.044103525 | 0.34201    | -0.58462 | -0.01246 | 0.00883  |
| 23    | 42688.2                    | 234.3           | 0.008584714 | 0.06621    | -0.02321 | 0.14268  | 0.21286  |
| 24    | 42818.1                    | 233.5           | 0.015207346 | 0.11692    | -0.34166 | -0.01007 | -0.00959 |
| 25    | 43017.0                    | 232.5           | 0.002419855 | 0.01852    | 0.01030  | -0.00722 | 0.13550  |
| 26    | 43205.5                    | 231.5           | 0.001493478 | 0.01138    | 0.10648  | 0.00549  | -0.00357 |
| 27    | 43545.1                    | 229.6           | 0.031117345 | 0.23526    | -0.00195 | -0.48469 | 0.01801  |
| 28    | 43628.5                    | 229.2           | 0.002680101 | 0.02022    | -0.13998 | 0.02307  | 0.00991  |
| 29    | 43998.6                    | 227.3           | 0.003386231 | 0.02534    | 0.15665  | 0.02500  | -0.01307 |
| 30    | 44125.1                    | 226.6           | 0.108765352 | 0.81149    | -0.02087 | 0.74111  | -0.51166 |
| 31    | 44279.0                    | 225.8           | 0.047369043 | 0.35219    | 0.01267  | -0.35685 | 0.47401  |
| 32    | 44732.0                    | 223.6           | 0.001159701 | 0.00853    | 0.00179  | -0.03894 | 0.08376  |
| 33    | 44799.8                    | 223.2           | 0.010872647 | 0.07990    | -0.28217 | -0.01162 | 0.01196  |
| 34    | 45324.5                    | 220.6           | 0.010773799 | 0.07825    | -0.27960 | 0.00876  | 0.00182  |
| 35    | 45472.5                    | 219.9           | 0.000603283 | 0.00437    | 0.02876  | 0.05023  | -0.03189 |
| 36    | 46137.1                    | 216.7           | 0.009836034 | 0.07019    | -0.08252 | 0.23918  | -0.07855 |
| 37    | 46182.9                    | 216.5           | 0.007373545 | 0.05256    | -0.11208 | -0.19179 | 0.05672  |

|     |         |       |             |         |          |          |          |
|-----|---------|-------|-------------|---------|----------|----------|----------|
| 38  | 46549.6 | 214.8 | 0.009228285 | 0.06526 | -0.00059 | 0.20499  | 0.15246  |
| 39  | 46677.9 | 214.2 | 0.000825463 | 0.00582 | -0.07568 | -0.00757 | 0.00604  |
| 40  | 47056.1 | 212.5 | 0.024973213 | 0.17472 | 0.00264  | -0.29489 | 0.29623  |
| 41  | 47136.6 | 212.1 | 0.000070390 | 0.00049 | 0.02208  | 0.00196  | -0.00038 |
| 42  | 47270.1 | 211.6 | 0.022986933 | 0.16009 | 0.39997  | 0.00184  | -0.01059 |
| 43  | 47849.5 | 209.0 | 0.106858272 | 0.73520 | 0.01552  | -0.65510 | 0.55300  |
| 44  | 47935.3 | 208.6 | 0.003565512 | 0.02449 | -0.15204 | 0.02659  | -0.02577 |
| 45  | 48664.6 | 205.5 | 0.013123514 | 0.08878 | -0.14536 | 0.23947  | -0.10150 |
| 46  | 48691.7 | 205.4 | 0.035696597 | 0.24135 | 0.48029  | 0.09080  | -0.04924 |
| 47  | 48921.6 | 204.4 | 0.005958773 | 0.04010 | 0.01206  | 0.19945  | 0.01308  |
| 48  | 49190.0 | 203.3 | 0.013941919 | 0.09331 | 0.00498  | -0.18801 | 0.24070  |
| 49  | 49656.0 | 201.4 | 0.000423710 | 0.00281 | -0.05291 | -0.00294 | 0.00113  |
| 50  | 49365.5 | 202.6 | 0.058329723 | 0.38899 | 0.00140  | 0.57877  | -0.23240 |
| 51  | 49883.1 | 200.5 | 0.008770548 | 0.05788 | 0.24008  | -0.01469 | 0.00527  |
| 52  | 50779.1 | 196.9 | 0.082182737 | 0.53281 | 0.00996  | 0.12612  | 0.71889  |
| 53  | 50680.6 | 197.3 | 0.001111360 | 0.00722 | 0.01203  | -0.02142 | -0.08134 |
| 54  | 50884.6 | 196.5 | 0.046665910 | 0.30192 | 0.00173  | 0.48350  | 0.26104  |
| 55  | 52043.8 | 192.1 | 0.370175183 | 2.34161 | 0.04407  | 1.45059  | -0.48525 |
| 56  | 52112.0 | 191.9 | 0.052843196 | 0.33383 | -0.56026 | 0.13454  | -0.04290 |
| 57  | 52648.0 | 189.9 | 0.187349595 | 1.17151 | -0.00706 | -1.05042 | 0.26092  |
| 58  | 53127.0 | 188.2 | 0.017660548 | 0.10944 | 0.32954  | -0.02870 | 0.00375  |
| 59  | 53101.6 | 188.3 | 0.036547555 | 0.22658 | 0.13560  | -0.40295 | 0.21406  |
| 60  | 53182.3 | 188.0 | 0.028925231 | 0.17905 | -0.11367 | -0.34720 | 0.21352  |
| 61  | 54435.8 | 183.7 | 0.161910173 | 0.97919 | 0.00542  | 0.85963  | -0.49009 |
| 62  | 54760.8 | 182.6 | 0.008734326 | 0.05251 | 0.01172  | -0.17755 | -0.14439 |
| 63  | 54946.5 | 182.0 | 0.026562816 | 0.15915 | -0.39872 | 0.01070  | -0.00763 |
| 64  | 55468.1 | 180.3 | 0.010270391 | 0.06096 | 0.24566  | -0.02028 | -0.01395 |
| 65  | 55598.7 | 179.9 | 0.065255889 | 0.38639 | 0.01042  | 0.52241  | 0.33672  |
| 66  | 56315.0 | 177.6 | 0.014327787 | 0.08376 | 0.00599  | 0.20128  | 0.20787  |
| 67  | 56696.0 | 176.4 | 0.001263729 | 0.00734 | -0.08537 | 0.00206  | -0.00673 |
| 68  | 56565.6 | 176.8 | 0.026538832 | 0.15446 | -0.39274 | -0.00425 | 0.01401  |
| 69  | 57054.1 | 175.3 | 0.003427885 | 0.01978 | 0.14006  | -0.01068 | 0.00703  |
| 70  | 57152.5 | 175.0 | 0.029352016 | 0.16907 | 0.00855  | -0.33664 | 0.23596  |
| 71  | 57124.1 | 175.1 | 0.011658418 | 0.06719 | 0.02131  | -0.25296 | -0.05238 |
| 72  | 57821.6 | 172.9 | 0.010232654 | 0.05826 | 0.24038  | 0.02162  | -0.00291 |
| 73  | 57929.0 | 172.6 | 0.043272208 | 0.24592 | 0.49548  | 0.00062  | 0.02042  |
| 74  | 57901.8 | 172.7 | 0.151076077 | 0.85897 | -0.00119 | -0.08521 | 0.92288  |
| 75  | 57995.7 | 172.4 | 0.218853875 | 1.24232 | 0.00715  | 1.01342  | 0.46395  |
| 76  | 58104.3 | 172.1 | 0.000453515 | 0.00257 | 0.03294  | -0.00575 | -0.03809 |
| 77  | 58404.9 | 171.2 | 0.025995050 | 0.14653 | 0.38256  | -0.00505 | -0.01234 |
| 78  | 58413.8 | 171.2 | 0.011700083 | 0.06594 | -0.00366 | -0.22728 | -0.11946 |
| 79  | 59205.5 | 168.9 | 0.318076466 | 1.76866 | 0.01408  | -1.09890 | 0.74893  |
| 80  | 59009.7 | 169.5 | 0.116018825 | 0.64726 | -0.80439 | -0.01275 | 0.00720  |
| 81  | 59293.0 | 168.7 | 0.052172984 | 0.28968 | 0.10610  | -0.34174 | 0.40204  |
| 82  | 59284.2 | 168.7 | 0.055024427 | 0.30556 | -0.54942 | -0.02809 | 0.05388  |
| 83  | 59789.5 | 167.3 | 0.078954024 | 0.43474 | 0.65921  | 0.00498  | -0.01240 |
| 84  | 59297.9 | 168.6 | 0.092355913 | 0.51274 | 0.02477  | 0.68094  | -0.22011 |
| 85  | 60127.4 | 166.3 | 0.008167762 | 0.04472 | 0.21092  | 0.00081  | 0.01528  |
| 86  | 60299.4 | 165.8 | 0.023399925 | 0.12775 | 0.21346  | 0.08530  | 0.27370  |
| 87  | 60373.5 | 165.6 | 0.025031913 | 0.13650 | 0.29050  | -0.08339 | -0.21249 |
| 88  | 61017.0 | 163.9 | 0.272439095 | 1.46992 | 0.02860  | 0.79951  | 0.91098  |
| 89  | 60964.5 | 164.0 | 0.146584014 | 0.79156 | 0.00027  | -0.49331 | 0.74041  |
| 90  | 61177.1 | 163.5 | 0.001631343 | 0.00878 | 0.02033  | 0.04955  | 0.07688  |
| 91  | 61314.8 | 163.1 | 0.024138959 | 0.12961 | 0.34376  | 0.01884  | -0.10526 |
| 92  | 60462.3 | 165.4 | 0.020671644 | 0.11256 | 0.07106  | -0.01344 | 0.32761  |
| 93  | 61292.6 | 163.2 | 0.092785321 | 0.49836 | -0.00356 | 0.69620  | 0.11686  |
| 94  | 61402.5 | 162.9 | 0.007139781 | 0.03828 | 0.06073  | 0.15374  | 0.10467  |
| 95  | 60564.6 | 165.1 | 0.077391314 | 0.42068 | -0.01090 | -0.48937 | 0.42553  |
| 96  | 61546.0 | 162.5 | 0.171502002 | 0.91737 | -0.95634 | 0.05185  | 0.01006  |
| 97  | 61924.4 | 161.5 | 0.073652192 | 0.39156 | -0.04342 | 0.48731  | -0.39013 |
| 98  | 61461.7 | 162.7 | 0.032726182 | 0.17529 | 0.41852  | 0.01045  | -0.00508 |
| 99  | 61748.4 | 161.9 | 0.028347308 | 0.15113 | 0.14892  | -0.17700 | -0.31246 |
| 100 | 62383.8 | 160.3 | 0.095712902 | 0.50510 | -0.70712 | -0.06912 | -0.01754 |
| 101 | 62760.6 | 159.3 | 0.021095981 | 0.11066 | 0.00426  | -0.09666 | 0.31827  |
| 102 | 62248.5 | 160.6 | 0.009038432 | 0.04780 | 0.00865  | 0.04281  | 0.21423  |
| 103 | 62963.4 | 158.8 | 0.114131298 | 0.59675 | -0.77188 | 0.01762  | 0.02536  |
| 104 | 63179.0 | 158.3 | 0.063517591 | 0.33098 | 0.57390  | -0.03918 | -0.00899 |
| 105 | 62075.6 | 161.1 | 0.026133847 | 0.13860 | 0.10423  | 0.14490  | 0.32671  |
| 106 | 63094.3 | 158.5 | 0.033649003 | 0.17557 | 0.02732  | 0.36885  | -0.19691 |
| 107 | 63492.9 | 157.5 | 0.031398580 | 0.16280 | -0.02007 | 0.19296  | -0.35379 |
| 108 | 60012.0 | 166.6 | 0.004893826 | 0.02685 | 0.10252  | 0.01869  | -0.12644 |
| 109 | 59813.5 | 167.2 | 0.003174203 | 0.01747 | -0.07513 | -0.00436 | -0.10866 |
| 110 | 63730.5 | 156.9 | 0.116569191 | 0.60216 | 0.77583  | -0.00895 | -0.01290 |
| 111 | 63606.5 | 157.2 | 0.029107048 | 0.15065 | -0.09587 | -0.27976 | -0.25139 |
| 112 | 63831.4 | 156.7 | 0.039502821 | 0.20374 | 0.44890  | -0.03885 | -0.02670 |
| 113 | 63600.6 | 157.2 | 0.015660106 | 0.08106 | 0.02656  | -0.05288 | -0.27849 |
| 114 | 63652.5 | 157.1 | 0.075310246 | 0.38951 | -0.62403 | 0.00319  | 0.00915  |
| 115 | 64447.6 | 155.2 | 0.009347633 | 0.04775 | 0.21828  | -0.00980 | 0.00284  |
| 116 | 64204.1 | 155.8 | 0.045885215 | 0.23528 | 0.01771  | 0.28525  | -0.39192 |
| 117 | 64671.3 | 154.6 | 0.020889525 | 0.10634 | 0.04057  | 0.06630  | -0.31670 |
| 118 | 64420.9 | 155.2 | 0.051459485 | 0.26297 | -0.51139 | 0.03114  | -0.02197 |
| 119 | 64870.2 | 154.2 | 0.042479617 | 0.21558 | 0.46380  | -0.01801 | 0.01214  |
| 120 | 65081.8 | 153.7 | 0.158721022 | 0.80288 | -0.01781 | 0.84283  | -0.30366 |
| 121 | 64770.5 | 154.4 | 0.017805441 | 0.09050 | -0.26670 | -0.13272 | 0.04192  |
| 122 | 64708.6 | 154.5 | 0.057708555 | 0.29360 | -0.54181 | 0.00601  | 0.00152  |
| 123 | 65307.5 | 153.1 | 0.029978869 | 0.15112 | 0.03999  | -0.38468 | 0.03934  |

|     |         |       |             |         |          |          |          |
|-----|---------|-------|-------------|---------|----------|----------|----------|
| 124 | 65125.6 | 153.5 | 0.003843985 | 0.01943 | 0.09723  | 0.04328  | -0.09003 |
| 125 | 65311.5 | 153.1 | 0.005069636 | 0.02555 | -0.02110 | 0.03308  | -0.15497 |
| 126 | 64308.0 | 155.5 | 0.010545418 | 0.05399 | 0.23196  | -0.00339 | 0.01289  |
| 127 | 65391.8 | 152.9 | 0.007951920 | 0.04003 | 0.20008  | -0.00150 | -0.00066 |
| 128 | 65531.4 | 152.6 | 0.014316404 | 0.07192 | -0.26780 | -0.01039 | 0.00997  |
| 129 | 65546.1 | 152.6 | 0.022817218 | 0.11460 | -0.33840 | -0.00547 | 0.00749  |
| 130 | 66070.2 | 151.4 | 0.086514922 | 0.43108 | -0.00904 | 0.40576  | -0.51610 |
| 131 | 66233.4 | 151.0 | 0.172366584 | 0.85674 | 0.01935  | -0.82525 | 0.41874  |
| 132 | 65792.7 | 152.0 | 0.022375649 | 0.11196 | 0.33431  | 0.01124  | -0.00861 |
| 133 | 66160.4 | 151.1 | 0.058774990 | 0.29246 | 0.54067  | -0.00521 | -0.01059 |
| 134 | 66425.1 | 150.5 | 0.000971654 | 0.00482 | -0.06891 | -0.00373 | 0.00731  |
| 135 | 66279.0 | 150.9 | 0.085333223 | 0.42386 | -0.01439 | 0.37722  | -0.53043 |
| 136 | 65845.2 | 151.9 | 0.003666831 | 0.01833 | -0.13127 | 0.00403  | -0.03294 |
| 137 | 65523.5 | 152.6 | 0.011913484 | 0.05986 | -0.01724 | 0.00816  | 0.24391  |
| 138 | 66792.7 | 149.7 | 0.000250451 | 0.00123 | 0.01717  | 0.01237  | -0.02805 |
| 139 | 66989.8 | 149.3 | 0.058030841 | 0.28518 | 0.53360  | -0.01515 | 0.01497  |
| 140 | 67317.6 | 148.5 | 0.176796651 | 0.86461 | -0.00887 | 0.31683  | -0.87416 |

STATE 1: E= 0.107124 au 2.915 eV 23511.1 cm<sup>-1</sup> (425.3 nm)

142a -> 144a : 0.135745 (c= 0.36843524)  
 143a -> 144a : 0.828242 (c= 0.91007819) HOMO -> LUMO

STATE 2: E= 0.122399 au 3.331 eV 26863.5 cm<sup>-1</sup> (372.3 nm)

138a -> 144a : 0.031265 (c= -0.17681858)  
 140a -> 144a : 0.014743 (c= -0.12142052)  
 141a -> 145a : 0.014862 (c= -0.12191103)  
 141a -> 147a : 0.010651 (c= -0.10320446)  
 142a -> 144a : 0.752713 (c= -0.86759061) HOMO-1 -> LUMO  
 143a -> 144a : 0.110063 (c= 0.33175707)  
 143a -> 149a : 0.013224 (c= -0.11499372)

STATE 3: E= 0.125830 au 3.424 eV 27616.5 cm<sup>-1</sup> (362.1 nm)

135a -> 144a : 0.015254 (c= -0.12350845)  
 139a -> 144a : 0.020531 (c= 0.14328718)  
 141a -> 144a : 0.924946 (c= 0.96174091) HOMO-2 -> LUMO

STATE 4: E= 0.137978 au 3.755 eV 30282.6 cm<sup>-1</sup> (330.2 nm)

134a -> 144a : 0.015912 (c= -0.12614142)  
 140a -> 144a : 0.930437 (c= -0.96459167) HOMO-3 -> LUMO  
 143a -> 146a : 0.013650 (c= -0.11683277)

STATE 5: E= 0.140498 au 3.823 eV 30835.7 cm<sup>-1</sup> (324.3 nm)

139a -> 144a : 0.855613 (c= -0.92499326) HOMO-4 -> LUMO  
 141a -> 144a : 0.027067 (c= 0.16452165)  
 143a -> 145a : 0.087887 (c= -0.29645783)

STATE 6: E= 0.156512 au 4.259 eV 34350.3 cm<sup>-1</sup> (291.1 nm)

138a -> 144a : 0.045788 (c= -0.21398211)  
 139a -> 144a : 0.092209 (c= 0.30365940)  
 142a -> 145a : 0.105477 (c= -0.32477210)  
 143a -> 145a : 0.690373 (c= -0.83088717) HOMO -> LUMO+1

STATE 7: E= 0.157430 au 4.284 eV 34551.8 cm<sup>-1</sup> (289.4 nm)

136a -> 144a : 0.014443 (c= 0.12017844)  
 138a -> 144a : 0.702349 (c= -0.83806254) HOMO-5 -> LUMO  
 141a -> 145a : 0.134467 (c= 0.36669759)  
 143a -> 145a : 0.043211 (c= 0.20787231)  
 143a -> 146a : 0.030438 (c= -0.17446473)

STATE 8: E= 0.162250 au 4.415 eV 35609.8 cm<sup>-1</sup> (280.8 nm)

140a -> 145a : 0.014727 (c= -0.12135359)  
 142a -> 145a : 0.704701 (c= -0.83946449) HOMO-1 -> LUMO+1  
 143a -> 145a : 0.089745 (c= 0.29957534)  
 143a -> 147a : 0.111598 (c= 0.33406233)

STATE 9: E= 0.164948 au 4.488 eV 36202.0 cm<sup>-1</sup> (276.2 nm)

140a -> 146a : 0.020646 (c= 0.14368767)  
 141a -> 145a : 0.041925 (c= 0.20475717)  
 142a -> 146a : 0.376144 (c= 0.61330569) HOMO-1 -> LUMO+2  
 142a -> 149a : 0.011602 (c= 0.10771110)  
 143a -> 146a : 0.500311 (c= 0.70732672) HOMO -> LUMO+2

STATE 10: E= 0.170249 au 4.633 eV 37365.3 cm<sup>-1</sup> (267.6 nm)

142a -> 145a : 0.045981 (c= -0.21443147)  
 142a -> 147a : 0.060131 (c= 0.24521557)  
 142a -> 148a : 0.055929 (c= -0.23649304)  
 143a -> 145a : 0.047162 (c= 0.21716784)  
 143a -> 147a : 0.463631 (c= -0.68090436) HOMO -> LUMO+3  
 143a -> 148a : 0.258898 (c= 0.50882058) HOMO -> LUMO+4

## 8.2 TDDFT calculation for $\text{Si}_6\{\text{N}(\text{SiH}_3)\text{CH}_3\}_4$ and $\text{Ge}_6\{\text{N}(\text{SiH}_3)\text{CH}_3\}_4$

### General procedure

We have performed a TDDFT calculation with ORCA on the optimized structures of  $\text{Si}_6\{\text{N}(\text{SiH}_3)\text{CH}_3\}_4$  and  $\text{Ge}_6\{\text{N}(\text{SiH}_3)\text{CH}_3\}_4$  using the CAM-B3LYP functional, a double zeta basis set (def2-SVP) and the CPCM implicit solvent model for hexane solving for 140 excited states.

### $\text{Si}_6\{\text{N}(\text{SiH}_3)\text{CH}_3\}_4$

The HOMO  $\rightarrow$  LUMO transition at 371.6 nm (State 1) is very weak (Figure S46).

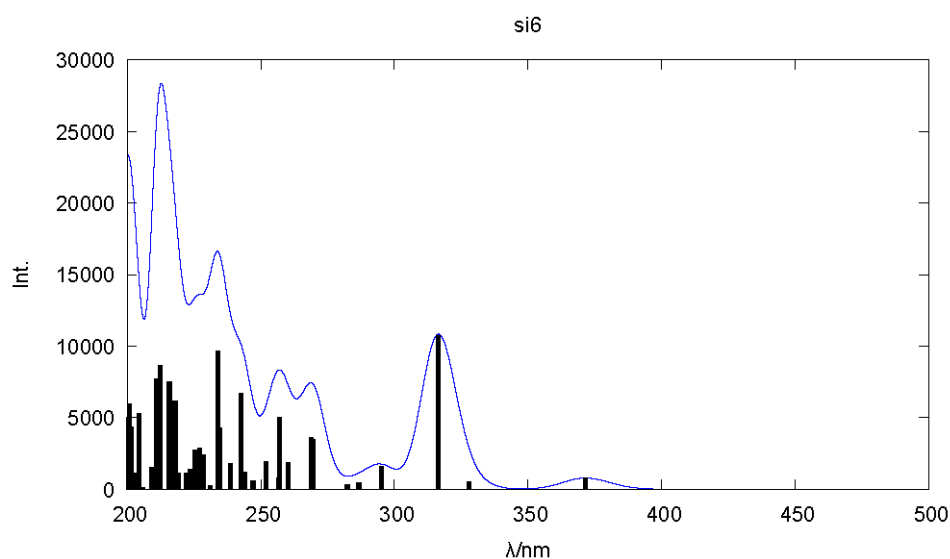

**Figure S46.** Calculated UV-Vis spectrum of  $\text{Si}_6\{\text{N}(\text{SiH}_3)\text{CH}_3\}_4$ .

#### ABSORPTION SPECTRUM VIA TRANSITION ELECTRIC DIPOLE MOMENTS

| State | Energy (cm <sup>-1</sup> ) | Wavelength (nm) | fosc        | T2 (au**2) | TX (au)  | TY (au)  | TZ (au)  |
|-------|----------------------------|-----------------|-------------|------------|----------|----------|----------|
| 1     | 26907.7                    | 371.6           | 0.005447872 | 0.06665    | 0.14006  | -0.20815 | -0.06094 |
| 2     | 30494.7                    | 327.9           | 0.003810617 | 0.04114    | -0.08378 | 0.01863  | -0.18377 |
| 3     | 31598.8                    | 316.5           | 0.074052135 | 0.77151    | 0.63537  | -0.60644 | 0.00681  |
| 4     | 33862.7                    | 295.3           | 0.011067183 | 0.10759    | -0.15829 | 0.25019  | 0.14121  |
| 5     | 34869.5                    | 286.8           | 0.003117998 | 0.02944    | 0.11347  | 0.12650  | 0.02367  |
| 6     | 35406.2                    | 282.4           | 0.002249189 | 0.02091    | 0.11435  | -0.07444 | 0.04791  |
| 7     | 37067.6                    | 269.8           | 0.024280798 | 0.21565    | 0.18783  | -0.25905 | -0.33654 |
| 8     | 37182.6                    | 268.9           | 0.024798102 | 0.21956    | 0.20025  | -0.42077 | 0.04913  |
| 9     | 38431.3                    | 260.2           | 0.012785502 | 0.10952    | -0.06848 | -0.32355 | 0.01213  |
| 10    | 38928.5                    | 256.9           | 0.005417557 | 0.04582    | 0.02898  | 0.07683  | 0.19767  |
| 11    | 38925.5                    | 256.9           | 0.034790241 | 0.29424    | -0.09458 | -0.52727 | -0.08535 |
| 12    | 39669.3                    | 252.1           | 0.013214157 | 0.10966    | 0.01777  | 0.32364  | -0.06784 |
| 13    | 40470.2                    | 247.1           | 0.004143902 | 0.03371    | -0.08963 | 0.05873  | -0.14908 |
| 14    | 40976.2                    | 244.0           | 0.008154400 | 0.06551    | -0.21491 | 0.12895  | -0.05199 |
| 15    | 41201.5                    | 242.7           | 0.046255307 | 0.36959    | 0.02090  | -0.55608 | 0.24482  |
| 16    | 41895.9                    | 238.7           | 0.012607541 | 0.09907    | -0.08987 | 0.28971  | 0.08403  |
| 17    | 42608.2                    | 234.7           | 0.029888466 | 0.23093    | 0.29116  | 0.30422  | 0.23154  |
| 18    | 42764.0                    | 233.8           | 0.066806220 | 0.51430    | 0.50682  | -0.47893 | -0.16751 |
| 19    | 43275.6                    | 231.1           | 0.001794351 | 0.01365    | -0.02549 | -0.05028 | -0.10233 |
| 20    | 43747.5                    | 228.6           | 0.016692392 | 0.12561    | 0.03682  | 0.31169  | -0.16464 |
| 21    | 44002.0                    | 227.3           | 0.020130203 | 0.15061    | -0.22974 | 0.29990  | -0.08884 |
| 22    | 44196.2                    | 226.3           | 0.016305329 | 0.12146    | -0.07173 | -0.09333 | -0.32803 |
| 23    | 44355.3                    | 225.5           | 0.019006438 | 0.14107    | 0.31929  | 0.10953  | -0.16470 |
| 24    | 44698.1                    | 223.7           | 0.009559994 | 0.07041    | 0.14192  | -0.22126 | -0.03628 |
| 25    | 44938.7                    | 222.5           | 0.006747575 | 0.04943    | 0.11650  | -0.00640 | -0.18926 |
| 26    | 45029.2                    | 222.1           | 0.007699532 | 0.05629    | 0.06652  | -0.16483 | 0.15716  |
| 27    | 45025.2                    | 222.1           | 0.007433550 | 0.05435    | 0.07580  | -0.11135 | 0.19028  |



|     |         |       |             |         |          |          |          |
|-----|---------|-------|-------------|---------|----------|----------|----------|
| 28  | 45597.5 | 219.3 | 0.007843098 | 0.05663 | -0.20126 | -0.10255 | -0.07488 |
| 29  | 45881.4 | 218.0 | 0.042744198 | 0.30670 | -0.52238 | 0.18375  | -0.00768 |
| 30  | 46012.2 | 217.3 | 0.018267584 | 0.13070 | 0.24932  | 0.08339  | 0.24817  |
| 31  | 46340.2 | 215.8 | 0.051734807 | 0.36754 | -0.26270 | 0.54168  | 0.07147  |
| 32  | 47118.3 | 212.2 | 0.059874089 | 0.41834 | -0.07949 | 0.63525  | 0.09202  |
| 33  | 47180.1 | 212.0 | 0.029710823 | 0.20732 | -0.04294 | -0.29439 | 0.34468  |
| 34  | 47150.8 | 212.1 | 0.014225062 | 0.09932 | -0.29755 | 0.08239  | -0.06323 |
| 35  | 47401.7 | 211.0 | 0.053408644 | 0.37093 | 0.33583  | -0.49355 | -0.12064 |
| 36  | 47821.5 | 209.1 | 0.010566786 | 0.07274 | 0.15482  | -0.18345 | 0.12298  |
| 37  | 48559.4 | 205.9 | 0.000845227 | 0.00573 | 0.01099  | 0.05458  | -0.05129 |
| 38  | 48880.0 | 204.6 | 0.036635172 | 0.24674 | -0.16065 | 0.42155  | 0.20791  |
| 39  | 49086.6 | 203.7 | 0.000388313 | 0.00260 | -0.04786 | -0.01751 | 0.00272  |
| 40  | 49276.1 | 202.9 | 0.008014843 | 0.05355 | 0.19469  | -0.12421 | 0.01467  |
| 41  | 49016.4 | 204.0 | 0.003384247 | 0.02273 | -0.08120 | 0.12596  | 0.01645  |
| 42  | 49647.0 | 201.4 | 0.029934783 | 0.19850 | 0.07288  | -0.43511 | 0.06217  |
| 43  | 49763.2 | 201.0 | 0.041405231 | 0.27392 | 0.25879  | -0.41795 | -0.17964 |
| 44  | 49893.8 | 200.4 | 0.034629883 | 0.22850 | 0.31829  | -0.35629 | 0.01560  |
| 45  | 50428.8 | 198.3 | 0.012428404 | 0.08114 | -0.26355 | 0.10013  | -0.04062 |
| 46  | 50334.0 | 198.7 | 0.024151949 | 0.15797 | 0.15993  | 0.36259  | -0.03036 |
| 47  | 50730.9 | 197.1 | 0.007129529 | 0.04627 | -0.10703 | 0.17504  | 0.06459  |
| 48  | 51033.4 | 195.9 | 0.030918010 | 0.19945 | 0.33824  | -0.13531 | -0.25833 |
| 49  | 51462.0 | 194.3 | 0.067191233 | 0.42984 | -0.54570 | 0.27030  | 0.24285  |
| 50  | 51642.3 | 193.6 | 0.041769474 | 0.26627 | -0.00301 | 0.20069  | -0.47538 |
| 51  | 52071.3 | 192.0 | 0.023995836 | 0.15171 | 0.29546  | 0.20803  | -0.14537 |
| 52  | 52634.9 | 190.0 | 0.032678660 | 0.20439 | -0.18719 | 0.40791  | 0.05441  |
| 53  | 52774.8 | 189.5 | 0.041348464 | 0.25793 | 0.27003  | 0.25567  | 0.34591  |
| 54  | 53345.4 | 187.5 | 0.022572262 | 0.13930 | -0.32404 | 0.18341  | 0.02563  |
| 55  | 53898.5 | 185.5 | 0.075598578 | 0.46176 | -0.55943 | 0.35100  | -0.15998 |
| 56  | 53941.2 | 185.4 | 0.097475871 | 0.59491 | 0.45883  | -0.61077 | 0.10651  |
| 57  | 53749.1 | 186.0 | 0.033803940 | 0.20705 | -0.43665 | 0.07398  | 0.10445  |
| 58  | 54218.4 | 184.4 | 0.008822523 | 0.05357 | 0.03511  | 0.13111  | -0.18748 |
| 59  | 55184.9 | 181.2 | 0.153888864 | 0.91804 | -0.63651 | 0.62615  | -0.34761 |
| 60  | 55760.4 | 179.3 | 0.251972235 | 1.48766 | 0.74369  | -0.93864 | -0.23136 |
| 61  | 55916.9 | 178.8 | 0.020063053 | 0.11812 | -0.05034 | -0.32060 | 0.11314  |
| 62  | 56390.6 | 177.3 | 0.032025343 | 0.18697 | 0.16459  | 0.09894  | 0.38741  |
| 63  | 56791.8 | 176.1 | 0.027147456 | 0.15737 | -0.28154 | -0.16441 | -0.22599 |
| 64  | 56684.9 | 176.4 | 0.017330179 | 0.10065 | -0.23215 | 0.18454  | 0.11270  |
| 65  | 57184.8 | 174.9 | 0.009668077 | 0.05566 | -0.13254 | 0.17026  | -0.09542 |
| 66  | 57512.1 | 173.9 | 0.039709736 | 0.22731 | 0.14129  | 0.44974  | 0.07129  |
| 67  | 57256.4 | 174.7 | 0.022693064 | 0.13048 | -0.09004 | -0.34907 | 0.02284  |
| 68  | 58104.8 | 172.1 | 0.000638109 | 0.00362 | -0.00581 | -0.04373 | 0.04085  |
| 69  | 58462.8 | 171.0 | 0.070791096 | 0.39863 | -0.13662 | -0.61640 | 0.00479  |
| 70  | 58855.6 | 169.9 | 0.014217947 | 0.07953 | 0.14083  | 0.21678  | 0.11271  |
| 71  | 58973.4 | 169.6 | 0.022603599 | 0.12618 | -0.14611 | -0.18820 | -0.26347 |
| 72  | 59022.0 | 169.4 | 0.023586759 | 0.13156 | -0.21500 | 0.25518  | -0.14219 |
| 73  | 58809.9 | 170.0 | 0.115948186 | 0.64907 | 0.21064  | 0.69393  | -0.35093 |
| 74  | 59227.1 | 168.8 | 0.129461908 | 0.71961 | 0.80398  | -0.26284 | 0.06440  |
| 75  | 59948.5 | 166.8 | 0.071749434 | 0.39402 | -0.26401 | 0.15223  | -0.54877 |
| 76  | 59840.0 | 167.1 | 0.103426109 | 0.56900 | 0.68173  | -0.28785 | -0.14627 |
| 77  | 60160.9 | 166.2 | 0.196948097 | 1.07774 | -0.46406 | 0.39339  | 0.84121  |
| 78  | 60250.2 | 166.0 | 0.002383946 | 0.01303 | 0.03129  | 0.09599  | 0.05323  |
| 79  | 60724.8 | 164.7 | 0.234987834 | 1.27396 | 0.05845  | 0.07209  | 1.12487  |
| 80  | 60932.6 | 164.1 | 0.117212497 | 0.63329 | -0.55935 | -0.35754 | 0.43884  |
| 81  | 61076.3 | 163.7 | 0.013839167 | 0.07460 | -0.06214 | 0.13253  | -0.23059 |
| 82  | 61198.5 | 163.4 | 0.005660125 | 0.03045 | -0.03164 | -0.07739 | 0.15316  |
| 83  | 60681.0 | 164.8 | 0.008608545 | 0.04670 | -0.08367 | -0.15340 | 0.12717  |
| 84  | 60680.7 | 164.8 | 0.101376338 | 0.55000 | 0.46893  | 0.33190  | 0.46898  |
| 85  | 61481.7 | 162.6 | 0.050007529 | 0.26777 | -0.49473 | -0.06623 | 0.13648  |
| 86  | 62025.4 | 161.2 | 0.048116548 | 0.25539 | 0.02816  | -0.03420 | -0.50341 |
| 87  | 62077.8 | 161.1 | 0.047245941 | 0.25056 | 0.03671  | -0.41699 | 0.27445  |
| 88  | 61888.4 | 161.6 | 0.003858112 | 0.02052 | 0.13664  | -0.00823 | -0.04224 |
| 89  | 62473.6 | 160.1 | 0.055838750 | 0.29425 | 0.30289  | 0.19004  | -0.40791 |
| 90  | 62387.8 | 160.3 | 0.003317971 | 0.01751 | -0.07316 | 0.02767  | -0.10672 |
| 91  | 62375.7 | 160.3 | 0.121705229 | 0.64235 | 0.74765  | -0.28027 | -0.06943 |
| 92  | 63029.9 | 158.7 | 0.064250972 | 0.33559 | 0.04936  | 0.45988  | 0.34880  |
| 93  | 62888.8 | 159.0 | 0.054456818 | 0.28507 | -0.10299 | 0.01297  | -0.52373 |
| 94  | 63160.3 | 158.3 | 0.032000633 | 0.16680 | 0.06673  | 0.13348  | 0.38017  |
| 95  | 63254.6 | 158.1 | 0.052007195 | 0.27067 | 0.02475  | 0.40220  | -0.32909 |
| 96  | 63569.3 | 157.3 | 0.076535452 | 0.39636 | 0.29786  | -0.24512 | -0.49755 |
| 97  | 63131.5 | 158.4 | 0.085151207 | 0.44404 | 0.17901  | 0.22707  | 0.60036  |
| 98  | 63455.9 | 157.6 | 0.019015360 | 0.09865 | 0.05855  | -0.30440 | -0.05068 |
| 99  | 63446.6 | 157.6 | 0.017041306 | 0.08842 | 0.14184  | -0.25382 | -0.06230 |
| 100 | 64042.5 | 156.1 | 0.053930078 | 0.27723 | 0.15590  | -0.41505 | -0.28400 |
| 101 | 64183.9 | 155.8 | 0.041511148 | 0.21292 | -0.29738 | -0.14095 | 0.32344  |
| 102 | 63023.1 | 158.7 | 0.018548266 | 0.09689 | 0.17173  | -0.15923 | 0.20505  |
| 103 | 63468.7 | 157.6 | 0.018849336 | 0.09777 | -0.21018 | 0.10021  | -0.20870 |
| 104 | 63785.6 | 156.8 | 0.075100367 | 0.38761 | -0.18267 | 0.59346  | -0.04531 |
| 105 | 64269.9 | 155.6 | 0.019646755 | 0.10064 | -0.25266 | 0.17796  | -0.07160 |
| 106 | 64860.3 | 154.2 | 0.065637861 | 0.33316 | -0.24663 | 0.44957  | 0.26498  |
| 107 | 64535.2 | 155.0 | 0.125753451 | 0.64150 | 0.48887  | -0.32030 | 0.54764  |
| 108 | 65108.4 | 153.6 | 0.079118670 | 0.40005 | 0.25414  | 0.08724  | -0.57259 |
| 109 | 64421.8 | 155.2 | 0.012690191 | 0.06485 | -0.08863 | 0.09693  | 0.21817  |
| 110 | 64660.6 | 154.7 | 0.042935490 | 0.21860 | 0.43482  | 0.08191  | 0.15108  |
| 111 | 65352.1 | 153.0 | 0.055026428 | 0.27720 | 0.03572  | 0.52203  | -0.05833 |
| 112 | 65196.5 | 153.4 | 0.038234690 | 0.19307 | -0.36048 | 0.19469  | 0.15879  |
| 113 | 65841.4 | 151.9 | 0.009482051 | 0.04741 | 0.10444  | 0.15571  | 0.11072  |

|     |         |       |             |         |          |          |          |
|-----|---------|-------|-------------|---------|----------|----------|----------|
| 114 | 65403.1 | 152.9 | 0.081654315 | 0.41101 | -0.43825 | -0.24049 | -0.40139 |
| 115 | 65723.3 | 152.2 | 0.107798830 | 0.53997 | -0.24589 | 0.65867  | -0.21369 |
| 116 | 64962.9 | 153.9 | 0.022473731 | 0.11389 | 0.02544  | 0.24339  | 0.23239  |
| 117 | 66142.5 | 151.2 | 0.017325041 | 0.08623 | -0.27320 | 0.00412  | -0.10761 |
| 118 | 66079.1 | 151.3 | 0.010676681 | 0.05319 | -0.22319 | -0.02645 | 0.05177  |
| 119 | 65954.3 | 151.6 | 0.037254604 | 0.18596 | 0.37368  | -0.15061 | -0.15374 |
| 120 | 66068.7 | 151.4 | 0.016777965 | 0.08360 | -0.19966 | 0.05376  | 0.20210  |
| 121 | 66218.7 | 151.0 | 0.003818081 | 0.01898 | -0.09865 | 0.09275  | 0.02545  |
| 122 | 66618.6 | 150.1 | 0.090269152 | 0.44609 | -0.17590 | 0.61402  | 0.19527  |
| 123 | 66450.3 | 150.5 | 0.013508036 | 0.06692 | -0.20479 | -0.05470 | -0.14829 |
| 124 | 66588.6 | 150.2 | 0.025225299 | 0.12471 | -0.02411 | 0.33619  | 0.10539  |
| 125 | 66673.7 | 150.0 | 0.012768090 | 0.06304 | 0.12150  | -0.21753 | 0.03106  |
| 126 | 66897.1 | 149.5 | 0.018349494 | 0.09030 | -0.02635 | 0.24614  | 0.17036  |
| 127 | 67196.1 | 148.8 | 0.054860724 | 0.26878 | -0.39257 | 0.24080  | 0.23808  |
| 128 | 67323.9 | 148.5 | 0.191993811 | 0.93884 | -0.48552 | 0.83171  | 0.10661  |
| 129 | 66789.5 | 149.7 | 0.088731141 | 0.43736 | -0.60330 | 0.26961  | 0.02642  |
| 130 | 67174.8 | 148.9 | 0.002406527 | 0.01179 | -0.06801 | 0.07260  | 0.04357  |
| 131 | 67188.8 | 148.8 | 0.030182566 | 0.14789 | 0.24265  | 0.24580  | 0.16910  |
| 132 | 67330.5 | 148.5 | 0.086766510 | 0.42424 | -0.54279 | 0.15655  | 0.32422  |
| 133 | 67074.1 | 149.1 | 0.009419930 | 0.04623 | -0.11808 | -0.07170 | -0.16478 |
| 134 | 67603.9 | 147.9 | 0.019840187 | 0.09662 | 0.15687  | -0.26817 | 0.00948  |
| 135 | 67589.4 | 148.0 | 0.042988846 | 0.20939 | -0.34813 | 0.23713  | 0.17878  |
| 136 | 63968.9 | 156.3 | 0.014790179 | 0.07612 | -0.14156 | 0.01921  | -0.23603 |
| 137 | 66977.8 | 149.3 | 0.034288051 | 0.16853 | -0.00931 | -0.15931 | 0.37824  |
| 138 | 68227.3 | 146.6 | 0.007980439 | 0.03851 | 0.18283  | 0.06464  | 0.03004  |
| 139 | 67883.5 | 147.3 | 0.030532187 | 0.14807 | 0.05633  | -0.13986 | 0.35403  |
| 140 | 68441.2 | 146.1 | 0.008941444 | 0.04301 | 0.01783  | -0.13156 | 0.15932  |

STATE 1: E= 0.122600 au 3.336 eV 26907.7 cm<sup>-1</sup> (371.6 nm)  
 106a -> 108a : 0.045875 (c= 0.21418410)  
 107a -> 108a : 0.915884 (c= 0.95701848) HOMO → LUMO

STATE 2: E= 0.138944 au 3.781 eV 30494.7 cm<sup>-1</sup> (327.9 nm)  
 105a -> 108a : 0.919024 (c= -0.95865743) HOMO-2 → LUMO  
 106a -> 108a : 0.034858 (c= 0.18670239)  
 107a -> 109a : 0.010404 (c= 0.10199965)

STATE 3: E= 0.143975 au 3.918 eV 31598.8 cm<sup>-1</sup> (316.5 nm)  
 104a -> 108a : 0.022106 (c= -0.14867958)  
 105a -> 108a : 0.026788 (c= -0.16367101)  
 106a -> 108a : 0.779541 (c= -0.88291594) HOMO-1 → LUMO  
 107a -> 108a : 0.033939 (c= 0.18422416)  
 107a -> 109a : 0.024762 (c= 0.15736054)  
 107a -> 112a : 0.011753 (c= -0.10840914)

STATE 4: E= 0.154290 au 4.198 eV 33862.7 cm<sup>-1</sup> (295.3 nm)  
 99a -> 108a : 0.022423 (c= -0.14974468)  
 102a -> 108a : 0.110996 (c= -0.33316055)  
 104a -> 108a : 0.789544 (c= -0.88856309) HOMO-3 → LUMO

STATE 5: E= 0.158877 au 4.323 eV 34869.5 cm<sup>-1</sup> (286.8 nm)  
 98a -> 108a : 0.010743 (c= -0.10364800)  
 103a -> 108a : 0.884303 (c= -0.94037383) HOMO-4 → LUMO  
 106a -> 111a : 0.017589 (c= 0.13262310)

STATE 6: E= 0.161322 au 4.390 eV 35406.2 cm<sup>-1</sup> (282.4 nm)  
 98a -> 108a : 0.011397 (c= -0.10675482)  
 102a -> 108a : 0.585360 (c= -0.76508854) HOMO-5 → LUMO  
 104a -> 108a : 0.057038 (c= 0.23882564)  
 107a -> 109a : 0.212694 (c= 0.46118769) HOMO → LUMO+1  
 107a -> 110a : 0.063519 (c= 0.25203021)

# Ge<sub>6</sub>{N(SiH<sub>3</sub>)CH<sub>3</sub>}<sub>4</sub>

The HOMO → LUMO transition at 459.5 nm (State 1) is very weak (Figure S47).

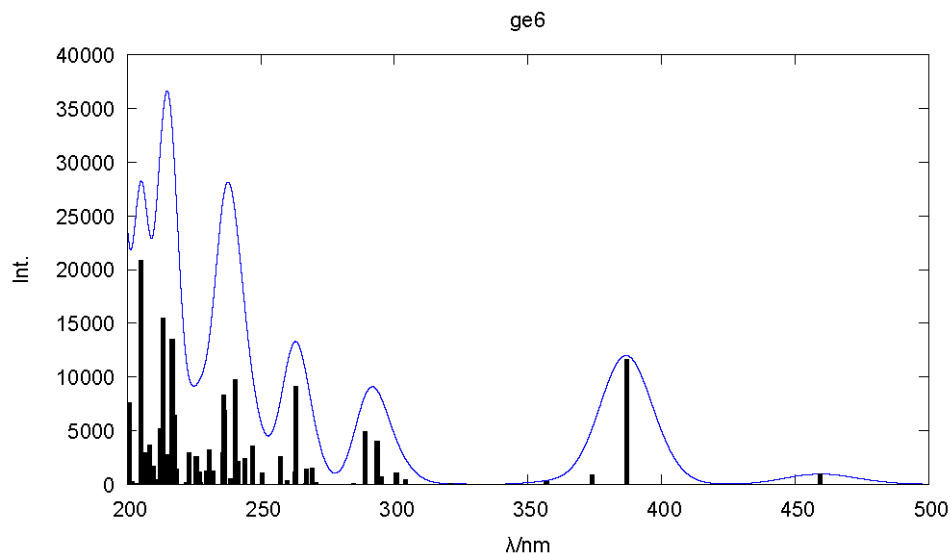

**Figure S47.** Calculated UV-Vis spectrum of Ge<sub>6</sub>{N(SiH<sub>3</sub>)CH<sub>3</sub>}<sub>4</sub>.

## ABSORPTION SPECTRUM VIA TRANSITION ELECTRIC DIPOLE MOMENTS

| State | Energy (cm <sup>-1</sup> ) | Wavelength (nm) | fosc        | T2 (au**2) | TX (au)  | TY (au)  | TZ (au)  |
|-------|----------------------------|-----------------|-------------|------------|----------|----------|----------|
| 1     | 21762.9                    | 459.5           | 0.006617624 | 0.10011    | -0.00079 | 0.30306  | 0.09089  |
| 2     | 25829.5                    | 387.2           | 0.080515447 | 1.02622    | -0.00780 | 0.85971  | -0.53578 |
| 3     | 26721.5                    | 374.2           | 0.006244041 | 0.07693    | -0.27730 | 0.00519  | 0.00196  |
| 4     | 28016.4                    | 356.9           | 0.001441505 | 0.01694    | -0.00254 | -0.08999 | 0.09399  |
| 5     | 31143.1                    | 321.1           | 0.000312751 | 0.00331    | 0.05671  | 0.00944  | 0.00082  |
| 6     | 33245.4                    | 300.8           | 0.007561514 | 0.07488    | -0.05080 | 0.22092  | 0.15327  |
| 7     | 32872.2                    | 304.2           | 0.002802945 | 0.02807    | 0.14303  | 0.06751  | 0.05528  |
| 8     | 33877.8                    | 295.2           | 0.004746599 | 0.04613    | 0.05522  | -0.16094 | -0.13106 |
| 9     | 34060.9                    | 293.6           | 0.027956558 | 0.27021    | -0.02662 | -0.40099 | -0.32971 |
| 10    | 34581.6                    | 289.2           | 0.033735699 | 0.32116    | 0.00710  | -0.49126 | 0.28245  |
| 11    | 35103.7                    | 284.9           | 0.000328392 | 0.00308    | -0.05259 | -0.01517 | -0.00916 |
| 12    | 36933.0                    | 270.8           | 0.001057113 | 0.00942    | 0.09108  | -0.03074 | 0.01348  |
| 13    | 37124.1                    | 269.4           | 0.010538814 | 0.09346    | -0.01422 | 0.04329  | -0.30229 |
| 14    | 37430.1                    | 267.2           | 0.009848195 | 0.08662    | 0.01618  | 0.04410  | -0.29054 |
| 15    | 37484.8                    | 266.8           | 0.000596676 | 0.00524    | 0.01867  | -0.01213 | 0.06888  |
| 16    | 38013.3                    | 263.1           | 0.063187452 | 0.54723    | 0.03464  | 0.69491  | -0.25126 |
| 17    | 38043.0                    | 262.9           | 0.007906284 | 0.06842    | -0.15319 | 0.19736  | -0.07746 |
| 18    | 38469.2                    | 259.9           | 0.002582456 | 0.02210    | -0.14821 | -0.00866 | -0.00775 |
| 19    | 38840.8                    | 257.5           | 0.017733959 | 0.15031    | 0.00079  | 0.34987  | -0.16705 |
| 20    | 39897.4                    | 250.6           | 0.007536904 | 0.06219    | -0.24903 | 0.01240  | 0.00464  |
| 21    | 40498.6                    | 246.9           | 0.024979846 | 0.20306    | 0.00124  | -0.44939 | 0.03333  |
| 22    | 40950.8                    | 244.2           | 0.016826790 | 0.13527    | 0.36718  | -0.01644 | -0.01354 |
| 23    | 41388.1                    | 241.6           | 0.014782592 | 0.11758    | 0.04788  | 0.28568  | -0.18352 |
| 24    | 41437.7                    | 241.3           | 0.006733051 | 0.05349    | -0.11526 | 0.08185  | -0.18305 |
| 25    | 41450.9                    | 241.2           | 0.006082193 | 0.04831    | 0.04961  | 0.13669  | -0.16481 |
| 26    | 41596.3                    | 240.4           | 0.067167046 | 0.53159    | 0.02094  | -0.72754 | -0.04284 |
| 27    | 41876.1                    | 238.8           | 0.003448824 | 0.02711    | 0.16376  | 0.01218  | -0.01219 |
| 28    | 42367.7                    | 236.0           | 0.057606951 | 0.44763    | 0.32473  | -0.55609 | 0.18150  |
| 29    | 42320.3                    | 236.3           | 0.047642430 | 0.37061    | 0.37368  | 0.45904  | -0.14234 |
| 30    | 42427.6                    | 235.7           | 0.020282489 | 0.15738    | 0.39654  | 0.00549  | -0.01040 |
| 31    | 43046.2                    | 232.3           | 0.008353521 | 0.06389    | 0.25156  | 0.01835  | -0.01632 |
| 32    | 43347.5                    | 230.7           | 0.022030683 | 0.16732    | 0.00592  | -0.40058 | 0.08258  |
| 33    | 43561.0                    | 229.6           | 0.008864801 | 0.06700    | 0.00348  | 0.18776  | -0.17813 |
| 34    | 43956.5                    | 227.5           | 0.001404619 | 0.01052    | -0.01103 | 0.00847  | 0.10162  |
| 35    | 44029.7                    | 227.1           | 0.007853244 | 0.05872    | 0.02007  | 0.01535  | 0.24100  |
| 36    | 44275.1                    | 225.9           | 0.017732675 | 0.13185    | 0.03480  | 0.32880  | 0.15011  |
| 37    | 44002.1                    | 227.3           | 0.003625431 | 0.02712    | -0.12219 | 0.10450  | 0.03570  |
| 38    | 44777.2                    | 223.3           | 0.020085362 | 0.14767    | -0.38373 | -0.00603 | 0.01966  |
| 39    | 45023.5                    | 222.1           | 0.001335349 | 0.00976    | 0.00229  | -0.09431 | -0.02941 |
| 40    | 45749.0                    | 218.6           | 0.010022028 | 0.07212    | -0.25989 | -0.06171 | 0.02776  |
| 41    | 45903.4                    | 217.8           | 0.044360422 | 0.31815    | 0.04304  | -0.47548 | 0.30035  |

|     |         |       |             |         |          |          |          |
|-----|---------|-------|-------------|---------|----------|----------|----------|
| 42  | 46117.0 | 216.8 | 0.093196882 | 0.66530 | -0.01471 | -0.49771 | 0.64604  |
| 43  | 46541.1 | 214.9 | 0.019321781 | 0.13667 | 0.36628  | -0.04990 | -0.00464 |
| 44  | 46850.0 | 213.4 | 0.107246896 | 0.75362 | 0.00123  | -0.86679 | 0.04791  |
| 45  | 47071.4 | 212.4 | 0.035935750 | 0.25133 | 0.49670  | 0.06749  | 0.00801  |
| 46  | 47480.8 | 210.6 | 0.003252943 | 0.02255 | -0.12811 | 0.07237  | 0.03009  |
| 47  | 47622.4 | 210.0 | 0.011804581 | 0.08160 | -0.00269 | -0.25994 | -0.11844 |
| 48  | 48010.4 | 208.3 | 0.025136748 | 0.17237 | 0.00084  | 0.37452  | 0.17915  |
| 49  | 48332.2 | 206.9 | 0.020187832 | 0.13751 | 0.36964  | -0.02944 | -0.00311 |
| 50  | 48769.0 | 205.0 | 0.144402884 | 0.97478 | 0.01828  | -0.72275 | 0.67237  |
| 51  | 49205.1 | 203.2 | 0.000252948 | 0.00169 | 0.00091  | 0.02201  | -0.03475 |
| 52  | 49550.5 | 201.8 | 0.001763406 | 0.01172 | 0.10283  | -0.02186 | 0.02577  |
| 53  | 49787.5 | 200.9 | 0.052722580 | 0.34862 | 0.00082  | -0.58518 | -0.07864 |
| 54  | 50063.2 | 199.7 | 0.005095403 | 0.03351 | 0.00032  | -0.00072 | -0.18305 |
| 55  | 50905.8 | 196.4 | 0.098866326 | 0.63938 | 0.03373  | 0.64171  | -0.47587 |
| 56  | 51076.6 | 195.8 | 0.129243558 | 0.83303 | 0.00444  | -0.38958 | 0.82537  |
| 57  | 50762.0 | 197.0 | 0.039822741 | 0.25827 | -0.17449 | 0.25178  | -0.40549 |
| 58  | 51361.2 | 194.7 | 0.029483509 | 0.18898 | -0.42350 | -0.02348 | 0.09530  |
| 59  | 51473.8 | 194.3 | 0.003552852 | 0.02272 | -0.14922 | 0.01932  | 0.00910  |
| 60  | 52209.6 | 191.5 | 0.052491538 | 0.33099 | -0.02686 | 0.53826  | 0.20135  |
| 61  | 52355.2 | 191.0 | 0.012740372 | 0.08011 | -0.08414 | 0.27008  | 0.00930  |
| 62  | 52417.7 | 190.8 | 0.262780599 | 1.65041 | 0.05185  | 1.28304  | -0.03909 |
| 63  | 52659.6 | 189.9 | 0.026256475 | 0.16415 | 0.40430  | 0.00176  | -0.02620 |
| 64  | 53103.1 | 188.3 | 0.152861557 | 0.94766 | 0.02344  | -0.86113 | 0.45340  |
| 65  | 53473.8 | 187.0 | 0.081907125 | 0.50426 | 0.70991  | -0.01124 | -0.01259 |
| 66  | 54006.2 | 185.2 | 0.151445739 | 0.92319 | 0.01827  | -0.16925 | 0.94563  |
| 67  | 54272.4 | 184.3 | 0.010346626 | 0.06276 | -0.25051 | 0.00015  | 0.00262  |
| 68  | 55126.7 | 181.4 | 0.090168218 | 0.53848 | -0.01485 | -0.61394 | 0.40167  |
| 69  | 55316.5 | 180.8 | 0.023491414 | 0.13981 | 0.37215  | -0.01623 | 0.03235  |
| 70  | 55573.6 | 179.9 | 0.029728684 | 0.17611 | -0.01617 | 0.37234  | 0.19291  |
| 71  | 55815.3 | 179.2 | 0.034534404 | 0.20369 | -0.45126 | -0.00618 | 0.00425  |
| 72  | 55503.2 | 180.2 | 0.059362679 | 0.35210 | 0.58909  | -0.05776 | -0.04172 |
| 73  | 56049.4 | 178.4 | 0.026443462 | 0.15532 | -0.11341 | -0.36457 | -0.09769 |
| 74  | 56563.6 | 176.8 | 0.054793074 | 0.31891 | 0.56398  | -0.02809 | 0.00648  |
| 75  | 56474.9 | 177.1 | 0.034277182 | 0.19981 | -0.43000 | 0.10025  | -0.06974 |
| 76  | 56403.5 | 177.3 | 0.145856621 | 0.85133 | -0.04406 | -0.73540 | 0.55549  |
| 77  | 57015.7 | 175.4 | 0.047178342 | 0.27241 | 0.52032  | 0.03077  | -0.02709 |
| 78  | 57448.0 | 174.1 | 0.008947431 | 0.05127 | 0.22639  | -0.00135 | -0.00435 |
| 79  | 57313.7 | 174.5 | 0.033796961 | 0.19413 | -0.02299 | 0.40439  | -0.17342 |
| 80  | 57699.4 | 173.3 | 0.001842809 | 0.01051 | 0.10170  | -0.00701 | 0.01110  |
| 81  | 57772.6 | 173.1 | 0.041589733 | 0.23700 | 0.03192  | -0.36811 | -0.31697 |
| 82  | 57937.7 | 172.6 | 0.045425565 | 0.25812 | -0.10055 | -0.22904 | -0.44221 |
| 83  | 58390.9 | 171.3 | 0.117575975 | 0.66290 | 0.81330  | -0.02414 | -0.02938 |
| 84  | 58851.3 | 169.9 | 0.010769501 | 0.06024 | -0.23860 | -0.05756 | -0.00006 |
| 85  | 58612.5 | 170.6 | 0.160855425 | 0.90349 | 0.01934  | 0.84917  | -0.42663 |
| 86  | 59009.8 | 169.5 | 0.030919083 | 0.17250 | 0.38731  | 0.01337  | 0.14937  |
| 87  | 59145.6 | 169.1 | 0.019839701 | 0.11043 | -0.25535 | -0.09986 | 0.18776  |
| 88  | 58868.4 | 169.9 | 0.151050306 | 0.84472 | -0.04391 | 0.91606  | -0.06031 |
| 89  | 59404.2 | 168.3 | 0.059217768 | 0.32818 | -0.57189 | 0.00804  | -0.03255 |
| 90  | 59786.9 | 167.3 | 0.037025976 | 0.20388 | -0.02129 | 0.11513  | 0.43609  |
| 91  | 59823.4 | 167.2 | 0.308190762 | 1.69599 | 0.00115  | 0.20803  | 1.28558  |
| 92  | 59915.1 | 166.9 | 0.004114287 | 0.02261 | -0.11824 | -0.01260 | -0.09202 |
| 93  | 60131.4 | 166.3 | 0.139813305 | 0.76546 | -0.01210 | -0.85930 | -0.16408 |
| 94  | 60291.7 | 165.9 | 0.036650260 | 0.20012 | 0.03134  | 0.13804  | 0.42436  |
| 95  | 60412.5 | 165.5 | 0.014068994 | 0.07667 | 0.27686  | 0.00384  | 0.00042  |
| 96  | 60835.2 | 164.4 | 0.101113567 | 0.54718 | -0.73891 | 0.03274  | 0.01101  |
| 97  | 60857.7 | 164.3 | 0.218195798 | 1.18034 | -0.13864 | -0.98002 | 0.44797  |
| 98  | 60505.0 | 165.3 | 0.090188635 | 0.49072 | -0.67138 | 0.18637  | -0.07239 |
| 99  | 61101.5 | 163.7 | 0.127632611 | 0.68768 | 0.01580  | -0.06495 | -0.82657 |
| 100 | 61376.6 | 162.9 | 0.000183457 | 0.00098 | -0.00047 | -0.02983 | 0.00969  |
| 101 | 61470.1 | 162.7 | 0.065940578 | 0.35315 | -0.05963 | -0.33791 | -0.48520 |
| 102 | 60854.9 | 164.3 | 0.009371149 | 0.05070 | 0.00168  | -0.05085 | -0.21933 |
| 103 | 60332.8 | 165.7 | 0.150269186 | 0.81996 | 0.90306  | -0.03223 | -0.05840 |
| 104 | 61564.2 | 162.4 | 0.004229257 | 0.02262 | -0.14121 | 0.05113  | 0.00775  |
| 105 | 61802.4 | 161.8 | 0.200364795 | 1.06731 | -0.05054 | 0.24400  | -1.00261 |
| 106 | 61827.4 | 161.7 | 0.015716827 | 0.08369 | 0.05394  | 0.07576  | -0.27393 |
| 107 | 62244.4 | 160.7 | 0.018893674 | 0.09993 | 0.29751  | -0.06314 | 0.08619  |
| 108 | 57606.9 | 173.6 | 0.004935454 | 0.02821 | -0.05814 | 0.15718  | -0.01093 |
| 109 | 57614.0 | 173.6 | 0.005527350 | 0.03158 | -0.05833 | -0.16752 | 0.01089  |
| 110 | 62485.0 | 160.0 | 0.067085992 | 0.35345 | 0.08824  | -0.50338 | 0.30377  |
| 111 | 62535.0 | 159.9 | 0.032401447 | 0.17058 | -0.39506 | -0.09987 | 0.06728  |
| 112 | 62901.6 | 159.0 | 0.114016007 | 0.59673 | -0.77218 | 0.00927  | 0.01955  |
| 113 | 58882.4 | 169.8 | 0.003567291 | 0.01994 | 0.14115  | 0.00394  | -0.00237 |
| 114 | 62704.5 | 159.5 | 0.028403447 | 0.14912 | -0.08490 | -0.31460 | -0.20722 |
| 115 | 63224.2 | 158.2 | 0.048793400 | 0.25407 | 0.50371  | -0.00019 | -0.01869 |
| 116 | 63582.6 | 157.3 | 0.075439435 | 0.39060 | -0.62198 | 0.03730  | 0.04854  |
| 117 | 63427.7 | 157.7 | 0.024405798 | 0.12667 | 0.08750  | 0.33213  | 0.09332  |
| 118 | 63689.0 | 157.0 | 0.143390899 | 0.74120 | -0.02086 | 0.63830  | -0.57735 |
| 119 | 63657.2 | 157.1 | 0.014785891 | 0.07647 | 0.00228  | -0.22354 | 0.16276  |
| 120 | 63249.0 | 158.1 | 0.004392924 | 0.02287 | 0.07648  | 0.11519  | -0.06122 |
| 121 | 64194.1 | 155.8 | 0.068412461 | 0.35085 | -0.59169 | 0.02724  | 0.00076  |
| 122 | 63780.2 | 156.8 | 0.014179157 | 0.07319 | -0.20223 | -0.08897 | -0.15613 |
| 123 | 63838.3 | 156.6 | 0.041821081 | 0.21567 | 0.38522  | -0.16266 | -0.20204 |
| 124 | 63913.9 | 156.5 | 0.047636224 | 0.24537 | -0.47352 | -0.07059 | -0.12712 |
| 125 | 64611.6 | 154.8 | 0.121129986 | 0.61719 | -0.01827 | 0.61384  | -0.48996 |
| 126 | 64726.2 | 154.5 | 0.230535968 | 1.17256 | -1.08183 | -0.01690 | 0.04374  |
| 127 | 64864.4 | 154.2 | 0.137075005 | 0.69571 | -0.83404 | 0.00442  | 0.00764  |

|     |         |       |             |         |          |          |          |
|-----|---------|-------|-------------|---------|----------|----------|----------|
| 128 | 64944.3 | 154.0 | 0.002390300 | 0.01212 | -0.10548 | -0.02786 | 0.01463  |
| 129 | 65090.7 | 153.6 | 0.010997513 | 0.05562 | 0.02867  | -0.16668 | 0.16437  |
| 130 | 64756.1 | 154.4 | 0.062345477 | 0.31696 | 0.21879  | -0.40184 | 0.32804  |
| 131 | 64951.8 | 154.0 | 0.116357067 | 0.58976 | 0.68257  | 0.21360  | -0.27971 |
| 132 | 65124.3 | 153.6 | 0.128972023 | 0.65197 | -0.19563 | 0.43576  | -0.65101 |
| 133 | 65467.6 | 152.7 | 0.010090345 | 0.05074 | 0.21331  | -0.00792 | -0.07196 |
| 134 | 65063.9 | 153.7 | 0.031569403 | 0.15974 | -0.07910 | -0.28157 | -0.27239 |
| 135 | 65482.3 | 152.7 | 0.053977461 | 0.27137 | 0.52078  | -0.00694 | -0.01064 |
| 136 | 65785.2 | 152.0 | 0.036952097 | 0.18492 | 0.42861  | -0.02113 | -0.02767 |
| 137 | 62387.1 | 160.3 | 0.009281442 | 0.04898 | 0.01657  | 0.20794  | -0.07391 |
| 138 | 65879.5 | 151.8 | 0.048177419 | 0.24075 | 0.04469  | 0.48465  | -0.06221 |
| 139 | 66043.2 | 151.4 | 0.019710163 | 0.09825 | 0.31031  | 0.00154  | -0.04424 |
| 140 | 66339.1 | 150.7 | 0.286295864 | 1.42076 | 0.02737  | -1.00117 | 0.64628  |

STATE 1: E= 0.099159 au 2.698 eV 21762.9 cm<sup>\*\*</sup>-1 (459.5 nm)  
 160a -> 162a : 0.036528 (c= -0.19112200)  
 161a -> 162a : 0.924559 (c= 0.96153995) HOMO → LUMO

STATE 2: E= 0.117688 au 3.202 eV 25829.5 cm<sup>\*\*</sup>-1 (387.2 nm)  
 156a -> 162a : 0.027011 (c= 0.16434937)  
 160a -> 162a : 0.843677 (c= 0.91851911) HOMO-1 → LUMO  
 161a -> 162a : 0.029603 (c= 0.17205590)

STATE 3: E= 0.121752 au 3.313 eV 26721.5 cm<sup>\*\*</sup>-1 (374.2 nm)  
 153a -> 162a : 0.020918 (c= 0.14463192)  
 157a -> 162a : 0.016725 (c= -0.12932542)  
 159a -> 162a : 0.916136 (c= -0.95714997) HOMO-2 → LUMO

STATE 4: E= 0.127652 au 3.474 eV 28016.4 cm<sup>\*\*</sup>-1 (356.9 nm)  
 152a -> 162a : 0.014845 (c= 0.12183910)  
 158a -> 162a : 0.945043 (c= 0.97213313) HOMO-3 → LUMO

STATE 5: E= 0.141898 au 3.861 eV 31143.1 cm<sup>\*\*</sup>-1 (321.1 nm)  
 157a -> 162a : 0.298341 (c= -0.54620632) HOMO-4 → LUMO  
 159a -> 162a : 0.023801 (c= 0.15427587)  
 160a -> 163a : 0.016972 (c= 0.13027624)  
 160a -> 164a : 0.011827 (c= -0.10875084)  
 161a -> 163a : 0.373904 (c= -0.61147698) HOMO → LUMO+1  
 161a -> 164a : 0.248784 (c= 0.49878252) HOMO → LUMO+2

STATE 6: E= 0.151477 au 4.122 eV 33245.4 cm<sup>\*\*</sup>-1 (300.8 nm)  
 156a -> 162a : 0.098452 (c= 0.31377104)  
 157a -> 162a : 0.072855 (c= 0.26991597)  
 160a -> 163a : 0.025326 (c= 0.15914059)  
 160a -> 166a : 0.017634 (c= -0.13279215)  
 161a -> 163a : 0.426535 (c= -0.65309684) HOMO → LUMO+1  
 161a -> 164a : 0.286875 (c= -0.53560753) HOMO → LUMO+2

## 9. Cartesian Coordinates of all calculated structures

### 9.1 Cartesian Coordinates of mixed silicon germanium clusters with {N(SiMe<sub>3</sub>)Dipp}<sub>4</sub> substituent

#### (1) Si<sub>4</sub>Ge<sub>2</sub>{N(SiMe<sub>3</sub>)Dipp}<sub>4</sub>

178

Energy = -9040.341433711 Hartree

|    |            |            |            |
|----|------------|------------|------------|
| Si | 1.1072150  | 0.8011386  | -1.0163449 |
| Ge | 0.9098950  | -1.7532666 | -0.1607459 |
| Si | 1.1847097  | 0.1264255  | 1.3007505  |
| Si | 3.1087979  | -4.0011801 | -0.8914795 |
| Si | 3.0652353  | -0.3349820 | 3.7347656  |
| N  | 1.7640674  | -2.9559961 | -1.3324429 |
| N  | 2.4584954  | 0.6311426  | 2.3778087  |
| C  | 1.0419426  | -3.1322459 | -2.5643187 |
| C  | -0.0524191 | -4.0292754 | -2.6226271 |
| C  | -0.7099893 | -4.2067765 | -3.8440183 |
| H  | -1.5479048 | -4.8974523 | -3.8979069 |
| C  | -0.3175284 | -3.5132586 | -4.9830290 |
| H  | -0.8381454 | -3.6671101 | -5.9242641 |
| C  | 0.7298834  | -2.6010496 | -4.9036708 |
| H  | 1.0147445  | -2.0366526 | -5.7872450 |
| C  | 1.4144666  | -2.3792307 | -3.7048420 |
| C  | -0.5490611 | -4.7926593 | -1.4040531 |
| H  | 0.0395043  | -4.4634437 | -0.5416768 |
| C  | -0.3465961 | -6.3109757 | -1.5576536 |
| H  | 0.7054881  | -6.5640050 | -1.7176277 |
| H  | -0.6928082 | -6.8331549 | -0.6582513 |
| H  | -0.9168573 | -6.6935803 | -2.4116091 |
| C  | -2.0250092 | -4.4842276 | -1.1042665 |
| H  | -2.1806800 | -3.4102131 | -0.9619984 |
| H  | -2.6738430 | -4.8144218 | -1.9232728 |
| H  | -2.3431589 | -4.9948636 | -0.1905420 |
| C  | 2.5249490  | -1.3405814 | -3.6591007 |
| H  | 2.7194957  | -1.1225761 | -2.6033169 |
| C  | 3.8290876  | -1.8682853 | -4.2848664 |
| H  | 4.6092968  | -1.0995705 | -4.2392220 |
| H  | 4.1963947  | -2.7577080 | -3.7666056 |
| H  | 3.6721101  | -2.1324096 | -5.3370664 |
| C  | 2.1150291  | -0.0263396 | -4.3428489 |
| H  | 2.8797867  | 0.7385411  | -4.1699413 |
| H  | 2.0088096  | -0.1519352 | -5.4266177 |
| H  | 1.1693265  | 0.3525662  | -3.9477476 |
| C  | 2.6997370  | -4.9731767 | 0.6682808  |
| H  | 3.5703632  | -5.5491577 | 1.0062492  |
| H  | 2.4045370  | -4.3141276 | 1.4913700  |
| H  | 1.8776949  | -5.6763356 | 0.4958784  |
| C  | 3.4359775  | -5.2080737 | -2.2924283 |
| H  | 4.2796256  | -5.8579387 | -2.0274751 |
| H  | 2.5678630  | -5.8462565 | -2.4836744 |
| H  | 3.6807545  | -4.7039115 | -3.2315387 |
| C  | 4.6210038  | -2.9368063 | -0.5625395 |
| H  | 5.4623728  | -3.5358780 | -0.1936791 |
| H  | 4.9435862  | -2.4158978 | -1.4698796 |
| H  | 4.3967429  | -2.1782178 | 0.1941966  |
| C  | 3.0814146  | 1.9117279  | 2.0980534  |
| C  | 2.5808699  | 3.0723292  | 2.7281455  |
| C  | 3.2532501  | 4.2836896  | 2.5394027  |
| H  | 2.8803521  | 5.1791907  | 3.0305323  |
| C  | 4.3833539  | 4.3611349  | 1.7325696  |
| H  | 4.8982786  | 5.3086333  | 1.6003356  |
| C  | 4.8333770  | 3.2221851  | 1.0738262  |
| H  | 5.6994571  | 3.2888131  | 0.4207393  |

|    |            |            |            |
|----|------------|------------|------------|
| C  | 4.1945754  | 1.9873223  | 1.2316018  |
| C  | 1.3187942  | 3.0455225  | 3.5731549  |
| H  | 0.9774067  | 2.0067096  | 3.6094184  |
| C  | 0.2103743  | 3.8793842  | 2.9096887  |
| H  | -0.7200539 | 3.8105906  | 3.4840177  |
| H  | 0.4941089  | 4.9355607  | 2.8441662  |
| H  | 0.0146454  | 3.5197017  | 1.8939474  |
| C  | 1.5595288  | 3.5177660  | 5.0162541  |
| H  | 0.6324685  | 3.4496271  | 5.5965546  |
| H  | 2.3197961  | 2.9089391  | 5.5144905  |
| H  | 1.8955193  | 4.5602409  | 5.0394051  |
| C  | 4.7262022  | 0.7776626  | 0.4798493  |
| H  | 4.0072000  | -0.0364458 | 0.6210562  |
| C  | 6.0883917  | 0.3236734  | 1.0358352  |
| H  | 6.4440958  | -0.5611524 | 0.4970489  |
| H  | 6.8340057  | 1.1180425  | 0.9174529  |
| H  | 6.0292527  | 0.0768710  | 2.0995027  |
| C  | 4.8401086  | 1.0476399  | -1.0300596 |
| H  | 5.1575571  | 0.1372445  | -1.5491475 |
| H  | 3.8783378  | 1.3619628  | -1.4467204 |
| H  | 5.5794239  | 1.8285749  | -1.2396494 |
| C  | 4.4020271  | 0.6442273  | 4.6137807  |
| H  | 4.8228344  | 0.0389362  | 5.4264946  |
| H  | 5.2200511  | 0.9278752  | 3.9450580  |
| H  | 4.0051678  | 1.5653492  | 5.0516589  |
| C  | 3.7384034  | -1.9677728 | 3.0987119  |
| H  | 3.9904723  | -2.6380449 | 3.9296703  |
| H  | 2.9867313  | -2.4718059 | 2.4814651  |
| H  | 4.6364806  | -1.8363240 | 2.4877541  |
| C  | 1.6645734  | -0.7123619 | 4.9247688  |
| H  | 1.9939340  | -1.4221806 | 5.6936989  |
| H  | 1.3058078  | 0.1900132  | 5.4295178  |
| H  | 0.8143548  | -1.1616834 | 4.4012141  |
| Si | -1.1171442 | -0.8026940 | -1.0055541 |
| Ge | -0.9118769 | 1.7523723  | -0.1535198 |
| Si | -1.1736496 | -0.1263022 | 1.3116648  |
| N  | -1.7758989 | 2.9549119  | -1.3181985 |
| N  | -2.4383424 | -0.6298490 | 2.4000383  |
| Si | -3.1169527 | 4.0001070  | -0.8663117 |
| C  | -1.0642663 | 3.1309532  | -2.5561717 |
| Si | -3.0344358 | 0.3381884  | 3.7602853  |
| C  | -3.0633075 | -1.9108020 | 2.1264982  |
| C  | -2.6946889 | 4.9723065  | 0.6897861  |
| C  | -3.4557419 | 5.2065880  | -2.2648213 |
| C  | -4.6264446 | 2.9358502  | -0.5247149 |
| C  | 0.0291429  | 4.0284562  | -2.6241555 |
| C  | -1.4467806 | 2.3780524  | -3.6934308 |
| C  | -4.3637910 | -0.6400397 | 4.6516169  |
| C  | -3.7132112 | 1.9697641  | 3.1270571  |
| C  | -1.6242353 | 0.7180017  | 4.9381681  |
| C  | -2.5572034 | -3.0708485 | 2.7531937  |
| C  | -4.1831809 | -1.9874600 | 1.2687989  |
| H  | -3.5629980 | 5.5464718  | 1.0366656  |
| H  | -2.3900492 | 4.3134091  | 1.5095473  |
| H  | -1.8757071 | 5.6771101  | 0.5095805  |
| H  | -4.2980057 | 5.8556805  | -1.9936613 |
| H  | -2.5896919 | 5.8455857  | -2.4626493 |
| H  | -3.7070469 | 4.7020083  | -3.2019866 |
| H  | -5.4645351 | 3.5349478  | -0.1484969 |
| H  | -4.9568616 | 2.4152671  | -1.4294245 |
| H  | -4.3958614 | 2.1769966  | 0.2298529  |
| C  | 0.6749259  | 4.2072225  | -3.8516359 |
| C  | 0.5378115  | 4.7901573  | -1.4094958 |
| C  | -0.7735861 | 2.6008686  | -4.8985062 |
| C  | -2.5563346 | 1.3388976  | -3.6378120 |
| H  | -4.7773360 | -0.0340586 | 5.4675378  |
| H  | -5.1877485 | -0.9238505 | 3.9902491  |
| H  | -3.9634492 | -1.5610043 | 5.0866227  |
| H  | -3.9597724 | 2.6409597  | 3.9589265  |

|   |            |            |            |
|---|------------|------------|------------|
| H | -2.9662056 | 2.4734501  | 2.5038773  |
| H | -4.6154836 | 1.8370548  | 2.5226047  |
| H | -1.9471817 | 1.4298753  | 5.7079075  |
| H | -1.2616541 | -0.1831960 | 5.4422752  |
| H | -0.7781215 | 1.1657546  | 4.4066381  |
| C | -3.2303271 | -4.2826841 | 2.5702138  |
| C | -1.2881545 | -3.0432578 | 3.5876919  |
| C | -4.8225897 | -3.2227252 | 1.1167292  |
| C | -4.7211807 | -0.7785222 | 0.5204442  |
| H | 1.5115343  | 4.8988383  | -3.9131342 |
| C | 0.2722142  | 3.5140569  | -4.9872891 |
| H | -0.0425507 | 4.4601075  | -0.5418947 |
| C | 0.3344154  | 6.3087290  | -1.5592905 |
| C | 2.0164740  | 4.4808746  | -1.1243393 |
| H | -1.0661094 | 2.0364542  | -5.7795676 |
| H | -2.7412007 | 1.1206677  | -2.5803364 |
| C | -3.8663520 | 1.8660522  | -4.2516719 |
| C | -2.1518874 | 0.0249399  | -4.3253548 |
| H | -2.8528912 | -5.1778174 | 3.0585350  |
| C | -4.3666829 | -4.3611423 | 1.7723316  |
| H | -0.9468911 | -2.0043044 | 3.6208819  |
| C | -0.1849570 | -3.8769141 | 2.9153082  |
| C | -1.5167099 | -3.5153016 | 5.0328479  |
| H | -5.6940177 | -3.2900585 | 0.4708795  |
| H | -4.0014063 | 0.0359532  | 0.6554869  |
| C | -6.0790888 | -0.3248063 | 1.0870674  |
| C | -4.8470751 | -1.0493940 | -0.9883452 |
| H | 0.7837930  | 3.6688288  | -5.9333161 |
| H | -0.7190560 | 6.5622923  | -1.7089931 |
| H | 0.6892934  | 6.8296604  | -0.6625457 |
| H | 0.8967030  | 6.6922245  | -2.4181167 |
| H | 2.1731548  | 3.4066406  | -0.9848534 |
| H | 2.6575020  | 4.8117961  | -1.9491754 |
| H | 2.3436294  | 4.9903282  | -0.2131393 |
| H | -4.6457955 | 1.0970191  | -4.1989107 |
| H | -4.2292921 | 2.7553468  | -3.7300852 |
| H | -3.7190838 | 2.1302501  | -5.3052497 |
| H | -2.9145512 | -0.7404423 | -4.1455165 |
| H | -2.0556268 | 0.1506642  | -5.4100407 |
| H | -1.2023822 | -0.3533950 | -3.9389206 |
| H | -4.8821002 | -5.3089900 | 1.6445900  |
| H | 0.7501986  | -3.8075808 | 3.4818248  |
| H | -0.4688496 | -4.9332115 | 2.8525085  |
| H | 0.0021811  | -3.5175053 | 1.8978468  |
| H | -0.5848622 | -3.4468031 | 5.6053899  |
| H | -2.2729675 | -2.9066192 | 5.5373300  |
| H | -1.8521826 | -4.5578709 | 5.0589897  |
| H | -6.4394774 | 0.5595776  | 0.5506837  |
| H | -6.8252593 | -1.1195780 | 0.9750634  |
| H | -6.0115592 | -0.0774652 | 2.1501128  |
| H | -5.1692645 | -0.1394695 | -1.5053228 |
| H | -3.8884822 | -1.3633151 | -1.4125724 |
| H | -5.5875567 | -1.8308925 | -1.1916029 |

## (2) Si<sub>4</sub>Ge<sub>2</sub>{N(SiMe<sub>3</sub>)Dipp}<sub>4</sub>

178

Energy = -9040.336121606 Hartree

|    |            |            |            |
|----|------------|------------|------------|
| Si | 1.1135076  | 0.8024089  | -1.0454615 |
| Si | 0.8794049  | -1.6965375 | -0.3203277 |
| Ge | 1.2587923  | 0.0146867  | 1.3106785  |
| Si | 3.0417126  | -3.8989236 | -0.8555187 |
| Si | 3.2091319  | -0.3656646 | 3.8002416  |
| N  | 1.6905413  | -2.8536304 | -1.3346664 |
| N  | 2.6788693  | 0.5734380  | 2.4137168  |
| C  | 1.0256641  | -3.0756342 | -2.6071730 |
| C  | -0.0585732 | -3.9810545 | -2.6775062 |
| C  | -0.6509436 | -4.2124403 | -3.9231771 |



|   |            |            |            |
|---|------------|------------|------------|
| H | -1.4815549 | -4.9102447 | -3.9915135 |
| C | -0.2038559 | -3.5620866 | -5.0679018 |
| H | -0.6750817 | -3.7578505 | -6.0271496 |
| C | 0.8331682  | -2.6401638 | -4.9735324 |
| H | 1.1607157  | -2.1097408 | -5.8634655 |
| C | 1.4563282  | -2.3666086 | -3.7513318 |
| C | -0.6157635 | -4.6939711 | -1.4537244 |
| H | -0.0956521 | -4.3044100 | -0.5724524 |
| C | -0.3695971 | -6.2124673 | -1.5144292 |
| H | 0.6957678  | -6.4483207 | -1.5896582 |
| H | -0.7658634 | -6.6965054 | -0.6145826 |
| H | -0.8721420 | -6.6506423 | -2.3840621 |
| C | -2.1154268 | -4.4115712 | -1.2658442 |
| H | -2.3074908 | -3.3353929 | -1.2137581 |
| H | -2.7042835 | -4.8226915 | -2.0936018 |
| H | -2.4728749 | -4.8620689 | -0.3353951 |
| C | 2.5539874  | -1.3145301 | -3.6943397 |
| H | 2.7421156  | -1.0949629 | -2.6381848 |
| C | 3.8671791  | -1.8176126 | -4.3212047 |
| H | 4.6334084  | -1.0355777 | -4.2708753 |
| H | 4.2501722  | -2.7028697 | -3.8064990 |
| H | 3.7171162  | -2.0796520 | -5.3748164 |
| C | 2.1203581  | -0.0044667 | -4.3734850 |
| H | 2.8759470  | 0.7708644  | -4.2072433 |
| H | 2.0041447  | -0.1329581 | -5.4557503 |
| H | 1.1728118  | 0.3597835  | -3.9682803 |
| C | 2.5802771  | -4.8424964 | 0.7029429  |
| H | 3.4389884  | -5.4092671 | 1.0834297  |
| H | 2.2532203  | -4.1658391 | 1.4988643  |
| H | 1.7653142  | -5.5495455 | 0.5152637  |
| C | 3.3874659  | -5.1101324 | -2.2453817 |
| H | 4.2227596  | -5.7616805 | -1.9589686 |
| H | 2.5223356  | -5.7457887 | -2.4561211 |
| H | 3.6564851  | -4.6082863 | -3.1790351 |
| C | 4.5441773  | -2.8298007 | -0.5163727 |
| H | 5.3851133  | -3.4314760 | -0.1509999 |
| H | 4.8682934  | -2.3011778 | -1.4184739 |
| H | 4.3174799  | -2.0795342 | 0.2475695  |
| C | 3.2155832  | 1.8752721  | 2.1279960  |
| C | 2.6682363  | 3.0185541  | 2.7555951  |
| C | 3.2732257  | 4.2612582  | 2.5434719  |
| H | 2.8639593  | 5.1410237  | 3.0344557  |
| C | 4.3828509  | 4.3908282  | 1.7147220  |
| H | 4.8468594  | 5.3623096  | 1.5678847  |
| C | 4.8757406  | 3.2712969  | 1.0518590  |
| H | 5.7227415  | 3.3775078  | 0.3789020  |
| C | 4.3017421  | 2.0090657  | 1.2308591  |
| C | 1.4169232  | 2.9377883  | 3.6130980  |
| H | 1.1383556  | 1.8816716  | 3.6819472  |
| C | 0.2578681  | 3.6831984  | 2.9299506  |
| H | -0.6619712 | 3.5899059  | 3.5183368  |
| H | 0.4850250  | 4.7492501  | 2.8182031  |
| H | 0.0709309  | 3.2691789  | 1.9331883  |
| C | 1.6347716  | 3.4652678  | 5.0402784  |
| H | 0.7183490  | 3.3499760  | 5.6301499  |
| H | 2.4384876  | 2.9233012  | 5.5475794  |
| H | 1.8985504  | 4.5286752  | 5.0333283  |
| C | 4.8589127  | 0.8178920  | 0.4709605  |
| H | 4.1610468  | -0.0109310 | 0.6242857  |
| C | 6.2319679  | 0.3909145  | 1.0197175  |
| H | 6.6024167  | -0.4891453 | 0.4821758  |
| H | 6.9629872  | 1.1985457  | 0.8991194  |
| H | 6.1771830  | 0.1450238  | 2.0841695  |
| C | 4.9458841  | 1.0879498  | -1.0400524 |
| H | 5.2894755  | 0.1886916  | -1.5626205 |
| H | 3.9676273  | 1.3662727  | -1.4450288 |
| H | 5.6525772  | 1.8948392  | -1.2634107 |
| C | 4.5321064  | 0.6062708  | 4.7110199  |
| H | 4.9114973  | 0.0187095  | 5.5562921  |

|    |            |            |            |
|----|------------|------------|------------|
| H  | 5.3794505  | 0.8505265  | 4.0624785  |
| H  | 4.1406360  | 1.5493675  | 5.1050645  |
| C  | 3.8865527  | -2.0192008 | 3.2175713  |
| H  | 4.1056921  | -2.6806416 | 4.0648397  |
| H  | 3.1533746  | -2.5284636 | 2.5821731  |
| H  | 4.8054784  | -1.9007853 | 2.6341354  |
| C  | 1.7534696  | -0.7122567 | 4.9402680  |
| H  | 2.0296492  | -1.4272392 | 5.7252842  |
| H  | 1.3909770  | 0.1991274  | 5.4266982  |
| H  | 0.9151635  | -1.1433431 | 4.3809243  |
| Si | -1.1242470 | -0.8039781 | -1.0346296 |
| Si | -0.8833781 | 1.6955850  | -0.3133865 |
| Ge | -1.2483227 | -0.0144235 | 1.3220491  |
| N  | -1.7028856 | 2.8527363  | -1.3209390 |
| N  | -2.6588240 | -0.5721589 | 2.4378779  |
| Si | -3.0504043 | 3.8977785  | -0.8312249 |
| C  | -1.0479706 | 3.0746436  | -2.5986273 |
| Si | -3.1774486 | 0.3684143  | 3.8277677  |
| C  | -3.1974586 | -1.8743848 | 2.1575858  |
| C  | -2.5765683 | 4.8416812  | 0.7233267  |
| C  | -3.4074927 | 5.1086705  | -2.2184696 |
| C  | -4.5498384 | 2.8283189  | -0.4799293 |
| C  | 0.0354795  | 3.9802874  | -2.6775281 |
| C  | -1.4870321 | 2.3649184  | -3.7391480 |
| C  | -4.4913680 | -0.6032553 | 4.7518809  |
| C  | -3.8616101 | 2.0205982  | 3.2491337  |
| C  | -1.7116398 | 0.7176593  | 4.9538936  |
| C  | -2.6438966 | -3.0171254 | 2.7807082  |
| C  | -4.2912739 | -2.0091730 | 1.2699219  |
| H  | -3.4333021 | 5.4050457  | 1.1131921  |
| H  | -2.2389053 | 4.1654284  | 1.5151843  |
| H  | -1.7660543 | 5.5517763  | 0.5279404  |
| H  | -4.2414015 | 5.7593130  | -1.9260414 |
| H  | -2.5445810 | 5.7452823  | -2.4353520 |
| H  | -3.6826645 | 4.6065517  | -3.1501849 |
| H  | -5.3875997 | 3.4296257  | -0.1067358 |
| H  | -4.8817572 | 2.3004356  | -1.3796252 |
| H  | -4.3164324 | 2.0774269  | 0.2813708  |
| C  | 0.6185477  | 4.2110667  | -3.9276878 |
| C  | 0.6016335  | 4.6939277  | -1.4582970 |
| C  | -0.8730442 | 2.6379186  | -4.9661043 |
| C  | -2.5839688 | 1.3126043  | -3.6732979 |
| H  | -4.8621259 | -0.0155259 | 5.6008628  |
| H  | -5.3452827 | -0.8473760 | 4.1119493  |
| H  | -4.0961643 | -1.5463986 | 5.1420527  |
| H  | -4.0746603 | 2.6824987  | 4.0976017  |
| H  | -3.1343312 | 2.5302725  | 2.6073193  |
| H  | -4.7851330 | 1.9004964  | 2.6733537  |
| H  | -1.9806467 | 1.4345341  | 5.7396667  |
| H  | -1.3447779 | -0.1925975 | 5.4391607  |
| H  | -0.8784061 | 1.1473549  | 4.3859222  |
| C  | -3.2495372 | -4.2603858 | 2.5737418  |
| C  | -1.3856242 | -2.9352513 | 3.6278773  |
| C  | -4.8656686 | -3.2719167 | 1.0959009  |
| C  | -4.8560957 | -0.8185104 | 0.5148920  |
| H  | 1.4485257  | 4.9089609  | -4.0025736 |
| C  | 0.1630985  | 3.5599602  | -5.0686859 |
| H  | 0.0874146  | 4.3055271  | -0.5730764 |
| C  | 0.3560546  | 6.2125261  | -1.5187058 |
| C  | 2.1023756  | 4.4107013  | -1.2805934 |
| H  | -1.2070641 | 2.1069056  | -5.8532762 |
| H  | -2.7639676 | 1.0935188  | -2.6156318 |
| C  | -3.9020571 | 1.8151159  | -4.2902935 |
| C  | -2.1552252 | 0.0022799  | -4.3550203 |
| H  | -2.8353251 | -5.1397611 | 3.0612662  |
| C  | -4.3660283 | -4.3910041 | 1.7544464  |
| H  | -1.1071092 | -1.8789468 | 3.6939440  |
| C  | -0.2317612 | -3.6804430 | 2.9357655  |
| C  | -1.5916297 | -3.4621288 | 5.0570507  |

|   |            |            |            |
|---|------------|------------|------------|
| H | -5.7183209 | -3.3789148 | 0.4302524  |
| H | -4.1576880 | 0.0109377  | 0.6622684  |
| C | -6.2247579 | -0.3928168 | 1.0755113  |
| C | -4.9559280 | -1.0885758 | -0.9953279 |
| H | 0.6271792  | 3.7552198  | -6.0315124 |
| H | -0.7096470 | 6.4490053  | -1.5870104 |
| H | 0.7586662  | 6.6970973  | -0.6219696 |
| H | 0.8530352  | 6.6496248  | -2.3920687 |
| H | 2.2940673  | 3.3344660  | -1.2283140 |
| H | 2.6856775  | 4.8202041  | -2.1130730 |
| H | 2.4667222  | 4.8622491  | -0.3533357 |
| H | -4.6677220 | 1.0329591  | -4.2336356 |
| H | -4.2812337 | 2.7005796  | -3.7731037 |
| H | -3.7601732 | 2.0766370  | -5.3451611 |
| H | -2.9092345 | -0.7732092 | -4.1824242 |
| H | -2.0474670 | 0.1301186  | -5.4382389 |
| H | -1.2044402 | -0.3614242 | -3.9569532 |
| H | -4.8303739 | -5.3629186 | 1.6115816  |
| H | 0.6927976  | -3.5862694 | 3.5165465  |
| H | -0.4592197 | -4.7466950 | 2.8265662  |
| H | -0.0531720 | -3.2669651 | 1.9372462  |
| H | -0.6703932 | -3.3464608 | 5.6393073  |
| H | -2.3912064 | -2.9200561 | 5.5707483  |
| H | -1.8553179 | -4.5255725 | 5.0527316  |
| H | -6.6005155 | 0.4870507  | 0.5413502  |
| H | -6.9561234 | -1.2010193 | 0.9610095  |
| H | -6.1610735 | -0.1471190 | 2.1395222  |
| H | -5.3051100 | -0.1896973 | -1.5148311 |
| H | -3.9809036 | -1.3657214 | -1.4088356 |
| H | -5.6635781 | -1.8962969 | -1.2125517 |

### (3) Si<sub>4</sub>Ge<sub>2</sub>{N(SiMe<sub>3</sub>)Dipp}<sub>4</sub>

178

Energy = -9040.392279460 Hartree

|    |            |            |            |
|----|------------|------------|------------|
| Ge | 1.1608626  | 0.8418991  | -1.0994141 |
| Si | 0.8855217  | -1.7022080 | -0.2715206 |
| Si | 1.1845550  | 0.0100563  | 1.2517593  |
| Si | 3.0713523  | -3.9340501 | -0.8152625 |
| Si | 3.0723295  | -0.3696457 | 3.7045614  |
| N  | 1.7185978  | -2.8788542 | -1.2622124 |
| N  | 2.4754176  | 0.5432542  | 2.3091728  |
| C  | 1.0435429  | -3.1256968 | -2.5269750 |
| C  | -0.0297317 | -4.0453479 | -2.5787060 |
| C  | -0.6336578 | -4.2968897 | -3.8151943 |
| H  | -1.4561750 | -5.0056809 | -3.8665673 |
| C  | -0.2073648 | -3.6542344 | -4.9715595 |
| H  | -0.6869530 | -3.8650980 | -5.9234628 |
| C  | 0.8224665  | -2.7224754 | -4.8982397 |
| H  | 1.1366441  | -2.2006818 | -5.7979301 |
| C  | 1.4564504  | -2.4290709 | -3.6862560 |
| C  | -0.5620534 | -4.7604482 | -1.3453760 |
| H  | -0.0321670 | -4.3644853 | -0.4730894 |
| C  | -0.3052604 | -6.2772699 | -1.4088276 |
| H  | 0.7598552  | -6.5060059 | -1.5044017 |
| H  | -0.6805669 | -6.7628665 | -0.5007777 |
| H  | -0.8215282 | -6.7206724 | -2.2677216 |
| C  | -2.0613068 | -4.4936785 | -1.1362443 |
| H  | -2.2637378 | -3.4210100 | -1.0623406 |
| H  | -2.6557743 | -4.8959410 | -1.9642918 |
| H  | -2.4041647 | -4.9638272 | -0.2102989 |
| C  | 2.5495588  | -1.3708785 | -3.6596573 |
| H  | 2.7341366  | -1.1186441 | -2.6101751 |
| C  | 3.8674026  | -1.8850904 | -4.2679508 |
| H  | 4.6253038  | -1.0935249 | -4.2485989 |
| H  | 4.2608981  | -2.7453133 | -3.7205196 |
| H  | 3.7188367  | -2.1884321 | -5.3106630 |
| C  | 2.1154221  | -0.0849175 | -4.3832843 |

|    |            |            |            |
|----|------------|------------|------------|
| H  | 2.8603998  | 0.7023218  | -4.2253590 |
| H  | 2.0223217  | -0.2455138 | -5.4635437 |
| H  | 1.1567465  | 0.2811435  | -4.0069834 |
| C  | 2.6511002  | -4.9171827 | 0.7311684  |
| H  | 3.5232307  | -5.4925136 | 1.0662539  |
| H  | 2.3461367  | -4.2708812 | 1.5589996  |
| H  | 1.8348427  | -5.6228657 | 0.5444538  |
| C  | 3.3963951  | -5.1367335 | -2.2193194 |
| H  | 4.2376203  | -5.7870252 | -1.9468463 |
| H  | 2.5298799  | -5.7744302 | -2.4173704 |
| H  | 3.6488683  | -4.6340994 | -3.1567384 |
| C  | 4.5864466  | -2.8774092 | -0.4939810 |
| H  | 5.4296908  | -3.4867965 | -0.1472433 |
| H  | 4.8978456  | -2.3461892 | -1.3991029 |
| H  | 4.3777577  | -2.1299351 | 0.2765842  |
| C  | 3.0690112  | 1.8399379  | 2.0426152  |
| C  | 2.5555952  | 2.9845766  | 2.6910811  |
| C  | 3.2142920  | 4.2071394  | 2.5264597  |
| H  | 2.8297388  | 5.0886889  | 3.0336861  |
| C  | 4.3460992  | 4.3127960  | 1.7257100  |
| H  | 4.8524035  | 5.2676784  | 1.6145607  |
| C  | 4.8083636  | 3.1913715  | 1.0456065  |
| H  | 5.6756164  | 3.2793425  | 0.3966033  |
| C  | 4.1822522  | 1.9473684  | 1.1785879  |
| C  | 1.2921760  | 2.9304469  | 3.5315701  |
| H  | 0.9645203  | 1.8866107  | 3.5524194  |
| C  | 0.1768996  | 3.7558460  | 2.8708188  |
| H  | -0.7514050 | 3.6798908  | 3.4478893  |
| H  | 0.4522869  | 4.8142837  | 2.8053920  |
| H  | -0.0173855 | 3.3907938  | 1.8566364  |
| C  | 1.5184824  | 3.3903871  | 4.9808010  |
| H  | 0.5894026  | 3.3022373  | 5.5550236  |
| H  | 2.2848708  | 2.7879862  | 5.4774370  |
| H  | 1.8383683  | 4.4375892  | 5.0170104  |
| C  | 4.7304830  | 0.7565741  | 0.4099783  |
| H  | 4.0021641  | -0.0547879 | 0.5100549  |
| C  | 6.0727958  | 0.2806164  | 0.9951120  |
| H  | 6.4471349  | -0.5850951 | 0.4383064  |
| H  | 6.8213738  | 1.0784688  | 0.9309903  |
| H  | 5.9766548  | -0.0039586 | 2.0463424  |
| C  | 4.8935029  | 1.0619363  | -1.0883168 |
| H  | 5.2140422  | 0.1597971  | -1.6201468 |
| H  | 3.9499699  | 1.4010582  | -1.5266317 |
| H  | 5.6501621  | 1.8358639  | -1.2581383 |
| C  | 4.4156834  | 0.6285740  | 4.5537964  |
| H  | 4.8260065  | 0.0465949  | 5.3887971  |
| H  | 5.2399278  | 0.8801433  | 3.8800363  |
| H  | 4.0281575  | 1.5687051  | 4.9578218  |
| C  | 3.7409931  | -2.0278359 | 3.1339344  |
| H  | 3.9682868  | -2.6755905 | 3.9894369  |
| H  | 2.9971398  | -2.5415741 | 2.5161499  |
| H  | 4.6527533  | -1.9232400 | 2.5381465  |
| C  | 1.6763969  | -0.7011024 | 4.9151114  |
| H  | 2.0072174  | -1.3898839 | 5.7024937  |
| H  | 1.3256023  | 0.2168388  | 5.3963178  |
| H  | 0.8200514  | -1.1601868 | 4.4112642  |
| Ge | -1.1706929 | -0.8432289 | -1.0889015 |
| Si | -0.8883023 | 1.7011984  | -0.2651815 |
| Si | -1.1749772 | -0.0096481 | 1.2617884  |
| N  | -1.7290305 | 2.8782204  | -1.2486500 |
| N  | -2.4559475 | -0.5424146 | 2.3313572  |
| Si | -3.0779575 | 3.9334616  | -0.7903626 |
| C  | -1.0651570 | 3.1245839  | -2.5193863 |
| Si | -3.0428392 | 0.3723071  | 3.7297493  |
| C  | -3.0512682 | -1.8395010 | 2.0705462  |
| C  | -2.6433812 | 4.9161236  | 0.7523777  |
| C  | -3.4147532 | 5.1361148  | -2.1916283 |
| C  | -4.5907701 | 2.8774214  | -0.4564546 |
| C  | 0.0081135  | 4.0436833  | -2.5804976 |

|   |            |            |            |
|---|------------|------------|------------|
| C | -1.4890417 | 2.4286958  | -3.6750999 |
| C | -4.3773106 | -0.6265263 | 4.5922223  |
| C | -3.7196265 | 2.0281694  | 3.1619429  |
| C | -1.6368935 | 0.7083134  | 4.9273578  |
| C | -2.5308344 | -2.9836570 | 2.7142593  |
| C | -4.1721360 | -1.9480041 | 1.2165796  |
| H | -3.5134162 | 5.4877790  | 1.0989493  |
| H | -2.3258155 | 4.2697569  | 1.5754121  |
| H | -1.8319777 | 5.6250103  | 0.5566921  |
| H | -4.2542585 | 5.7858316  | -1.9125743 |
| H | -2.5502777 | 5.7743988  | -2.3965827 |
| H | -3.6742895 | 4.6331637  | -3.1269527 |
| H | -5.4298467 | 3.4867974  | -0.0997269 |
| H | -4.9117941 | 2.3489076  | -1.3598030 |
| H | -4.3752024 | 2.1277215  | 0.3100337  |
| C | 0.6010976  | 4.2951609  | -3.8222696 |
| C | 0.5517851  | 4.7581811  | -1.3517793 |
| C | -0.8658687 | 2.7221507  | -4.8926794 |
| C | -2.5828402 | 1.3714801  | -3.6391655 |
| H | -4.7802053 | -0.0442974 | 5.4306632  |
| H | -5.2077286 | -0.8789754 | 3.9263909  |
| H | -3.9854734 | -1.5661970 | 4.9931160  |
| H | -3.9424583 | 2.6763338  | 4.0183149  |
| H | -2.9816948 | 2.5432267  | 2.5381910  |
| H | -4.6354083 | 1.9204799  | 2.5729044  |
| H | -1.9611167 | 1.3997983  | 5.7150968  |
| H | -1.2817630 | -0.2078917 | 5.4086854  |
| H | -0.7849914 | 1.1658254  | 4.4145746  |
| C | -3.1894997 | -4.2069614 | 2.5551211  |
| C | -1.2603546 | -2.9281764 | 3.5439872  |
| C | -4.7980575 | -3.1926676 | 1.0889960  |
| C | -4.7280540 | -0.7579025 | 0.4524658  |
| H | 1.4235696  | 5.0034555  | -3.8808402 |
| C | 0.1639383  | 3.6531744  | -4.9749636 |
| H | 0.0290537  | 4.3627649  | -0.4749586 |
| C | 0.2960235  | 6.2752620  | -1.4130749 |
| C | 2.0525171  | 4.4899271  | -1.1556185 |
| H | -1.1885360 | 2.2008722  | -5.7896714 |
| H | -2.7593151 | 1.1199356  | -2.5881206 |
| C | -3.9049910 | 1.8862759  | -4.2375238 |
| C | -2.1552385 | 0.0848090  | -4.3654744 |
| H | -2.7994329 | -5.0881836 | 3.0586988  |
| C | -4.3283810 | -4.3137235 | 1.7646060  |
| H | -0.9325801 | -1.8843028 | 3.5604201  |
| C | -0.1505123 | -3.7547046 | 2.8755805  |
| C | -1.4748680 | -3.3857666 | 4.9957776  |
| H | -5.6710192 | -3.2814502 | 0.4477970  |
| H | -4.0005010 | 0.0547039  | 0.5478031  |
| C | -6.0671466 | -0.2845344 | 1.0469510  |
| C | -4.9009279 | -1.0630709 | -1.0447867 |
| H | 0.6350872  | 3.8640035  | -5.9310783 |
| H | -0.7696510 | 6.5050686  | -1.4995760 |
| H | 0.6795525  | 6.7604824  | -0.5082673 |
| H | 0.8053878  | 6.7181385  | -2.2763472 |
| H | 2.2545886  | 3.4170291  | -1.0840083 |
| H | 2.6402595  | 4.8920630  | -1.9885218 |
| H | 2.4037157  | 4.9592581  | -0.2323893 |
| H | -4.6634254 | 1.0954198  | -4.2113260 |
| H | -4.2933623 | 2.7474704  | -3.6879384 |
| H | -3.7644304 | 2.1883798  | -5.2816985 |
| H | -2.8994436 | -0.7019006 | -4.2013589 |
| H | -2.0704097 | 0.2448783  | -5.4464968 |
| H | -1.1938867 | -0.2816707 | -3.9964660 |
| H | -4.8345538 | -5.2691702 | 1.6577727  |
| H | 0.7827735  | -3.6766162 | 3.4442326  |
| H | -0.4257051 | -4.8135048 | 2.8154086  |
| H | 0.0346491  | -3.3922560 | 1.8587596  |
| H | -0.5407122 | -3.2985858 | 5.5618540  |
| H | -2.2358151 | -2.7813125 | 5.4982508  |

|   |            |            |            |
|---|------------|------------|------------|
| H | -1.7963972 | -4.4323202 | 5.0360664  |
| H | -6.4463148 | 0.5812386  | 0.4935107  |
| H | -6.8150622 | -1.0833243 | 0.9868418  |
| H | -5.9645585 | -0.0009633 | 2.0978419  |
| H | -5.2280067 | -0.1616973 | -1.5739116 |
| H | -3.9595730 | -1.3992109 | -1.4900239 |
| H | -5.6564343 | -1.8392516 | -1.2093749 |

#### (4) Si<sub>4</sub>Ge<sub>2</sub>{N(SiMe<sub>3</sub>)Dipp}<sub>4</sub>

178

Energy = -9040.338758010 Hartree

|    |            |            |            |
|----|------------|------------|------------|
| Si | 1.1142921  | 0.8171325  | -1.0483715 |
| Ge | 0.9099081  | -1.7647316 | -0.2069439 |
| Si | 1.2241945  | 0.1415615  | 1.2427593  |
| Si | 3.0874239  | -4.0157191 | -0.9125993 |
| Si | 3.0292806  | -0.3122655 | 3.7155255  |
| N  | 1.7817150  | -2.9422531 | -1.3947478 |
| N  | 2.5063614  | 0.6360580  | 2.3095022  |
| C  | 1.0698118  | -3.1004019 | -2.6335098 |
| C  | -0.0338734 | -3.9852781 | -2.7130368 |
| C  | -0.6810561 | -4.1407851 | -3.9431662 |
| H  | -1.5241113 | -4.8236044 | -4.0140603 |
| C  | -0.2725802 | -3.4355150 | -5.0692177 |
| H  | -0.7861932 | -3.5722507 | -6.0169489 |
| C  | 0.7814585  | -2.5328551 | -4.9681801 |
| H  | 1.0785492  | -1.9587223 | -5.8413903 |
| C  | 1.4572676  | -2.3345531 | -3.7605516 |
| C  | -0.5518668 | -4.7580153 | -1.5089371 |
| H  | 0.0198886  | -4.4341854 | -0.6331844 |
| C  | -0.3457749 | -6.2752389 | -1.6704784 |
| H  | 0.7091189  | -6.5279045 | -1.8106006 |
| H  | -0.7109578 | -6.8046997 | -0.7829358 |
| H  | -0.8984077 | -6.6499886 | -2.5394212 |
| C  | -2.0337055 | -4.4556407 | -1.2317135 |
| H  | -2.1970686 | -3.3821242 | -1.0951432 |
| H  | -2.6695623 | -4.7925986 | -2.0582324 |
| H  | -2.3616417 | -4.9639060 | -0.3200737 |
| C  | 2.5782096  | -1.3092109 | -3.6866215 |
| H  | 2.7496680  | -1.0974222 | -2.6255195 |
| C  | 3.8899605  | -1.8549620 | -4.2799511 |
| H  | 4.6805810  | -1.0984699 | -4.2146889 |
| H  | 4.2294008  | -2.7497054 | -3.7518804 |
| H  | 3.7554024  | -2.1176000 | -5.3356032 |
| C  | 2.2031707  | 0.0122857  | -4.3762159 |
| H  | 2.9737394  | 0.7660657  | -4.1814306 |
| H  | 2.1228871  | -0.1077875 | -5.4628121 |
| H  | 1.2522742  | 0.4018451  | -4.0031970 |
| C  | 2.6008407  | -4.9737400 | 0.6349952  |
| H  | 3.4531410  | -5.5413074 | 1.0290811  |
| H  | 2.2576855  | -4.3036932 | 1.4311892  |
| H  | 1.7915224  | -5.6824970 | 0.4286413  |
| C  | 3.4464720  | -5.2232281 | -2.3051025 |
| H  | 4.2347980  | -5.9202811 | -1.9940376 |
| H  | 2.5621044  | -5.8114814 | -2.5679413 |
| H  | 3.7835443  | -4.7195559 | -3.2157963 |
| C  | 4.6075053  | -2.9828013 | -0.5247627 |
| H  | 5.4264563  | -3.6007148 | -0.1369472 |
| H  | 4.9672474  | -2.4574989 | -1.4156072 |
| H  | 4.3731174  | -2.2290993 | 0.2339255  |
| C  | 3.1551332  | 1.9026958  | 2.0319683  |
| C  | 2.6843956  | 3.0720993  | 2.6684254  |
| C  | 3.3808504  | 4.2690603  | 2.4746444  |
| H  | 3.0307329  | 5.1723015  | 2.9681791  |
| C  | 4.5062459  | 4.3228452  | 1.6588804  |
| H  | 5.0402140  | 5.2593201  | 1.5235622  |
| C  | 4.9278771  | 3.1749427  | 0.9966974  |
| H  | 5.7914158  | 3.2231870  | 0.3386379  |

|    |            |            |            |
|----|------------|------------|------------|
| C  | 4.2640246  | 1.9540248  | 1.1592170  |
| C  | 1.4232170  | 3.0707850  | 3.5153215  |
| H  | 1.0919480  | 2.0319857  | 3.6059849  |
| C  | 0.3074394  | 3.8514947  | 2.8011028  |
| H  | -0.6190961 | 3.8220927  | 3.3851049  |
| H  | 0.5892528  | 4.9006978  | 2.6585041  |
| H  | 0.1059790  | 3.4165139  | 1.8162449  |
| C  | 1.6501673  | 3.6225138  | 4.9316533  |
| H  | 0.7248412  | 3.5544667  | 5.5145677  |
| H  | 2.4283596  | 3.0626453  | 5.4590613  |
| H  | 1.9528096  | 4.6750317  | 4.9048672  |
| C  | 4.7653923  | 0.7300044  | 0.4108827  |
| H  | 4.0262155  | -0.0654316 | 0.5532322  |
| C  | 6.1122368  | 0.2432749  | 0.9761144  |
| H  | 6.4495889  | -0.6516361 | 0.4425318  |
| H  | 6.8782421  | 1.0187282  | 0.8627541  |
| H  | 6.0371252  | 0.0006066  | 2.0400230  |
| C  | 4.8868920  | 0.9918173  | -1.0993875 |
| H  | 5.1855705  | 0.0732673  | -1.6152437 |
| H  | 3.9316532  | 1.3242972  | -1.5174505 |
| H  | 5.6417117  | 1.7567601  | -1.3125315 |
| C  | 4.3885578  | 0.6326563  | 4.5966423  |
| H  | 4.7514782  | 0.0427119  | 5.4476160  |
| H  | 5.2403619  | 0.8399659  | 3.9417339  |
| H  | 4.0306273  | 1.5927229  | 4.9809623  |
| C  | 3.6500661  | -1.9873800 | 3.1402311  |
| H  | 3.8636949  | -2.6416639 | 3.9943319  |
| H  | 2.8947974  | -2.4840019 | 2.5218025  |
| H  | 4.5643087  | -1.9010908 | 2.5446898  |
| C  | 1.5709577  | -0.5775742 | 4.8668682  |
| H  | 1.8118748  | -1.3154523 | 5.6419018  |
| H  | 1.2748558  | 0.3512185  | 5.3647946  |
| H  | 0.7017704  | -0.9488210 | 4.3134985  |
| Si | -1.1078416 | -0.7933921 | -1.0385774 |
| Si | -0.8915912 | 1.6746954  | -0.2791465 |
| Ge | -1.2044506 | -0.0288551 | 1.3558523  |
| N  | -1.6986042 | 2.8572386  | -1.2677849 |
| N  | -2.5808344 | -0.6029533 | 2.5092252  |
| Si | -3.0707701 | 3.8792498  | -0.7950113 |
| C  | -1.0364982 | 3.1075228  | -2.5376719 |
| Si | -3.1830006 | 0.3926611  | 3.8237254  |
| C  | -3.1288286 | -1.9027786 | 2.2248191  |
| C  | -2.6455941 | 4.7999358  | 0.7869234  |
| C  | -3.4027339 | 5.1145376  | -2.1669806 |
| C  | -4.5724223 | 2.7928073  | -0.5121221 |
| C  | 0.0370111  | 4.0260741  | -2.5928947 |
| C  | -1.4627702 | 2.4174476  | -3.6948243 |
| C  | -4.3976177 | -0.6244389 | 4.8308263  |
| C  | -4.0173807 | 1.9430951  | 3.1641430  |
| C  | -1.7466518 | 0.9534078  | 4.8995326  |
| C  | -2.6051664 | -3.0420714 | 2.8810085  |
| C  | -4.1961276 | -2.0439207 | 1.3058158  |
| H  | -3.5180215 | 5.3455140  | 1.1669362  |
| H  | -2.3155873 | 4.1150589  | 1.5742301  |
| H  | -1.8402310 | 5.5233211  | 0.6207646  |
| H  | -4.2519985 | 5.7494591  | -1.8840990 |
| H  | -2.5419401 | 5.7651342  | -2.3475437 |
| H  | -3.6466269 | 4.6284399  | -3.1157367 |
| H  | -5.4202469 | 3.3790351  | -0.1377139 |
| H  | -4.8819028 | 2.2972855  | -1.4378127 |
| H  | -4.3552792 | 2.0154429  | 0.2265364  |
| C  | 0.6252943  | 4.2876460  | -3.8343971 |
| C  | 0.5892397  | 4.7198688  | -1.3564933 |
| C  | -0.8435203 | 2.7203563  | -4.9122513 |
| C  | -2.5504060 | 1.3541995  | -3.6603740 |
| H  | -4.8415113 | -0.0046509 | 5.6196969  |
| H  | -5.2110825 | -1.0191203 | 4.2132877  |
| H  | -3.9061210 | -1.4771918 | 5.3094607  |
| H  | -4.2955698 | 2.6164705  | 3.9846604  |

|   |            |            |            |
|---|------------|------------|------------|
| H | -3.3348727 | 2.4917024  | 2.5061510  |
| H | -4.9223967 | 1.7187780  | 2.5915634  |
| H | -2.0749823 | 1.7064016  | 5.6266334  |
| H | -1.3027398 | 0.1195494  | 5.4523134  |
| H | -0.9554028 | 1.4060034  | 4.2905350  |
| C | -3.1877265 | -4.2903960 | 2.6419711  |
| C | -1.4051162 | -2.9503490 | 3.8074521  |
| C | -4.7504291 | -3.3117575 | 1.1039410  |
| C | -4.7774911 | -0.8548345 | 0.5610902  |
| H | 1.4482872  | 4.9955245  | -3.8902950 |
| C | 0.1839716  | 3.6540979  | -4.9906786 |
| H | 0.0690502  | 4.3127207  | -0.4836145 |
| C | 0.3378321  | 6.2381782  | -1.3893474 |
| C | 2.0893531  | 4.4381633  | -1.1735434 |
| H | -1.1671518 | 2.2033864  | -5.8114858 |
| H | -2.7472787 | 1.1195604  | -2.6091463 |
| C | -3.8616926 | 1.8516632  | -4.2957475 |
| C | -2.0956798 | 0.0573488  | -4.3509324 |
| H | -2.7904007 | -5.1665089 | 3.1485134  |
| C | -4.2624634 | -4.4301931 | 1.7706316  |
| H | -1.2021759 | -1.8872140 | 3.9676649  |
| C | -0.1692709 | -3.5739125 | 3.1353536  |
| C | -1.6538851 | -3.5987713 | 5.1786265  |
| H | -5.5791656 | -3.4222697 | 0.4095089  |
| H | -4.0989493 | -0.0113676 | 0.7241632  |
| C | -6.1593779 | -0.4761394 | 1.1251500  |
| C | -4.8729506 | -1.1012177 | -0.9531615 |
| H | 0.6520644  | 3.8724116  | -5.9465639 |
| H | -0.7284348 | 6.4714459  | -1.4600637 |
| H | 0.7322006  | 6.7068274  | -0.4804735 |
| H | 0.8387863  | 6.6947376  | -2.2503689 |
| H | 2.2834542  | 3.3617744  | -1.1348309 |
| H | 2.6762629  | 4.8599797  | -1.9972061 |
| H | 2.4475950  | 4.8789993  | -0.2389182 |
| H | -4.6222176 | 1.0634197  | -4.2577656 |
| H | -4.2564719 | 2.7308725  | -3.7794367 |
| H | -3.7038954 | 2.1215631  | -5.3462514 |
| H | -2.8436897 | -0.7286919 | -4.2020955 |
| H | -1.9699695 | 0.2012119  | -5.4302132 |
| H | -1.1483021 | -0.3019326 | -3.9415102 |
| H | -4.7078082 | -5.4066743 | 1.6010922  |
| H | 0.7084379  | -3.4996467 | 3.7869257  |
| H | -0.3412734 | -4.6324161 | 2.9107793  |
| H | 0.0574470  | -3.0621163 | 2.1931558  |
| H | -0.7897006 | -3.4373902 | 5.8328657  |
| H | -2.5378653 | -3.1770998 | 5.6665552  |
| H | -1.8050178 | -4.6800598 | 5.0876796  |
| H | -6.5456953 | 0.4197708  | 0.6261694  |
| H | -6.8736924 | -1.2917353 | 0.9646911  |
| H | -6.1133006 | -0.2802318 | 2.2002991  |
| H | -5.2416796 | -0.2011564 | -1.4566959 |
| H | -3.8938014 | -1.3516542 | -1.3734173 |
| H | -5.5652373 | -1.9188429 | -1.1822554 |

### (1) Si<sub>3</sub>Ge<sub>3</sub>{N(SiMe<sub>3</sub>)Dipp}<sub>4</sub>

178

Energy = -10827.84564342 Hartree

|    |           |            |            |
|----|-----------|------------|------------|
| Ge | 1.2232283 | -0.6965658 | 1.1326546  |
| Si | 0.7291712 | 1.7556345  | 0.1063048  |
| Ge | 1.0521985 | -0.0803519 | -1.3709379 |
| Si | 2.8106884 | 4.1100699  | 0.2964992  |
| Si | 2.8184949 | 0.2116846  | -4.0183053 |
| N  | 1.5595243 | 3.0376419  | 0.9526460  |
| N  | 2.4071573 | -0.6625113 | -2.5520777 |
| C  | 0.9698964 | 3.3454975  | 2.2445983  |



|   |            |            |            |
|---|------------|------------|------------|
| C | -0.1601161 | 4.1939790  | 2.3113202  |
| C | -0.6845721 | 4.5069092  | 3.5698265  |
| H | -1.5494877 | 5.1622257  | 3.6334185  |
| C | -0.1267431 | 3.9910621  | 4.7338904  |
| H | -0.5468019 | 4.2480708  | 5.7024288  |
| C | 0.9589332  | 3.1257881  | 4.6496395  |
| H | 1.3769491  | 2.7019760  | 5.5585050  |
| C | 1.5186864  | 2.7756595  | 3.4164417  |
| C | -0.8337732 | 4.7688123  | 1.0733232  |
| H | -0.3527858 | 4.3277877  | 0.1941093  |
| C | -0.6642493 | 6.2967633  | 0.9887285  |
| H | 0.3895810  | 6.5882640  | 0.9711889  |
| H | -1.1418589 | 6.6807870  | 0.0801107  |
| H | -1.1329515 | 6.7855041  | 1.8502988  |
| C | -2.3262513 | 4.4050092  | 1.0142926  |
| H | -2.4692540 | 3.3207937  | 1.0533012  |
| H | -2.8777945 | 4.8513506  | 1.8493575  |
| H | -2.7675036 | 4.7679102  | 0.0815142  |
| C | 2.6799238  | 1.7929413  | 3.3800898  |
| H | 2.7978016  | 1.4660522  | 2.3417905  |
| C | 4.0012721  | 2.4425822  | 3.8305919  |
| H | 4.8114684  | 1.7048367  | 3.8060925  |
| H | 4.2842026  | 3.2790700  | 3.1867305  |
| H | 3.9156799  | 2.8203030  | 4.8559644  |
| C | 2.4006304  | 0.5468031  | 4.2377346  |
| H | 3.1847137  | -0.2008208 | 4.0769122  |
| H | 2.3857415  | 0.7916782  | 5.3059399  |
| H | 1.4425240  | 0.0886895  | 3.9780703  |
| C | 2.2021370  | 4.8992213  | -1.2973073 |
| H | 3.0039490  | 5.4788373  | -1.7713327 |
| H | 1.8684852  | 4.1484070  | -2.0201354 |
| H | 1.3613253  | 5.5757162  | -1.1114888 |
| C | 3.1728068  | 5.4612511  | 1.5475683  |
| H | 3.9673150  | 6.1096251  | 1.1566489  |
| H | 2.2945621  | 6.0852408  | 1.7378413  |
| H | 3.5042796  | 5.0662792  | 2.5115938  |
| C | 4.3508862  | 3.1004338  | -0.0542860 |
| H | 5.1236445  | 3.7096945  | -0.5383721 |
| H | 4.7713387  | 2.6823988  | 0.8657715  |
| H | 4.1179578  | 2.2672041  | -0.7238505 |
| C | 3.0757428  | -1.8890750 | -2.2129081 |
| C | 2.6027470  | -3.1141574 | -2.7393506 |
| C | 3.3272392  | -4.2843377 | -2.4936912 |
| H | 2.9721647  | -5.2251083 | -2.9076169 |
| C | 4.4897131  | -4.2648388 | -1.7301615 |
| H | 5.0471615  | -5.1811194 | -1.5559917 |
| C | 4.9181669  | -3.0662605 | -1.1695046 |
| H | 5.8116997  | -3.0546504 | -0.5507685 |
| C | 4.2241262  | -1.8715533 | -1.3855896 |
| C | 1.3068156  | -3.1922754 | -3.5265267 |
| H | 0.9701884  | -2.1646516 | -3.6917767 |
| C | 0.2306749  | -3.9122088 | -2.6962621 |
| H | -0.7211408 | -3.9446413 | -3.2385177 |
| H | 0.5317484  | -4.9413829 | -2.4710820 |
| H | 0.0682507  | -3.3907702 | -1.7459839 |
| C | 1.4727309  | -3.8638181 | -4.8986148 |
| H | 0.5228591  | -3.8445105 | -5.4449121 |
| H | 2.2266143  | -3.3522345 | -5.5046575 |
| H | 1.7780710  | -4.9110224 | -4.7960374 |
| C | 4.7359644  | -0.5890838 | -0.7529087 |
| H | 3.9551988  | 0.1667816  | -0.8869990 |
| C | 6.0123631  | -0.0928398 | -1.4562250 |
| H | 6.3515805  | 0.8508441  | -1.0151023 |
| H | 6.8172508  | -0.8292605 | -1.3509051 |
| H | 5.8440674  | 0.0677375  | -2.5246993 |
| C | 4.9906868  | -0.7447277 | 0.7551604  |
| H | 5.2834408  | 0.2185121  | 1.1865380  |
| H | 4.0914835  | -1.0924098 | 1.2731496  |
| H | 5.7984844  | -1.4578798 | 0.9533880  |

|    |            |            |            |
|----|------------|------------|------------|
| C  | 4.1290652  | -0.7602172 | -4.9483418 |
| H  | 4.4485031  | -0.1984128 | -5.8350450 |
| H  | 5.0137004  | -0.9534193 | -4.3335461 |
| H  | 3.7473025  | -1.7295928 | -5.2838118 |
| C  | 3.4478676  | 1.9307029  | -3.5917064 |
| H  | 3.5842359  | 2.5382673  | -4.4948967 |
| H  | 2.7254764  | 2.4482927  | -2.9510822 |
| H  | 4.4022994  | 1.9006342  | -3.0571109 |
| C  | 1.2977984  | 0.4297061  | -5.1026387 |
| H  | 1.5146577  | 1.0983317  | -5.9450535 |
| H  | 0.9455465  | -0.5231634 | -5.5102873 |
| H  | 0.4725514  | 0.8721465  | -4.5339654 |
| Ge | -1.2029379 | 0.8175712  | 1.1343688  |
| Si | -0.7824262 | -1.7868675 | 0.4870077  |
| Si | -1.3677447 | -0.2149265 | -1.1098469 |
| N  | -1.4581686 | -2.9519658 | 1.5974476  |
| N  | -2.7516750 | 0.1235716  | -2.1206049 |
| Si | -2.7493474 | -4.1274632 | 1.2879123  |
| C  | -0.6880061 | -3.0657701 | 2.8257971  |
| Si | -3.3160576 | -0.9281720 | -3.4306310 |
| C  | -3.4067960 | 1.4028998  | -1.9239740 |
| C  | -2.3225382 | -5.1732556 | -0.2153979 |
| C  | -2.9182360 | -5.2543444 | 2.7790172  |
| C  | -4.3472217 | -3.1958804 | 0.9821329  |
| C  | 0.4476270  | -3.9073706 | 2.8625346  |
| C  | -1.0697571 | -2.3122616 | 3.9595528  |
| C  | -4.7827066 | -0.1137278 | -4.2711367 |
| C  | -3.8098695 | -2.5941481 | -2.7231921 |
| C  | -1.9315886 | -1.2080591 | -4.6672404 |
| C  | -3.0067154 | 2.5174374  | -2.6930703 |
| C  | -4.4606725 | 1.5173555  | -0.9895893 |
| H  | -3.1776051 | -5.7944913 | -0.5093087 |
| H  | -2.0498755 | -4.5584280 | -1.0783398 |
| H  | -1.4789642 | -5.8395713 | -0.0065258 |
| H  | -3.7180840 | -5.9819663 | 2.5906249  |
| H  | -1.9970277 | -5.8116647 | 2.9733872  |
| H  | -3.1671878 | -4.7097704 | 3.6938767  |
| H  | -5.1615396 | -3.8783939 | 0.7108669  |
| H  | -4.6528416 | -2.6344999 | 1.8710311  |
| H  | -4.2250148 | -2.4821733 | 0.1625541  |
| C  | 1.1497912  | -4.0264847 | 4.0665238  |
| C  | 0.9468177  | -4.6695755 | 1.6439011  |
| C  | -0.3364492 | -2.4727886 | 5.1399422  |
| C  | -2.2327037 | -1.3314304 | 3.9342832  |
| H  | -5.1528563 | -0.7693579 | -5.0694871 |
| H  | -5.6078823 | 0.0699039  | -3.5763795 |
| H  | -4.5163531 | 0.8472665  | -4.7209058 |
| H  | -4.0164257 | -3.3147522 | -3.5239530 |
| H  | -2.9994726 | -3.0023279 | -2.1106141 |
| H  | -4.7016841 | -2.5247264 | -2.0928272 |
| H  | -2.1985390 | -1.9989604 | -5.3791212 |
| H  | -1.7031328 | -0.3033426 | -5.2383884 |
| H  | -1.0131711 | -1.5176831 | -4.1567662 |
| C  | -3.7288567 | 3.7096601  | -2.5762726 |
| C  | -1.7950893 | 2.4716324  | -3.6082724 |
| C  | -5.1518394 | 2.7305442  | -0.9069997 |
| C  | -4.8708341 | 0.3626270  | -0.0912521 |
| H  | 2.0220724  | -4.6738477 | 4.1071972  |
| C  | 0.7584917  | -3.3282357 | 5.2029475  |
| H  | 0.3198070  | -4.3889447 | 0.7917780  |
| C  | 0.8330317  | -6.1928887 | 1.8360529  |
| C  | 2.3954082  | -4.2922218 | 1.2942749  |
| H  | -0.6238902 | -1.9064054 | 6.0213723  |
| H  | -2.4951224 | -1.1636743 | 2.8843334  |
| C  | -3.4743293 | -1.8905245 | 4.6529787  |
| C  | -1.8483576 | 0.0267890  | 4.5449965  |
| H  | -3.4345862 | 4.5678786  | -3.1755146 |
| C  | -4.8075651 | 3.8161416  | -1.7054225 |
| H  | -1.3864247 | 1.4574113  | -3.5569947 |

|   |            |            |            |
|---|------------|------------|------------|
| C | -0.7091661 | 3.4349686  | -3.1030992 |
| C | -2.1431650 | 2.7751511  | -5.0746808 |
| H | -5.9747092 | 2.8235045  | -0.2032474 |
| H | -4.0891870 | -0.3995977 | -0.1706253 |
| C | -6.2008969 | -0.2610903 | -0.5513487 |
| C | -4.9674404 | 0.7822000  | 1.3847270  |
| H | 1.3149949  | -3.4358468 | 6.1299396  |
| H | -0.1966028 | -6.5012897 | 2.0389670  |
| H | 1.1768822  | -6.7143567 | 0.9355365  |
| H | 1.4535566  | -6.5245258 | 2.6761501  |
| H | 2.4914385  | -3.2157447 | 1.1239500  |
| H | 3.0840295  | -4.5720123 | 2.0995310  |
| H | 2.7114359  | -4.8042429 | 0.3810998  |
| H | -4.2872370 | -1.1557275 | 4.6286962  |
| H | -3.8339286 | -2.8109909 | 4.1860686  |
| H | -3.2463333 | -2.1114779 | 5.7020487  |
| H | -2.6548410 | 0.7502319  | 4.3842976  |
| H | -1.6806241 | -0.0525447 | 5.6252003  |
| H | -0.9416312 | 0.4288066  | 4.0853755  |
| H | -5.3628063 | 4.7471423  | -1.6318476 |
| H | 0.1891933  | 3.3614922  | -3.7261733 |
| H | -1.0569788 | 4.4736463  | -3.1276196 |
| H | -0.4329104 | 3.1912504  | -2.0719579 |
| H | -1.2452973 | 2.7051342  | -5.6987776 |
| H | -2.8854701 | 2.0730004  | -5.4652290 |
| H | -2.5494035 | 3.7871180  | -5.1809119 |
| H | -6.4750060 | -1.0997881 | 0.0975953  |
| H | -7.0057961 | 0.4815043  | -0.5107106 |
| H | -6.1372124 | -0.6300367 | -1.5787315 |
| H | -5.1786621 | -0.0932340 | 2.0080389  |
| H | -4.0296287 | 1.2292556  | 1.7289117  |
| H | -5.7734740 | 1.5070586  | 1.5437389  |

## (2) Si<sub>3</sub>Ge<sub>3</sub>{N(SiMe<sub>3</sub>)Dipp}<sub>4</sub>

178

Energy = -10827.85056364 Hartree

|    |            |            |            |
|----|------------|------------|------------|
| Ge | 1.2427725  | -0.7051905 | 1.1079551  |
| Ge | 0.7506581  | 1.8062863  | -0.0317265 |
| Si | 1.0327069  | -0.1998503 | -1.3179961 |
| Si | 2.8793288  | 4.2174516  | 0.3458162  |
| Si | 2.6774895  | 0.1647987  | -3.9353373 |
| N  | 1.6532903  | 3.1316448  | 0.9812476  |
| N  | 2.2539164  | -0.7173997 | -2.4553273 |
| C  | 1.0003839  | 3.3710498  | 2.2393216  |
| C  | -0.1490158 | 4.1977626  | 2.3000976  |
| C  | -0.7516509 | 4.4216788  | 3.5424733  |
| H  | -1.6301894 | 5.0599366  | 3.5963279  |
| C  | -0.2537214 | 3.8406913  | 4.7026170  |
| H  | -0.7344343 | 4.0277701  | 5.6589784  |
| C  | 0.8516282  | 2.9987790  | 4.6273546  |
| H  | 1.2228432  | 2.5236991  | 5.5310739  |
| C  | 1.4862866  | 2.7359148  | 3.4098033  |
| C  | -0.7580404 | 4.8454643  | 1.0650036  |
| H  | -0.2010831 | 4.4886316  | 0.1926538  |
| C  | -0.6333582 | 6.3796664  | 1.1073349  |
| H  | 0.4093440  | 6.6984619  | 1.1921760  |
| H  | -1.0544299 | 6.8201627  | 0.1962338  |
| H  | -1.1796269 | 6.7886649  | 1.9647377  |
| C  | -2.2297199 | 4.4453596  | 0.8721095  |
| H  | -2.3372022 | 3.3594420  | 0.7874340  |
| H  | -2.8469992 | 4.7821371  | 1.7124242  |
| H  | -2.6279229 | 4.8934112  | -0.0430806 |
| C  | 2.6691705  | 1.7802000  | 3.3719621  |
| H  | 2.7911160  | 1.4644195  | 2.3300375  |
| C  | 3.9751569  | 2.4651415  | 3.8149517  |
| H  | 4.8069924  | 1.7517500  | 3.7825325  |
| H  | 4.2268263  | 3.3107267  | 3.1706075  |

|    |            |            |            |
|----|------------|------------|------------|
| H  | 3.8852101  | 2.8380487  | 4.8418451  |
| C  | 2.4327350  | 0.5236054  | 4.2254149  |
| H  | 3.2323284  | -0.2035782 | 4.0471868  |
| H  | 2.4308669  | 0.7587856  | 5.2960424  |
| H  | 1.4820610  | 0.0433261  | 3.9787047  |
| C  | 2.2881025  | 5.0311497  | -1.2473041 |
| H  | 3.0948481  | 5.6190045  | -1.7031357 |
| H  | 1.9651940  | 4.2919188  | -1.9877504 |
| H  | 1.4447438  | 5.7052923  | -1.0626908 |
| C  | 3.2399814  | 5.5648559  | 1.6047664  |
| H  | 4.0129405  | 6.2363618  | 1.2098609  |
| H  | 2.3502247  | 6.1661164  | 1.8151320  |
| H  | 3.5954281  | 5.1676483  | 2.5595514  |
| C  | 4.4301154  | 3.2254937  | -0.0284377 |
| H  | 5.1916406  | 3.8379083  | -0.5263301 |
| H  | 4.8674866  | 2.8116182  | 0.8859865  |
| H  | 4.1924307  | 2.3874250  | -0.6912527 |
| C  | 3.0055598  | -1.9188006 | -2.1448193 |
| C  | 2.5782540  | -3.1530493 | -2.6825595 |
| C  | 3.3656848  | -4.2892621 | -2.4735023 |
| H  | 3.0466998  | -5.2405553 | -2.8920984 |
| C  | 4.5452461  | -4.2211614 | -1.7395283 |
| H  | 5.1508523  | -5.1109986 | -1.5916499 |
| C  | 4.9321693  | -3.0098583 | -1.1772061 |
| H  | 5.8425355  | -2.9614007 | -0.5857405 |
| C  | 4.1767355  | -1.8457726 | -1.3580126 |
| C  | 1.2722505  | -3.2785241 | -3.4473807 |
| H  | 0.8909278  | -2.2651025 | -3.6018981 |
| C  | 0.2376913  | -4.0404880 | -2.6031665 |
| H  | -0.7219368 | -4.1005407 | -3.1288174 |
| H  | 0.5770772  | -5.0603288 | -2.3905925 |
| H  | 0.0750375  | -3.5306109 | -1.6470320 |
| C  | 1.4409093  | -3.9373732 | -4.8252471 |
| H  | 0.4822565  | -3.9493296 | -5.3558653 |
| H  | 2.1659235  | -3.3962263 | -5.4408430 |
| H  | 1.7846961  | -4.9734834 | -4.7335262 |
| C  | 4.6599608  | -0.5479071 | -0.7307502 |
| H  | 3.8589224  | 0.1904372  | -0.8466593 |
| C  | 5.9170227  | -0.0196223 | -1.4467068 |
| H  | 6.2452100  | 0.9231305  | -0.9964476 |
| H  | 6.7360293  | -0.7428362 | -1.3616987 |
| H  | 5.7334807  | 0.1536726  | -2.5104906 |
| C  | 4.9446901  | -0.7032556 | 0.7725268  |
| H  | 5.2093198  | 0.2676101  | 1.2040464  |
| H  | 4.0680942  | -1.0863036 | 1.3035541  |
| H  | 5.7812314  | -1.3880712 | 0.9503776  |
| C  | 4.0293459  | -0.7817009 | -4.8284369 |
| H  | 4.3487600  | -0.2119399 | -5.7102515 |
| H  | 4.9081337  | -0.9552989 | -4.2007791 |
| H  | 3.6748905  | -1.7590064 | -5.1706996 |
| C  | 3.2471249  | 1.8981037  | -3.4951111 |
| H  | 3.3865640  | 2.5068176  | -4.3968790 |
| H  | 2.4955603  | 2.3937914  | -2.8712206 |
| H  | 4.1899488  | 1.8962201  | -2.9403100 |
| C  | 1.1824748  | 0.3179300  | -5.0581405 |
| H  | 1.4077668  | 0.9804007  | -5.9031234 |
| H  | 0.8737970  | -0.6509159 | -5.4626190 |
| H  | 0.3281255  | 0.7430428  | -4.5226535 |
| Ge | -1.1752714 | 0.8055147  | 1.1259949  |
| Si | -0.7797558 | -1.7739087 | 0.4555345  |
| Si | -1.3312143 | -0.2138317 | -1.1497913 |
| N  | -1.4351458 | -2.9582297 | 1.5576828  |
| N  | -2.7086753 | 0.1375354  | -2.1685320 |
| Si | -2.7457095 | -4.1220926 | 1.2782673  |
| C  | -0.6591803 | -3.0820004 | 2.7826600  |
| Si | -3.3320843 | -0.9359465 | -3.4311713 |
| C  | -3.3637827 | 1.4164743  | -1.9631087 |
| C  | -2.3674940 | -5.1772816 | -0.2308727 |
| C  | -2.8861447 | -5.2506129 | 2.7712576  |

|   |            |            |            |
|---|------------|------------|------------|
| C | -4.3441316 | -3.1778620 | 1.0170348  |
| C | 0.4706190  | -3.9311211 | 2.8091793  |
| C | -1.0347882 | -2.3380441 | 3.9247279  |
| C | -4.7800723 | -0.0981506 | -4.2815771 |
| C | -3.8731748 | -2.5642353 | -2.6715783 |
| C | -1.9802554 | -1.3105836 | -4.6779456 |
| C | -2.9562084 | 2.5367606  | -2.7203332 |
| C | -4.4261452 | 1.5270248  | -1.0376680 |
| H | -3.2311003 | -5.8035327 | -0.4869214 |
| H | -2.1282014 | -4.5717447 | -1.1095692 |
| H | -1.5153979 | -5.8395338 | -0.0446368 |
| H | -3.7003682 | -5.9671572 | 2.6026358  |
| H | -1.9670566 | -5.8204779 | 2.9370788  |
| H | -3.1016412 | -4.7069206 | 3.6949070  |
| H | -5.1676063 | -3.8533732 | 0.7560625  |
| H | -4.6272211 | -2.6262302 | 1.9192902  |
| H | -4.2369113 | -2.4546502 | 0.2039876  |
| C | 1.1767714  | -4.0641111 | 4.0092459  |
| C | 0.9593480  | -4.6876726 | 1.5831682  |
| C | -0.2977199 | -2.5125800 | 5.1009531  |
| C | -2.1937291 | -1.3520074 | 3.9167088  |
| H | -5.1903151 | -0.7717238 | -5.0446617 |
| H | -5.5845665 | 0.1493140  | -3.5826581 |
| H | -4.4837049 | 0.8310042  | -4.7772041 |
| H | -4.1104803 | -3.2997102 | -3.4500136 |
| H | -3.0682613 | -2.9800873 | -2.0567946 |
| H | -4.7549590 | -2.4517564 | -2.0337971 |
| H | -2.3011685 | -2.0969894 | -5.3722816 |
| H | -1.7117608 | -0.4287568 | -5.2672410 |
| H | -1.0733447 | -1.6624651 | -4.1745553 |
| C | -3.6809971 | 3.7273545  | -2.6061938 |
| C | -1.7381210 | 2.4958127  | -3.6265739 |
| C | -5.1176636 | 2.7402806  | -0.9547191 |
| C | -4.8456429 | 0.3719296  | -0.1439486 |
| H | 2.0453235  | -4.7169687 | 4.0413977  |
| C | 0.7935479  | -3.3731550 | 5.1528390  |
| H | 0.3259156  | -4.4020830 | 0.7377127  |
| C | 0.8456220  | -6.2118374 | 1.7677348  |
| C | 2.4054332  | -4.3086956 | 1.2261711  |
| H | -0.5798663 | -1.9527201 | 5.9882502  |
| H | -2.4717029 | -1.1816910 | 2.8711923  |
| C | -3.4267297 | -1.9042335 | 4.6554174  |
| C | -1.7927870 | 0.0034049  | 4.5229641  |
| H | -3.3815684 | 4.5883834  | -3.1988348 |
| C | -4.7677788 | 3.8294882  | -1.7451564 |
| H | -1.3024096 | 1.4961363  | -3.5336932 |
| C | -0.6829399 | 3.5119495  | -3.1612858 |
| C | -2.0913490 | 2.7302920  | -5.1047144 |
| H | -5.9462700 | 2.8294253  | -0.2571453 |
| H | -4.0777722 | -0.4027883 | -0.2378140 |
| C | -6.1938893 | -0.2242893 | -0.5874875 |
| C | -4.9185078 | 0.7855720  | 1.3355366  |
| H | 1.3530067  | -3.4909430 | 6.0767751  |
| H | -0.1828103 | -6.5201996 | 1.9768807  |
| H | 1.1816238  | -6.7285307 | 0.8614735  |
| H | 1.4722764  | -6.5493779 | 2.6008669  |
| H | 2.4984661  | -3.2323170 | 1.0532222  |
| H | 3.0978729  | -4.5849146 | 2.0293115  |
| H | 2.7188069  | -4.8228852 | 0.3134060  |
| H | -4.2361753 | -1.1653518 | 4.6421493  |
| H | -3.7985477 | -2.8241398 | 4.1970601  |
| H | -3.1834298 | -2.1235427 | 5.7013871  |
| H | -2.5970309 | 0.7320280  | 4.3753431  |
| H | -1.6093938 | -0.0788870 | 5.6004107  |
| H | -0.8908843 | 0.4016667  | 4.0514991  |
| H | -5.3240443 | 4.7598678  | -1.6721491 |
| H | 0.2232530  | 3.4302422  | -3.7713228 |
| H | -1.0554779 | 4.5389287  | -3.2427959 |
| H | -0.4118731 | 3.3331051  | -2.1155761 |

|   |            |            |            |
|---|------------|------------|------------|
| H | -1.1888397 | 2.6789072  | -5.7239606 |
| H | -2.7994266 | 1.9819915  | -5.4719498 |
| H | -2.5429811 | 3.7184781  | -5.2462249 |
| H | -6.4691607 | -1.0668650 | 0.0561092  |
| H | -6.9858151 | 0.5302300  | -0.5203504 |
| H | -6.1578780 | -0.5799749 | -1.6207117 |
| H | -5.1366956 | -0.0891674 | 1.9574182  |
| H | -3.9707673 | 1.2173957  | 1.6713274  |
| H | -5.7116764 | 1.5221981  | 1.5050292  |

### (3) Si<sub>3</sub>Ge<sub>3</sub>{N(SiMe<sub>3</sub>)Dipp}<sub>4</sub>

178

Energy = -10827.79496294 Hartree

|    |            |            |            |
|----|------------|------------|------------|
| Si | 1.1582946  | -0.6600803 | 1.0628344  |
| Ge | 0.7514907  | 1.8013915  | -0.0292189 |
| Ge | 1.0579162  | -0.2224331 | -1.4130791 |
| Si | 2.8627007  | 4.1864409  | 0.3595724  |
| Si | 2.8062201  | 0.1735590  | -4.0479616 |
| N  | 1.6153932  | 3.1222671  | 0.9991873  |
| N  | 2.3804488  | -0.7750869 | -2.6306228 |
| C  | 0.9736764  | 3.3529963  | 2.2646314  |
| C  | -0.1759960 | 4.1776356  | 2.3359782  |
| C  | -0.7617939 | 4.4049858  | 3.5853290  |
| H  | -1.6411783 | 5.0410781  | 3.6489697  |
| C  | -0.2464486 | 3.8288924  | 4.7406667  |
| H  | -0.7141358 | 4.0189768  | 5.7028168  |
| C  | 0.8574615  | 2.9865498  | 4.6533582  |
| H  | 1.2406474  | 2.5133363  | 5.5531096  |
| C  | 1.4756069  | 2.7193724  | 3.4280958  |
| C  | -0.8050989 | 4.8126534  | 1.1046621  |
| H  | -0.2576359 | 4.4529765  | 0.2273834  |
| C  | -0.6886944 | 6.3475521  | 1.1316946  |
| H  | 0.3537501  | 6.6720161  | 1.1975818  |
| H  | -1.1261342 | 6.7777757  | 0.2234473  |
| H  | -1.2235961 | 6.7612473  | 1.9939456  |
| C  | -2.2760213 | 4.3979707  | 0.9367416  |
| H  | -2.3742935 | 3.3090803  | 0.8820394  |
| H  | -2.8863737 | 4.7505289  | 1.7756736  |
| H  | -2.6878773 | 4.8204189  | 0.0153325  |
| C  | 2.6554031  | 1.7604681  | 3.3778041  |
| H  | 2.7850432  | 1.4642363  | 2.3311427  |
| C  | 3.9587399  | 2.4326846  | 3.8474509  |
| H  | 4.7909077  | 1.7207074  | 3.8002209  |
| H  | 4.2142965  | 3.2969446  | 3.2292664  |
| H  | 3.8623768  | 2.7765469  | 4.8838219  |
| C  | 2.4037396  | 0.4867173  | 4.2008335  |
| H  | 3.2060362  | -0.2372601 | 4.0222836  |
| H  | 2.3807699  | 0.6998039  | 5.2758176  |
| H  | 1.4582844  | 0.0115682  | 3.9262175  |
| C  | 2.2779032  | 4.9655758  | -1.2518120 |
| H  | 3.0816227  | 5.5507150  | -1.7159690 |
| H  | 1.9659465  | 4.2066283  | -1.9775294 |
| H  | 1.4264415  | 5.6345236  | -1.0858807 |
| C  | 3.2171284  | 5.5455570  | 1.6057072  |
| H  | 4.0295214  | 6.1824758  | 1.2337341  |
| H  | 2.3406416  | 6.1807474  | 1.7664922  |
| H  | 3.5167704  | 5.1526277  | 2.5813643  |
| C  | 4.4063894  | 3.1737214  | 0.0135374  |
| H  | 5.1753816  | 3.7730979  | -0.4887785 |
| H  | 4.8349314  | 2.7722150  | 0.9374074  |
| H  | 4.1684471  | 2.3267293  | -0.6382988 |
| C  | 3.0901154  | -1.9758153 | -2.2789541 |
| C  | 2.6492138  | -3.2167450 | -2.7971041 |
| C  | 3.3847702  | -4.3701481 | -2.5101032 |
| H  | 3.0542084  | -5.3247351 | -2.9119163 |
| C  | 4.5283653  | -4.3169776 | -1.7196292 |
| H  | 5.0923971  | -5.2217725 | -1.5104824 |

|    |            |            |            |
|----|------------|------------|------------|
| C  | 4.9320814  | -3.1000004 | -1.1816399 |
| H  | 5.8139118  | -3.0618302 | -0.5474639 |
| C  | 4.2265243  | -1.9196563 | -1.4377519 |
| C  | 1.3774570  | -3.3262621 | -3.6209032 |
| H  | 1.0597020  | -2.3071949 | -3.8597798 |
| C  | 0.2637099  | -3.9836665 | -2.7863757 |
| H  | -0.6711073 | -4.0373348 | -3.3557428 |
| H  | 0.5454590  | -5.0005879 | -2.4914382 |
| H  | 0.0761251  | -3.4088291 | -1.8720923 |
| C  | 1.5807272  | -4.0810417 | -4.9438793 |
| H  | 0.6541302  | -4.0710770 | -5.5288716 |
| H  | 2.3719455  | -3.6232868 | -5.5456496 |
| H  | 1.8535408  | -5.1278647 | -4.7708573 |
| C  | 4.7178411  | -0.6165427 | -0.8297735 |
| H  | 3.9472061  | 0.1397777  | -1.0144676 |
| C  | 6.0209723  | -0.1499111 | -1.5045687 |
| H  | 6.3432753  | 0.8122144  | -1.0913577 |
| H  | 6.8210450  | -0.8796890 | -1.3360098 |
| H  | 5.8950942  | -0.0367742 | -2.5852231 |
| C  | 4.9184420  | -0.7249950 | 0.6907577  |
| H  | 5.2065309  | 0.2486693  | 1.1007464  |
| H  | 3.9973636  | -1.0460353 | 1.1870769  |
| H  | 5.7103654  | -1.4404192 | 0.9384129  |
| C  | 4.0828111  | -0.7857685 | -5.0343263 |
| H  | 4.4184753  | -0.1910106 | -5.8928514 |
| H  | 4.9618459  | -1.0379859 | -4.4327162 |
| H  | 3.6670583  | -1.7236852 | -5.4164987 |
| C  | 3.4723435  | 1.8563946  | -3.5386666 |
| H  | 3.6172312  | 2.5047104  | -4.4117781 |
| H  | 2.7595679  | 2.3552535  | -2.8718083 |
| H  | 4.4273682  | 1.7855681  | -3.0093701 |
| C  | 1.2729847  | 0.4782900  | -5.0908489 |
| H  | 1.4926614  | 1.1780678  | -5.9067440 |
| H  | 0.8885891  | -0.4465694 | -5.5322869 |
| H  | 0.4706915  | 0.9171369  | -4.4870062 |
| Si | -1.1354802 | 0.7829495  | 1.0584776  |
| Ge | -0.8091502 | -1.8428177 | 0.3912086  |
| Si | -1.3807067 | -0.1007880 | -1.1588448 |
| N  | -1.4959642 | -3.0243403 | 1.6811564  |
| N  | -2.7529071 | 0.2109883  | -2.1786984 |
| Si | -2.7737251 | -4.1945675 | 1.3717009  |
| C  | -0.6863447 | -3.0675710 | 2.8699016  |
| Si | -3.3132843 | -0.8890988 | -3.4518247 |
| C  | -3.4395412 | 1.4705724  | -1.9645742 |
| C  | -2.3558112 | -5.2296551 | -0.1451626 |
| C  | -2.9432166 | -5.3280251 | 2.8587094  |
| C  | -4.3729566 | -3.2618237 | 1.0565108  |
| C  | 0.4683710  | -3.8854752 | 2.9123467  |
| C  | -1.0334843 | -2.2547897 | 3.9765714  |
| C  | -4.7776857 | -0.1005864 | -4.3182756 |
| C  | -3.8031952 | -2.5308633 | -2.6869095 |
| C  | -1.9138015 | -1.1985272 | -4.6630156 |
| C  | -3.0511784 | 2.6058492  | -2.7090673 |
| C  | -4.4975263 | 1.5461777  | -1.0321179 |
| H  | -3.2011742 | -5.8702838 | -0.4255514 |
| H  | -2.1182766 | -4.6033186 | -1.0118375 |
| H  | -1.4914412 | -5.8761691 | 0.0410861  |
| H  | -3.7491398 | -6.0509928 | 2.6799543  |
| H  | -2.0224714 | -5.8906248 | 3.0414718  |
| H  | -3.1782855 | -4.7816757 | 3.7766608  |
| H  | -5.1823073 | -3.9376858 | 0.7551809  |
| H  | -4.6954601 | -2.7182627 | 1.9506002  |
| H  | -4.2362029 | -2.5296490 | 0.2543154  |
| C  | 1.2171717  | -3.9266175 | 4.0928048  |
| C  | 0.9384764  | -4.6965247 | 1.7144846  |
| C  | -0.2558700 | -2.3391522 | 5.1354760  |
| C  | -2.2144544 | -1.2971042 | 3.9327255  |
| H  | -5.1548409 | -0.7813661 | -5.0916869 |
| H  | -5.5986473 | 0.1113772  | -3.6264494 |

|   |            |            |            |
|---|------------|------------|------------|
| H | -4.5076358 | 0.8427202  | -4.8022852 |
| H | -4.0245755 | -3.2742910 | -3.4625077 |
| H | -2.9848527 | -2.9243775 | -2.0743660 |
| H | -4.6853622 | -2.4390845 | -2.0458785 |
| H | -2.1745850 | -1.9984401 | -5.3669858 |
| H | -1.6733294 | -0.3024406 | -5.2432033 |
| H | -1.0044230 | -1.5051897 | -4.1342130 |
| C | -3.7937979 | 3.7829205  | -2.5718086 |
| C | -1.8331620 | 2.5947779  | -3.6177043 |
| C | -5.2071584 | 2.7471590  | -0.9267590 |
| C | -4.8866650 | 0.3696823  | -0.1520086 |
| H | 2.1030784  | -4.5554692 | 4.1353644  |
| C | 0.8552399  | -3.1738898 | 5.2040334  |
| H | 0.2595970  | -4.4867038 | 0.8820211  |
| C | 0.8892206  | -6.2099923 | 1.9908862  |
| C | 2.3524163  | -4.2837762 | 1.2733304  |
| H | -0.5181323 | -1.7276116 | 5.9942354  |
| H | -2.4806623 | -1.1617387 | 2.8786589  |
| C | -3.4427536 | -1.8720879 | 4.6616912  |
| C | -1.8633943 | 0.0836804  | 4.5091735  |
| H | -3.5113765 | 4.6584446  | -3.1513597 |
| C | -4.8766512 | 3.8537131  | -1.7018739 |
| H | -1.3957803 | 1.5928682  | -3.5634523 |
| C | -0.7763702 | 3.5915889  | -3.1139191 |
| C | -2.1860323 | 2.8812450  | -5.0865551 |
| H | -6.0326150 | 2.8134965  | -0.2229331 |
| H | -4.1182769 | -0.3998527 | -0.2799133 |
| C | -6.2405920 | -0.2281344 | -0.5751049 |
| C | -4.9182914 | 0.7558545  | 1.3363499  |
| H | 1.4481268  | -3.2205071 | 6.1133830  |
| H | -0.1194247 | -6.5391865 | 2.2574789  |
| H | 1.2102313  | -6.7683357 | 1.1040145  |
| H | 1.5577597  | -6.4759611 | 2.8173588  |
| H | 2.3957831  | -3.2146176 | 1.0437485  |
| H | 3.0889224  | -4.4910334 | 2.0579205  |
| H | 2.6478439  | -4.8329400 | 0.3744460  |
| H | -4.2787952 | -1.1647766 | 4.6125098  |
| H | -3.7687694 | -2.8171100 | 4.2198087  |
| H | -3.2128924 | -2.0555292 | 5.7176531  |
| H | -2.6880468 | 0.7824298  | 4.3320651  |
| H | -1.6923997 | 0.0379078  | 5.5908898  |
| H | -0.9683160 | 0.4980084  | 4.0381372  |
| H | -5.4458085 | 4.7745924  | -1.6103215 |
| H | 0.1318984  | 3.5291502  | -3.7233915 |
| H | -1.1472095 | 4.6214772  | -3.1595114 |
| H | -0.5079613 | 3.3754209  | -2.0746266 |
| H | -1.2840281 | 2.8425992  | -5.7074871 |
| H | -2.9001611 | 2.1503100  | -5.4767803 |
| H | -2.6299079 | 3.8768686  | -5.1965396 |
| H | -6.4914668 | -1.0877688 | 0.0556480  |
| H | -7.0382692 | 0.5161637  | -0.4719760 |
| H | -6.2257594 | -0.5602572 | -1.6171238 |
| H | -5.1267524 | -0.1286121 | 1.9474687  |
| H | -3.9572725 | 1.1726160  | 1.6533597  |
| H | -5.6998701 | 1.4962890  | 1.5397377  |

#### (4) Si<sub>3</sub>Ge<sub>3</sub>{N(SiMe<sub>3</sub>)Dipp}<sub>4</sub>

178

Energy = -10827.79330323 Hartree

|    |           |            |            |
|----|-----------|------------|------------|
| Si | 1.1741811 | -0.6685401 | 1.0759504  |
| Ge | 0.7448373 | 1.8208444  | 0.0019559  |
| Ge | 1.0976732 | -0.2257935 | -1.3739728 |
| Si | 2.8542623 | 4.1951661  | 0.3815016  |
| Si | 2.7997210 | 0.1446675  | -4.0303947 |
| N  | 1.6308605 | 3.1187997  | 1.0433371  |
| N  | 2.4412210 | -0.7676109 | -2.5696136 |
| C  | 0.9952623 | 3.3362159  | 2.3132854  |



|   |            |            |            |
|---|------------|------------|------------|
| C | -0.1569258 | 4.1565090  | 2.3993596  |
| C | -0.7397091 | 4.3639365  | 3.6537404  |
| H | -1.6205260 | 4.9967899  | 3.7289829  |
| C | -0.2202270 | 3.7719437  | 4.7991267  |
| H | -0.6860461 | 3.9467370  | 5.7651039  |
| C | 0.8857000  | 2.9335142  | 4.6969186  |
| H | 1.2720228  | 2.4481201  | 5.5888071  |
| C | 1.5013917  | 2.6868474  | 3.4663655  |
| C | -0.7921611 | 4.8071510  | 1.1790205  |
| H | -0.2444814 | 4.4649383  | 0.2948531  |
| C | -0.6850523 | 6.3421900  | 1.2309152  |
| H | 0.3552675  | 6.6719391  | 1.3035553  |
| H | -1.1241221 | 6.7843018  | 0.3292506  |
| H | -1.2236582 | 6.7385885  | 2.0989896  |
| C | -2.2612708 | 4.3872898  | 1.0051575  |
| H | -2.3544233 | 3.2992306  | 0.9316931  |
| H | -2.8728848 | 4.7226372  | 1.8502846  |
| H | -2.6758867 | 4.8224644  | 0.0907912  |
| C | 2.6845693  | 1.7336688  | 3.3944827  |
| H | 2.7974826  | 1.4421383  | 2.3444083  |
| C | 3.9923312  | 2.4125388  | 3.8415051  |
| H | 4.8279836  | 1.7058424  | 3.7779748  |
| H | 4.2305117  | 3.2787640  | 3.2192162  |
| H | 3.9129293  | 2.7549597  | 4.8797900  |
| C | 2.4554490  | 0.4556867  | 4.2173832  |
| H | 3.2588636  | -0.2625772 | 4.0213162  |
| H | 2.4511587  | 0.6640767  | 5.2935151  |
| H | 1.5075322  | -0.0237099 | 3.9579283  |
| C | 2.2266584  | 4.9735118  | -1.2150514 |
| H | 3.0180945  | 5.5546853  | -1.7045855 |
| H | 1.8913443  | 4.2128808  | -1.9292059 |
| H | 1.3822321  | 5.6456688  | -1.0274921 |
| C | 3.2314366  | 5.5504447  | 1.6251475  |
| H | 4.0290114  | 6.1958320  | 1.2361893  |
| H | 2.3549098  | 6.1780613  | 1.8131470  |
| H | 3.5599640  | 5.1536695  | 2.5900339  |
| C | 4.3948318  | 3.1932706  | -0.0079374 |
| H | 5.1490731  | 3.7996558  | -0.5240108 |
| H | 4.8471531  | 2.7863405  | 0.9022234  |
| H | 4.1447252  | 2.3502665  | -0.6605693 |
| C | 3.1568631  | -1.9644940 | -2.2238285 |
| C | 2.7198250  | -3.2089477 | -2.7359708 |
| C | 3.4725611  | -4.3543529 | -2.4611336 |
| H | 3.1472761  | -5.3123145 | -2.8591969 |
| C | 4.6269447  | -4.2888804 | -1.6868430 |
| H | 5.2049109  | -5.1873502 | -1.4886853 |
| C | 5.0225520  | -3.0689610 | -1.1485754 |
| H | 5.9110302  | -3.0224938 | -0.5242155 |
| C | 4.2997321  | -1.8967903 | -1.3928183 |
| C | 1.4317586  | -3.3297189 | -3.5326276 |
| H | 1.0990574  | -2.3146698 | -3.7682769 |
| C | 0.3412574  | -3.9877875 | -2.6688360 |
| H | -0.6056113 | -4.0485140 | -3.2174706 |
| H | 0.6338751  | -5.0021425 | -2.3752647 |
| H | 0.1709902  | -3.4073318 | -1.7547847 |
| C | 1.6096786  | -4.0888596 | -4.8565457 |
| H | 0.6689450  | -4.0902483 | -5.4185303 |
| H | 2.3812224  | -3.6263573 | -5.4799222 |
| H | 1.8965689  | -5.1322911 | -4.6857452 |
| C | 4.7727165  | -0.5881705 | -0.7824491 |
| H | 3.9872146  | 0.1542435  | -0.9589195 |
| C | 6.0606705  | -0.0917201 | -1.4643590 |
| H | 6.3725565  | 0.8692134  | -1.0407821 |
| H | 6.8742495  | -0.8111506 | -1.3174052 |
| H | 5.9185556  | 0.0364259  | -2.5414468 |
| C | 4.9816791  | -0.7006080 | 0.7365368  |
| H | 5.2558446  | 0.2755307  | 1.1500924  |
| H | 4.0672405  | -1.0380062 | 1.2345956  |
| H | 5.7850785  | -1.4050351 | 0.9787047  |

|    |            |            |            |
|----|------------|------------|------------|
| C  | 4.1114893  | -0.7859000 | -4.9974820 |
| H  | 4.4052385  | -0.2085131 | -5.8828424 |
| H  | 5.0096244  | -0.9678296 | -4.3987258 |
| H  | 3.7416463  | -1.7586480 | -5.3374372 |
| C  | 3.3942020  | 1.8685301  | -3.5736129 |
| H  | 3.5046568  | 2.5006492  | -4.4633477 |
| H  | 2.6685051  | 2.3542424  | -2.9109180 |
| H  | 4.3565176  | 1.8477036  | -3.0523984 |
| C  | 1.2389485  | 0.3351842  | -5.0603976 |
| H  | 1.4058907  | 1.0212719  | -5.9000150 |
| H  | 0.8992618  | -0.6220812 | -5.4686342 |
| H  | 0.4219995  | 0.7457621  | -4.4562385 |
| Si | -1.1217538 | 0.7691812  | 1.0879947  |
| Si | -0.7744456 | -1.7686767 | 0.4969544  |
| Ge | -1.4178678 | -0.2049542 | -1.1876723 |
| N  | -1.4115255 | -2.9339941 | 1.6148597  |
| N  | -2.9280995 | 0.1546766  | -2.2474361 |
| Si | -2.7242997 | -4.0862316 | 1.2930427  |
| C  | -0.6468561 | -3.0437400 | 2.8459590  |
| Si | -3.4822484 | -0.9371747 | -3.5070447 |
| C  | -3.5222779 | 1.4460796  | -2.0325305 |
| C  | -2.3080692 | -5.0956312 | -0.2363523 |
| C  | -2.8908002 | -5.2341300 | 2.7667959  |
| C  | -4.3067630 | -3.1210644 | 1.0122436  |
| C  | 0.4924431  | -3.8793098 | 2.8845419  |
| C  | -1.0401588 | -2.2948597 | 3.9778501  |
| C  | -4.9185806 | -0.1318213 | -4.4083785 |
| C  | -4.0241220 | -2.5653821 | -2.7418620 |
| C  | -2.0727880 | -1.3081581 | -4.6959404 |
| C  | -3.0883436 | 2.5602154  | -2.7884660 |
| C  | -4.5462033 | 1.5966494  | -1.0673413 |
| H  | -3.1498775 | -5.7396806 | -0.5188011 |
| H  | -2.0801253 | -4.4551713 | -1.0941440 |
| H  | -1.4369264 | -5.7359992 | -0.0621440 |
| H  | -3.7106919 | -5.9404384 | 2.5844928  |
| H  | -1.9782919 | -5.8147083 | 2.9328171  |
| H  | -3.1081803 | -4.6973629 | 3.6943951  |
| H  | -5.1312485 | -3.7817915 | 0.7189364  |
| H  | -4.6059551 | -2.5804009 | 1.9159584  |
| H  | -4.1713054 | -2.3857023 | 0.2131583  |
| C  | 1.1864367  | -4.0006928 | 4.0926594  |
| C  | 1.0062894  | -4.6232672 | 1.6610737  |
| C  | -0.3142967 | -2.4574540 | 5.1627141  |
| C  | -2.2035818 | -1.3147733 | 3.9458837  |
| H  | -5.3016580 | -0.8109709 | -5.1802001 |
| H  | -5.7429509 | 0.1034859  | -3.7275325 |
| H  | -4.6230197 | 0.8015188  | -4.8969827 |
| H  | -4.2426470 | -3.3128197 | -3.5145444 |
| H  | -3.2294221 | -2.9712730 | -2.1064053 |
| H  | -4.9182595 | -2.4483630 | -2.1211503 |
| H  | -2.3480762 | -2.1052869 | -5.3977622 |
| H  | -1.7890297 | -0.4270414 | -5.2801612 |
| H  | -1.1830678 | -1.6424506 | -4.1488473 |
| C  | -3.7526428 | 3.7809175  | -2.6332161 |
| C  | -1.8958599 | 2.4785036  | -3.7265298 |
| C  | -5.1796997 | 2.8370271  | -0.9461876 |
| C  | -4.9722184 | 0.4456952  | -0.1725138 |
| H  | 2.0623099  | -4.6429454 | 4.1364961  |
| C  | 0.7830287  | -3.3094455 | 5.2296179  |
| H  | 0.3809153  | -4.3399144 | 0.8086926  |
| C  | 0.9063917  | -6.1496226 | 1.8331684  |
| C  | 2.4517728  | -4.2216226 | 1.3251634  |
| H  | -0.6094362 | -1.8945487 | 6.0439121  |
| H  | -2.4785628 | -1.1656324 | 2.8964075  |
| C  | -3.4356847 | -1.8606469 | 4.6904680  |
| C  | -1.8087494 | 0.0548582  | 4.5231528  |
| H  | -3.4334039 | 4.6368478  | -3.2231595 |
| C  | -4.8049089 | 3.9203348  | -1.7345227 |
| H  | -1.5276457 | 1.4482348  | -3.6933506 |

|   |            |            |            |
|---|------------|------------|------------|
| C | -0.7641641 | 3.3980347  | -3.2364792 |
| C | -2.2607265 | 2.8055703  | -5.1837703 |
| H | -5.9791097 | 2.9551168  | -0.2191795 |
| H | -4.2336331 | -0.3506131 | -0.3062664 |
| C | -6.3472663 | -0.1093994 | -0.5842090 |
| C | -4.9745107 | 0.8399911  | 1.3135170  |
| H | 1.3335889  | -3.4186143 | 6.1599110  |
| H | -0.1224634 | -6.4697383 | 2.0225993  |
| H | 1.2632516  | -6.6564412 | 0.9293793  |
| H | 1.5221748  | -6.4861141 | 2.6747721  |
| H | 2.5332642  | -3.1398119 | 1.1812430  |
| H | 3.1405737  | -4.5102051 | 2.1271391  |
| H | 2.7781475  | -4.7091313 | 0.4021748  |
| H | -4.2521829 | -1.1303950 | 4.6557542  |
| H | -3.7953316 | -2.7948042 | 4.2507905  |
| H | -3.1966850 | -2.0541971 | 5.7424649  |
| H | -2.6195777 | 0.7744348  | 4.3678485  |
| H | -1.6146711 | -0.0047896 | 5.6001923  |
| H | -0.9139242 | 0.4506108  | 4.0360184  |
| H | -5.3142611 | 4.8744777  | -1.6310659 |
| H | 0.1217118  | 3.2931873  | -3.8727263 |
| H | -1.0727294 | 4.4491564  | -3.2525042 |
| H | -0.4806406 | 3.1449297  | -2.2091904 |
| H | -1.3780585 | 2.7097373  | -5.8262146 |
| H | -3.0342455 | 2.1317291  | -5.5632938 |
| H | -2.6343993 | 3.8315693  | -5.2746266 |
| H | -6.6225272 | -0.9596581 | 0.0499037  |
| H | -7.1202526 | 0.6604361  | -0.4794905 |
| H | -6.3466439 | -0.4439438 | -1.6256505 |
| H | -5.2100718 | -0.0327871 | 1.9322072  |
| H | -3.9951059 | 1.2218947  | 1.6188113  |
| H | -5.7248744 | 1.6103850  | 1.5232608  |

### (1) Si<sub>4</sub>Ge<sub>2</sub>{N(SiMe<sub>3</sub>)Dipp}<sub>4</sub>

178

Energy = -12615.30772502 Hartree

|    |            |            |            |
|----|------------|------------|------------|
| Ge | 1.1377178  | 0.6772554  | 1.2334739  |
| Ge | 0.1746654  | -1.8897920 | 0.6585115  |
| Si | -1.2481933 | -0.0545674 | 1.2115967  |
| Si | 0.8914852  | -4.4145060 | 2.5588317  |
| Si | -3.6790875 | -0.7617490 | 3.0283875  |
| N  | 1.3312790  | -3.2140922 | 1.3506934  |
| N  | -2.3249988 | 0.2752109  | 2.5444639  |
| C  | 2.5438612  | -3.3178794 | 0.5833554  |
| C  | 2.5643845  | -4.0745156 | -0.6136523 |
| C  | 3.7621607  | -4.1672833 | -1.3298900 |
| H  | 3.7856174  | -4.7500892 | -2.2474375 |
| C  | 4.9151100  | -3.5243190 | -0.8953024 |
| H  | 5.8369580  | -3.6086506 | -1.4642815 |
| C  | 4.8751432  | -2.7527045 | 0.2618722  |
| H  | 5.7703894  | -2.2290014 | 0.5848714  |
| C  | 3.7017360  | -2.6209177 | 1.0105165  |
| C  | 1.3291515  | -4.7756906 | -1.1582675 |
| H  | 0.4930631  | -4.5434882 | -0.4914827 |
| C  | 1.5032875  | -6.3051804 | -1.1795533 |
| H  | 1.7233793  | -6.7003235 | -0.1836149 |
| H  | 0.5890486  | -6.7859667 | -1.5461039 |
| H  | 2.3258454  | -6.5936510 | -1.8435719 |
| C  | 0.9596880  | -4.2681693 | -2.5616586 |
| H  | 0.7720461  | -3.1897321 | -2.5555630 |
| H  | 1.7630206  | -4.4672693 | -3.2797557 |
| H  | 0.0526381  | -4.7640164 | -2.9195194 |
| C  | 3.6992557  | -1.7389218 | 2.2498926  |
| H  | 2.6522551  | -1.5143171 | 2.4819092  |
| C  | 4.3087696  | -2.4597173 | 3.4665318  |
| H  | 4.2957995  | -1.8010356 | 4.3428172  |
| H  | 3.7573528  | -3.3694422 | 3.7163319  |

|    |            |            |            |
|----|------------|------------|------------|
| H  | 5.3491898  | -2.7402117 | 3.2657395  |
| C  | 4.4302917  | -0.4064537 | 2.0200574  |
| H  | 4.2724097  | 0.2577891  | 2.8765417  |
| H  | 5.5108067  | -0.5538181 | 1.9090990  |
| H  | 4.0615676  | 0.1056964  | 1.1274739  |
| C  | -0.6854706 | -5.3147184 | 2.0597796  |
| H  | -1.0229101 | -5.9775907 | 2.8664506  |
| H  | -1.5032196 | -4.6195870 | 1.8446307  |
| H  | -0.5280188 | -5.9275644 | 1.1655956  |
| C  | 2.2735288  | -5.6780037 | 2.7092697  |
| H  | 2.0263457  | -6.3984158 | 3.4994132  |
| H  | 2.4058653  | -6.2363652 | 1.7774643  |
| H  | 3.2375737  | -5.2246993 | 2.9559112  |
| C  | 0.6004588  | -3.5401151 | 4.1955429  |
| H  | 0.2119085  | -4.2266846 | 4.9573522  |
| H  | 1.5244207  | -3.0932306 | 4.5766219  |
| H  | -0.1303055 | -2.7347817 | 4.0703246  |
| C  | -2.0491717 | 1.4653261  | 3.3279031  |
| C  | -2.6937424 | 2.6761380  | 2.9918709  |
| C  | -2.5148477 | 3.7870530  | 3.8220704  |
| H  | -3.0191963 | 4.7186099  | 3.5769777  |
| C  | -1.6991897 | 3.7209821  | 4.9464392  |
| H  | -1.5738405 | 4.5914984  | 5.5842810  |
| C  | -1.0220716 | 2.5404954  | 5.2324004  |
| H  | -0.3615345 | 2.4977255  | 6.0942645  |
| C  | -1.1730037 | 1.4009523  | 4.4346627  |
| C  | -3.5446565 | 2.8112571  | 1.7408401  |
| H  | -3.5529593 | 1.8333233  | 1.2503053  |
| C  | -2.9129110 | 3.8183359  | 0.7661130  |
| H  | -3.4907580 | 3.8685346  | -0.1633297 |
| H  | -2.8778209 | 4.8236664  | 1.2002075  |
| H  | -1.8878175 | 3.5223061  | 0.5188864  |
| C  | -4.9990289 | 3.2011093  | 2.0513942  |
| H  | -5.5816703 | 3.2602827  | 1.1252540  |
| H  | -5.4774183 | 2.4697678  | 2.7094444  |
| H  | -5.0476860 | 4.1786177  | 2.5437132  |
| C  | -0.4050599 | 0.1389277  | 4.7935521  |
| H  | -0.5312750 | -0.5663131 | 3.9649397  |
| C  | -0.9586996 | -0.5125297 | 6.0740064  |
| H  | -0.4040454 | -1.4280681 | 6.3061818  |
| H  | -0.8599007 | 0.1717490  | 6.9243041  |
| H  | -2.0166094 | -0.7692535 | 5.9726180  |
| C  | 1.1003717  | 0.4097446  | 4.9561802  |
| H  | 1.6332658  | -0.5323399 | 5.1222743  |
| H  | 1.5149567  | 0.8849396  | 4.0620741  |
| H  | 1.2964472  | 1.0617627  | 5.8145855  |
| C  | -4.5384917 | 0.0219598  | 4.5007231  |
| H  | -5.3495263 | -0.6351029 | 4.8393413  |
| H  | -3.8602512 | 0.1835533  | 5.3435915  |
| H  | -4.9762567 | 0.9917782  | 4.2452204  |
| C  | -3.0402509 | -2.4730928 | 3.4585106  |
| H  | -3.8693147 | -3.1722403 | 3.6230203  |
| H  | -2.4334942 | -2.8645973 | 2.6347501  |
| H  | -2.4174329 | -2.4708798 | 4.3578630  |
| C  | -4.8909956 | -0.9434044 | 1.6079339  |
| H  | -5.6553985 | -1.6924522 | 1.8493232  |
| H  | -5.4008590 | -0.0018932 | 1.3818774  |
| H  | -4.3804225 | -1.2729031 | 0.6969599  |
| Ge | 1.1079972  | -0.6648045 | -1.2617109 |
| Ge | 0.1406457  | 1.8937144  | -0.6605032 |
| Si | -1.2833193 | 0.0461594  | -1.1694543 |
| N  | 1.2688571  | 3.2204650  | -1.3941946 |
| N  | -2.3983506 | -0.2931319 | -2.4679037 |
| Si | 0.7808003  | 4.4205191  | -2.5840821 |
| C  | 2.5063100  | 3.3315047  | -0.6688774 |
| Si | -3.7767306 | 0.7322497  | -2.9064962 |
| C  | -2.1390881 | -1.4800214 | -3.2616346 |
| C  | -0.7833273 | 5.3104048  | -2.0292315 |
| C  | 2.1494072  | 5.6922931  | -2.7807355 |

|   |            |            |            |
|---|------------|------------|------------|
| C | 0.4376619  | 3.5477472  | -4.2115368 |
| C | 2.5626494  | 4.0848050  | 0.5292325  |
| C | 3.6543744  | 2.6462223  | -1.1391550 |
| C | -4.6730089 | -0.0554498 | -4.3544813 |
| C | -3.1684241 | 2.4510389  | -3.3508882 |
| C | -4.9460619 | 0.8977446  | -1.4489728 |
| C | -2.7663929 | -2.6951334 | -2.9087951 |
| C | -1.2980952 | -1.4081939 | -4.3948115 |
| H | -1.1492339 | 5.9765199  | -2.8207061 |
| H | -1.5907392 | 4.6099844  | -1.7929471 |
| H | -0.6004988 | 5.9183535  | -1.1366314 |
| H | 1.8679804  | 6.4152947  | -3.5569395 |
| H | 2.3152389  | 6.2466645  | -1.8519383 |
| H | 3.1055056  | 5.2455260  | -3.0669701 |
| H | 0.0196516  | 4.2338010  | -4.9580850 |
| H | 1.3498788  | 3.1058654  | -4.6253739 |
| H | -0.2845132 | 2.7386700  | -4.0626037 |
| C | 3.7847002  | 4.1873690  | 1.2018082  |
| C | 1.3415762  | 4.7739492  | 1.1195401  |
| C | 4.8528744  | 2.7876716  | -0.4332743 |
| C | 3.6149648  | 1.7657389  | -2.3790460 |
| H | -5.5001047 | 0.5947319  | -4.6665385 |
| H | -4.0188040 | -0.2081604 | -5.2177301 |
| H | -5.0935923 | -1.0301599 | -4.0889238 |
| H | -4.0094417 | 3.1416002  | -3.4889149 |
| H | -2.5414455 | 2.8473782  | -2.5447898 |
| H | -2.5728649 | 2.4571655  | -4.2684982 |
| H | -5.7247402 | 1.6400169  | -1.6642117 |
| H | -5.4395707 | -0.0494013 | -1.2106029 |
| H | -4.4108521 | 1.2292787  | -0.5530620 |
| C | -2.6080493 | -3.8028628 | -3.7472710 |
| C | -3.5754894 | -2.8380022 | -1.6312250 |
| C | -1.1661493 | -2.5449876 | -5.1998859 |
| C | -0.5488149 | -0.1410323 | -4.7744533 |
| H | 3.8358859  | 4.7680835  | 2.1194895  |
| C | 4.9273845  | 3.5571124  | 0.7236209  |
| H | 0.4822555  | 4.5279695  | 0.4879809  |
| C | 1.4977986  | 6.3056007  | 1.1253858  |
| C | 1.0339935  | 4.2711657  | 2.5393615  |
| H | 5.7408183  | 2.2734898  | -0.7899801 |
| H | 2.5621410  | 1.5333656  | -2.5741491 |
| C | 4.1758830  | 2.4917874  | -3.6157421 |
| C | 4.3639850  | 0.4387500  | -2.1767204 |
| H | -3.0995901 | -4.7377169 | -3.4890646 |
| C | -1.8281934 | -3.7296092 | -4.8963604 |
| H | -3.5771487 | -1.8601690 | -1.1404460 |
| C | -2.9023894 | -3.8387963 | -0.6777814 |
| C | -5.0353398 | -3.2417561 | -1.8942947 |
| H | -0.5330820 | -2.4965563 | -6.0818422 |
| H | -0.6529367 | 0.5618335  | -3.9407238 |
| C | -1.1460675 | 0.5098687  | -6.0354429 |
| C | 0.9522121  | -0.4031851 | -4.9845984 |
| H | 5.8684971  | 3.6494161  | 1.2588329  |
| H | 1.6714029  | 6.6976681  | 0.1191913  |
| H | 0.5939065  | 6.7776341  | 1.5272633  |
| H | 2.3439133  | 6.6072108  | 1.7530020  |
| H | 0.8630007  | 3.1900025  | 2.5475770  |
| H | 1.8605525  | 4.4878905  | 3.2252693  |
| H | 0.1334489  | 4.7557172  | 2.9278588  |
| H | 4.1375681  | 1.8332689  | -4.4914281 |
| H | 3.6089189  | 3.3970855  | -3.8457005 |
| H | 5.2204712  | 2.7804088  | -3.4513312 |
| H | 4.1815450  | -0.2256489 | -3.0281946 |
| H | 5.4464861  | 0.5947352  | -2.1034027 |
| H | 4.0308161  | -0.0774161 | -1.2725583 |
| H | -1.7184942 | -4.5977229 | -5.5403234 |
| H | -3.4494435 | -3.8952033 | 0.2697558  |
| H | -2.8709387 | -4.8434842 | -1.1136729 |
| H | -1.8729305 | -3.5323068 | -0.4634390 |

|   |            |            |            |
|---|------------|------------|------------|
| H | -5.5871306 | -3.3052304 | -0.9497267 |
| H | -5.5415234 | -2.5155797 | -2.5371325 |
| H | -5.0910286 | -4.2202600 | -2.3838675 |
| H | -0.6038693 | 1.4286926  | -6.2834060 |
| H | -1.0708520 | -0.1724667 | -6.8897150 |
| H | -2.2015259 | 0.7608768  | -5.8999166 |
| H | 1.4744080  | 0.5421496  | -5.1655011 |
| H | 1.3971432  | -0.8776477 | -4.1048003 |
| H | 1.1249555  | -1.0525669 | -5.8500018 |

## (2) Si<sub>4</sub>Ge<sub>2</sub>{N(SiMe<sub>3</sub>)Dipp}<sub>4</sub>

178

Energy = -12615.29988917 Hartree

|    |            |            |            |
|----|------------|------------|------------|
| Ge | 1.1802457  | 0.6754641  | 1.2354343  |
| Si | 0.3258235  | -1.8466020 | 0.6265110  |
| Ge | -1.2413440 | -0.1664255 | 1.2685051  |
| Si | 0.8445209  | -4.3086360 | 2.5038999  |
| Si | -3.7355745 | -0.8032938 | 3.1591838  |
| N  | 1.3279764  | -3.1097287 | 1.2882693  |
| N  | -2.3504066 | 0.1966332  | 2.7483070  |
| C  | 2.5844661  | -3.2747020 | 0.5779954  |
| C  | 2.6181656  | -4.0428189 | -0.6091277 |
| C  | 3.8468842  | -4.2150310 | -1.2551460 |
| H  | 3.8862085  | -4.8069586 | -2.1659499 |
| C  | 5.0106516  | -3.6381263 | -0.7598370 |
| H  | 5.9561472  | -3.7858615 | -1.2744104 |
| C  | 4.9536913  | -2.8513804 | 0.3858826  |
| H  | 5.8593215  | -2.3785866 | 0.7555078  |
| C  | 3.7502065  | -2.6417245 | 1.0672107  |
| C  | 1.3734686  | -4.6711383 | -1.2191293 |
| H  | 0.5109382  | -4.3549371 | -0.6236568 |
| C  | 1.4341128  | -6.2091370 | -1.1839697 |
| H  | 1.5480088  | -6.5876646 | -0.1641481 |
| H  | 0.5169508  | -6.6335855 | -1.6077354 |
| H  | 2.2810704  | -6.5765360 | -1.7742638 |
| C  | 1.1406089  | -4.1880670 | -2.6600858 |
| H  | 1.0687775  | -3.0969840 | -2.7027795 |
| H  | 1.9567666  | -4.5013300 | -3.3208143 |
| H  | 0.2063399  | -4.5999990 | -3.0520473 |
| C  | 3.7345848  | -1.7382305 | 2.2913875  |
| H  | 2.6874100  | -1.5039024 | 2.5102420  |
| C  | 4.3367385  | -2.4316957 | 3.5273184  |
| H  | 4.3200390  | -1.7520393 | 4.3870376  |
| H  | 3.7828874  | -3.3345490 | 3.7970626  |
| H  | 5.3778525  | -2.7183818 | 3.3398068  |
| C  | 4.4694474  | -0.4117925 | 2.0336126  |
| H  | 4.3193799  | 0.2684938  | 2.8787409  |
| H  | 5.5480335  | -0.5673227 | 1.9167857  |
| H  | 4.0957832  | 0.0841976  | 1.1336186  |
| C  | -0.7298968 | -5.1711153 | 1.9466330  |
| H  | -1.1254977 | -5.8119480 | 2.7442132  |
| H  | -1.5122099 | -4.4523365 | 1.6831328  |
| H  | -0.5493046 | -5.7986558 | 1.0675748  |
| C  | 2.2130705  | -5.5800889 | 2.6790539  |
| H  | 1.9316998  | -6.3100509 | 3.4487525  |
| H  | 2.3797731  | -6.1253087 | 1.7452572  |
| H  | 3.1683231  | -5.1349077 | 2.9701430  |
| C  | 0.5382903  | -3.4231017 | 4.1276681  |
| H  | 0.1590509  | -4.1111899 | 4.8926400  |
| H  | 1.4546363  | -2.9601591 | 4.5076105  |
| H  | -0.2056290 | -2.6314164 | 3.9957986  |
| C  | -2.0692829 | 1.4179446  | 3.4518790  |
| C  | -2.7222828 | 2.6155687  | 3.0776385  |
| C  | -2.5189144 | 3.7658045  | 3.8464740  |
| H  | -3.0305083 | 4.6850445  | 3.5710181  |
| C  | -1.6720878 | 3.7549153  | 4.9498106  |
| H  | -1.5316016 | 4.6550867  | 5.5419154  |

|    |            |            |            |
|----|------------|------------|------------|
| C  | -0.9829246 | 2.5898964  | 5.2714827  |
| H  | -0.2963717 | 2.5897451  | 6.1140510  |
| C  | -1.1542254 | 1.4159649  | 4.5317419  |
| C  | -3.5979045 | 2.6947785  | 1.8388868  |
| H  | -3.6556399 | 1.6863418  | 1.4178858  |
| C  | -2.9430799 | 3.6042752  | 0.7856062  |
| H  | -3.5444407 | 3.6298067  | -0.1302242 |
| H  | -2.8426407 | 4.6302996  | 1.1567472  |
| H  | -1.9436309 | 3.2354731  | 0.5303808  |
| C  | -5.0287982 | 3.1654681  | 2.1447968  |
| H  | -5.6294271 | 3.1693791  | 1.2282339  |
| H  | -5.5184396 | 2.5105485  | 2.8716071  |
| H  | -5.0318295 | 4.1821613  | 2.5531102  |
| C  | -0.3735934 | 0.1696380  | 4.9114258  |
| H  | -0.4989154 | -0.5453612 | 4.0922167  |
| C  | -0.9320782 | -0.4729653 | 6.1936146  |
| H  | -0.3789915 | -1.3869911 | 6.4368776  |
| H  | -0.8419592 | 0.2179684  | 7.0395924  |
| H  | -1.9890322 | -0.7307561 | 6.0825544  |
| C  | 1.1299847  | 0.4494535  | 5.0663631  |
| H  | 1.6668664  | -0.4861524 | 5.2567774  |
| H  | 1.5414844  | 0.9012721  | 4.1583821  |
| H  | 1.3288228  | 1.1244695  | 5.9061723  |
| C  | -4.6276786 | -0.0227668 | 4.6155771  |
| H  | -5.4776620 | -0.6510039 | 4.9100767  |
| H  | -3.9725421 | 0.0879544  | 5.4854161  |
| H  | -5.0129702 | 0.9715683  | 4.3696567  |
| C  | -3.1555618 | -2.5363397 | 3.5957677  |
| H  | -4.0056965 | -3.2152347 | 3.7364319  |
| H  | -2.5370939 | -2.9445130 | 2.7889753  |
| H  | -2.5565138 | -2.5493066 | 4.5118241  |
| C  | -4.8965503 | -0.9487233 | 1.6866582  |
| H  | -5.6724693 | -1.7019738 | 1.8720156  |
| H  | -5.3948609 | -0.0003959 | 1.4616185  |
| H  | -4.3473766 | -1.2542402 | 0.7886625  |
| Ge | 1.1487660  | -0.6654342 | -1.2683570 |
| Si | 0.2933026  | 1.8494770  | -0.6350868 |
| Ge | -1.2796320 | 0.1571637  | -1.2285689 |
| N  | 1.2659497  | 3.1174907  | -1.3306145 |
| N  | -2.4307037 | -0.2145456 | -2.6736360 |
| Si | 0.7331653  | 4.3128587  | -2.5289172 |
| C  | 2.5445647  | 3.2909784  | -0.6632386 |
| Si | -3.8371986 | 0.7740221  | -3.0374294 |
| C  | -2.1650421 | -1.4341584 | -3.3859315 |
| C  | -0.8270074 | 5.1648991  | -1.9178598 |
| C  | 2.0860053  | 5.5936119  | -2.7515672 |
| C  | 0.3769173  | 3.4245185  | -4.1408908 |
| C  | 2.6131702  | 4.0591621  | 0.5223286  |
| C  | 3.6975612  | 2.6669342  | -1.1924158 |
| C  | -4.7672913 | -0.0100602 | -4.4678264 |
| C  | -3.2860768 | 2.5132612  | -3.4865247 |
| C  | -4.9522691 | 0.9052069  | -1.5285575 |
| C  | -2.7991307 | -2.6355436 | -2.9917330 |
| C  | -1.2856332 | -1.4264063 | -4.4949492 |
| H  | -1.2549487 | 5.8016985  | -2.7018688 |
| H  | -1.5945923 | 4.4410088  | -1.6262756 |
| H  | -0.6203124 | 5.7950123  | -1.0464318 |
| H  | 1.7705142  | 6.3249082  | -3.5066175 |
| H  | 2.2855428  | 6.1360751  | -1.8225994 |
| H  | 3.0319924  | 5.1557604  | -3.0813657 |
| H  | -0.0330042 | 4.1097204  | -4.8925398 |
| H  | 1.2825285  | 2.9672814  | -4.5521397 |
| H  | -0.3568084 | 2.6280971  | -3.9831058 |
| C  | 3.8619788  | 4.2405913  | 1.1259122  |
| C  | 1.3855713  | 4.6788644  | 1.1744233  |
| C  | 4.9220834  | 2.8855607  | -0.5526694 |
| C  | 3.6467200  | 1.7636588  | -2.4158225 |
| H  | -5.6312436 | 0.6116751  | -4.7341795 |
| H  | -4.1380677 | -0.1126100 | -5.3575373 |

|   |            |            |            |
|---|------------|------------|------------|
| H | -5.1363289 | -1.0084167 | -4.2134351 |
| H | -4.1460934 | 3.1851594  | -3.5976462 |
| H | -2.6455215 | 2.9243549  | -2.6987275 |
| H | -2.7169627 | 2.5340462  | -4.4213025 |
| H | -5.7396181 | 1.6528076  | -1.6865764 |
| H | -5.4356203 | -0.0477919 | -1.2911143 |
| H | -4.3771355 | 1.2120762  | -0.6474755 |
| C | -2.6162240 | -3.7835832 | -3.7688998 |
| C | -3.6315706 | -2.7207509 | -1.7240217 |
| C | -1.1336023 | -2.5983848 | -5.2420126 |
| C | -0.5230049 | -0.1760201 | -4.8971695 |
| H | 3.9280437  | 4.8328766  | 2.0349077  |
| C | 5.0123873  | 3.6725901  | 0.5907258  |
| H | 0.5051238  | 4.3541566  | 0.6104632  |
| C | 1.4323834  | 6.2172321  | 1.1333956  |
| C | 1.2075042  | 4.1979102  | 2.6238548  |
| H | 5.8180494  | 2.4197378  | -0.9533677 |
| H | 2.5945185  | 1.5209619  | -2.5982748 |
| C | 4.1999195  | 2.4620443  | -3.6716512 |
| C | 4.4008687  | 0.4431615  | -2.1845967 |
| H | -3.1139931 | -4.7056754 | -3.4780877 |
| C | -1.8068474 | -3.7669136 | -4.8999704 |
| H | -3.6788830 | -1.7133683 | -1.2991825 |
| C | -2.9372895 | -3.6294019 | -0.6955248 |
| C | -5.0702528 | -3.1965277 | -1.9815415 |
| H | -0.4752766 | -2.5938149 | -6.1068189 |
| H | -0.6249104 | 0.5369157  | -4.0729654 |
| C | -1.1251687 | 0.4665864  | -6.1593803 |
| C | 0.9759795  | -0.4492151 | -5.1006522 |
| H | 5.9738654  | 3.8274907  | 1.0725304  |
| H | 1.5066628  | 6.5939147  | 0.1092537  |
| H | 0.5275222  | 6.6354566  | 1.5886626  |
| H | 2.2969366  | 6.5929530  | 1.6920958  |
| H | 1.1473479  | 3.1063378  | 2.6718630  |
| H | 2.0431281  | 4.5206623  | 3.2550009  |
| H | 0.2835773  | 4.6024464  | 3.0469384  |
| H | 4.1592249  | 1.7821720  | -4.5304083 |
| H | 3.6294410  | 3.3600655  | -3.9218663 |
| H | 5.2444701  | 2.7574732  | -3.5202490 |
| H | 4.2272292  | -0.2378903 | -3.0245886 |
| H | 5.4815216  | 0.6075836  | -2.1051626 |
| H | 4.0627351  | -0.0563960 | -1.2726019 |
| H | -1.6822508 | -4.6653933 | -5.4981601 |
| H | -3.5067404 | -3.6588638 | 0.2403352  |
| H | -2.8455757 | -4.6543840 | -1.0717620 |
| H | -1.9312096 | -3.2569361 | -0.4739424 |
| H | -5.6390462 | -3.2045128 | -1.0448716 |
| H | -5.5870992 | -2.5420874 | -2.6897080 |
| H | -5.0833858 | -4.2124388 | -2.3915813 |
| H | -0.5838369 | 1.3831716  | -6.4188507 |
| H | -1.0600015 | -0.2225927 | -7.0090770 |
| H | -2.1788981 | 0.7201306  | -6.0134441 |
| H | 1.5023924  | 0.4889665  | -5.3070344 |
| H | 1.4183381  | -0.9002153 | -4.2068652 |
| H | 1.1507168  | -1.1224328 | -5.9472430 |

### (3) Si<sub>4</sub>Ge<sub>2</sub>{N(SiMe<sub>3</sub>)Dipp}<sub>4</sub>

178

Energy = -12615.24965525 Hartree

|    |            |            |           |
|----|------------|------------|-----------|
| Si | 1.1353708  | 0.6605860  | 1.1414828 |
| Ge | 0.2087097  | -1.8918935 | 0.6796014 |
| Ge | -1.2719964 | 0.0000438  | 1.2919142 |
| Si | 0.8946829  | -4.3901764 | 2.5498781 |
| Si | -3.7408078 | -0.7351255 | 3.1488134 |
| N  | 1.3850948  | -3.1931344 | 1.3556705 |
| N  | -2.4130512 | 0.3436560  | 2.7406027 |
| C  | 2.6022123  | -3.2895295 | 0.5971609 |



|   |            |            |            |
|---|------------|------------|------------|
| C | 2.6313433  | -4.0381729 | -0.6048726 |
| C | 3.8361944  | -4.1265587 | -1.3093497 |
| H | 3.8686743  | -4.7030306 | -2.2305524 |
| C | 4.9844275  | -3.4844517 | -0.8603162 |
| H | 5.9115084  | -3.5653947 | -1.4211850 |
| C | 4.9329365  | -2.7156817 | 0.2984894  |
| H | 5.8238677  | -2.1902343 | 0.6305167  |
| C | 3.7526000  | -2.5895327 | 1.0368650  |
| C | 1.3970300  | -4.7242395 | -1.1710504 |
| H | 0.5531318  | -4.4876496 | -0.5153197 |
| C | 1.5538609  | -6.2553313 | -1.2001196 |
| H | 1.7478937  | -6.6607265 | -0.2028505 |
| H | 0.6423296  | -6.7226384 | -1.5899460 |
| H | 2.3871133  | -6.5479066 | -1.8488231 |
| C | 1.0525225  | -4.2019325 | -2.5759251 |
| H | 0.9081193  | -3.1169605 | -2.5687596 |
| H | 1.8506338  | -4.4311536 | -3.2909855 |
| H | 0.1283994  | -4.6620313 | -2.9382964 |
| C | 3.7300771  | -1.7115526 | 2.2785430  |
| H | 2.6791199  | -1.4940283 | 2.4992745  |
| C | 4.3282720  | -2.4377669 | 3.4974519  |
| H | 4.2902311  | -1.7911957 | 4.3818889  |
| H | 3.7849086  | -3.3587018 | 3.7242360  |
| H | 5.3757496  | -2.7018567 | 3.3118029  |
| C | 4.4523911  | -0.3725162 | 2.0618734  |
| H | 4.2884194  | 0.2827906  | 2.9239766  |
| H | 5.5340507  | -0.5104764 | 1.9501565  |
| H | 4.0800064  | 0.1448989  | 1.1736204  |
| C | -0.7054771 | -5.2167104 | 1.9978871  |
| H | -1.1196308 | -5.8461005 | 2.7952428  |
| H | -1.4692412 | -4.4758142 | 1.7349928  |
| H | -0.5446757 | -5.8494014 | 1.1181530  |
| C | 2.2422405  | -5.6864065 | 2.7160692  |
| H | 1.9427429  | -6.4361792 | 3.4591646  |
| H | 2.4197626  | -6.2049400 | 1.7689971  |
| H | 3.1962434  | -5.2577289 | 3.0367292  |
| C | 0.5959383  | -3.5192438 | 4.1866021  |
| H | 0.1838022  | -4.2040032 | 4.9376189  |
| H | 1.5225794  | -3.0927805 | 4.5842009  |
| H | -0.1190646 | -2.6999620 | 4.0581615  |
| C | -2.1015234 | 1.5180299  | 3.5094880  |
| C | -2.7536924 | 2.7379544  | 3.2107370  |
| C | -2.4890749 | 3.8566300  | 4.0059859  |
| H | -2.9919909 | 4.7951508  | 3.7866644  |
| C | -1.5906973 | 3.7913560  | 5.0663726  |
| H | -1.3990860 | 4.6698833  | 5.6762601  |
| C | -0.9241299 | 2.5991182  | 5.3269982  |
| H | -0.2081230 | 2.5533179  | 6.1433294  |
| C | -1.1560079 | 1.4530154  | 4.5596934  |
| C | -3.6909557 | 2.8693395  | 2.0218123  |
| H | -3.8908543 | 1.8596152  | 1.6515108  |
| C | -2.9998169 | 3.6550471  | 0.8924142  |
| H | -3.6514153 | 3.7316729  | 0.0147108  |
| H | -2.7459336 | 4.6686089  | 1.2222861  |
| H | -2.0712684 | 3.1588605  | 0.5871251  |
| C | -5.0363299 | 3.5177853  | 2.3836093  |
| H | -5.6998254 | 3.5173323  | 1.5116354  |
| H | -5.5342931 | 2.9778977  | 3.1948609  |
| H | -4.9074487 | 4.5580130  | 2.7022822  |
| C | -0.4120355 | 0.1711764  | 4.8931469  |
| H | -0.6122160 | -0.5405012 | 4.0851296  |
| C | -0.9332144 | -0.4402406 | 6.2066398  |
| H | -0.4313669 | -1.3922055 | 6.4126436  |
| H | -0.7413729 | 0.2366468  | 7.0469097  |
| H | -2.0114587 | -0.6205068 | 6.1627543  |
| C | 1.1086384  | 0.3837338  | 4.9670890  |
| H | 1.6126979  | -0.5726683 | 5.1415903  |
| H | 1.4913887  | 0.8069987  | 4.0331804  |
| H | 1.3781822  | 1.0588424  | 5.7868392  |

|    |            |            |            |
|----|------------|------------|------------|
| C  | -4.7222169 | 0.0467953  | 4.5437994  |
| H  | -5.5272771 | -0.6269432 | 4.8620932  |
| H  | -4.0922783 | 0.2562489  | 5.4145596  |
| H  | -5.1776401 | 0.9924213  | 4.2327911  |
| C  | -3.0819205 | -2.4194210 | 3.6605856  |
| H  | -3.9013697 | -3.1331085 | 3.8120396  |
| H  | -2.4323046 | -2.8254585 | 2.8767148  |
| H  | -2.4987751 | -2.3745490 | 4.5855588  |
| C  | -4.8195638 | -0.9892940 | 1.6308774  |
| H  | -5.5575023 | -1.7828678 | 1.8020141  |
| H  | -5.3601572 | -0.0768264 | 1.3599482  |
| H  | -4.2121858 | -1.2839133 | 0.7669233  |
| Si | 1.1030596  | -0.6528364 | -1.1782022 |
| Ge | 0.1734496  | 1.8927702  | -0.6870730 |
| Ge | -1.3129548 | -0.0097072 | -1.2511789 |
| N  | 1.3193449  | 3.2004758  | -1.4019444 |
| N  | -2.4978869 | -0.3619497 | -2.6621243 |
| Si | 0.7830510  | 4.3953347  | -2.5785653 |
| C  | 2.5598378  | 3.3053403  | -0.6834785 |
| Si | -3.8464587 | 0.7066215  | -3.0270825 |
| C  | -2.2028775 | -1.5337858 | -3.4413949 |
| C  | -0.8019665 | 5.2143767  | -1.9740948 |
| C  | 2.1178839  | 5.6982003  | -2.7893583 |
| C  | 0.4338696  | 3.5232242  | -4.2046332 |
| C  | 2.6226119  | 4.0533850  | 0.5176757  |
| C  | 3.7006011  | 2.6148750  | -1.1615102 |
| C  | -4.8656457 | -0.0832302 | -4.3900816 |
| C  | -3.2180299 | 2.3963156  | -3.5591623 |
| C  | -4.8782911 | 0.9532957  | -1.4756229 |
| C  | -2.8385026 | -2.7578075 | -3.1242478 |
| C  | -1.2903571 | -1.4621923 | -4.5199713 |
| H  | -1.2424281 | 5.8446492  | -2.7565509 |
| H  | -1.5550720 | 4.4702858  | -1.6903899 |
| H  | -0.6163068 | 5.8450529  | -1.0978945 |
| H  | 1.7856439  | 6.4525435  | -3.5136662 |
| H  | 2.3322340  | 6.2099645  | -1.8462054 |
| H  | 3.0595241  | 5.2757700  | -3.1520056 |
| H  | -0.0047559 | 4.2065257  | -4.9418589 |
| H  | 1.3484565  | 3.0996815  | -4.6321965 |
| H  | -0.2738970 | 2.7016013  | -4.0529759 |
| C  | 3.8496760  | 4.1522486  | 1.1812366  |
| C  | 1.4018814  | 4.7281403  | 1.1254174  |
| C  | 4.9039545  | 2.7511570  | -0.4631796 |
| C  | 3.6437201  | 1.7356932  | -2.4012453 |
| H  | -5.6848796 | 0.5846304  | -4.6836208 |
| H  | -4.2617071 | -0.2893097 | -5.2798625 |
| H  | -5.3046679 | -1.0316346 | -4.0642455 |
| H  | -4.0480455 | 3.1027093  | -3.6851446 |
| H  | -2.5480551 | 2.8083425  | -2.7958522 |
| H  | -2.6635235 | 2.3562882  | -4.5018038 |
| H  | -5.6284114 | 1.7399183  | -1.6244159 |
| H  | -5.4017520 | 0.0365950  | -1.1860145 |
| H  | -4.2462292 | 1.2550285  | -0.6321221 |
| C  | -2.5913968 | -3.8743161 | -3.9280979 |
| C  | -3.7380001 | -2.8954815 | -1.9072392 |
| C  | -1.0748473 | -2.6064236 | -5.2948750 |
| C  | -0.5655643 | -0.1753489 | -4.8757030 |
| H  | 3.9080847  | 4.7286894  | 2.1011256  |
| C  | 4.9877780  | 3.5205259  | 0.6933315  |
| H  | 0.5377955  | 4.4805032  | 0.5007342  |
| C  | 1.5431567  | 6.2609332  | 1.1441406  |
| C  | 1.1127066  | 4.2069582  | 2.5430563  |
| H  | 5.7876810  | 2.2333291  | -0.8250950 |
| H  | 2.5876154  | 1.5109944  | -2.5876443 |
| C  | 4.1974487  | 2.4641803  | -3.6396187 |
| C  | 4.3814964  | 0.4016761  | -2.2066371 |
| H  | -3.0818096 | -4.8159792 | -3.6945233 |
| C  | -1.7258540 | -3.8028797 | -5.0151041 |
| H  | -3.9370310 | -1.8868773 | -1.5334542 |

|   |            |            |            |
|---|------------|------------|------------|
| C | -3.0041587 | -3.6706427 | -0.7976559 |
| C | -5.0869238 | -3.5589059 | -2.2258068 |
| H | -0.3843938 | -2.5556783 | -6.1326443 |
| H | -0.7439224 | 0.5344012  | -4.0608691 |
| C | -1.1331588 | 0.4337559  | -6.1709389 |
| C | 0.9531935  | -0.3781341 | -4.9992694 |
| H | 5.9325406  | 3.6097532  | 1.2225524  |
| H | 1.6966097  | 6.6649395  | 0.1393119  |
| H | 0.6413376  | 6.7198466  | 1.5652828  |
| H | 2.3961666  | 6.5644390  | 1.7613996  |
| H | 0.9805649  | 3.1203893  | 2.5441813  |
| H | 1.9323985  | 4.4477288  | 3.2292963  |
| H | 0.1964774  | 4.6577881  | 2.9358372  |
| H | 4.1353865  | 1.8160722  | -4.5215712 |
| H | 3.6408003  | 3.3810112  | -3.8499270 |
| H | 5.2485642  | 2.7355814  | -3.4881554 |
| H | 4.1943140  | -0.2557172 | -3.0624134 |
| H | 5.4652190  | 0.5470378  | -2.1298422 |
| H | 4.0413004  | -0.1171901 | -1.3064016 |
| H | -1.5474318 | -4.6798299 | -5.6312228 |
| H | -3.6276567 | -3.7521290 | 0.0998066  |
| H | -2.7494171 | -4.6821751 | -1.1330258 |
| H | -2.0721309 | -3.1636744 | -0.5220914 |
| H | -5.7236608 | -3.5615295 | -1.3341093 |
| H | -5.6146529 | -3.0273787 | -3.0236606 |
| H | -4.9573645 | -4.5991501 | -2.5441375 |
| H | -0.6444092 | 1.3890405  | -6.3924126 |
| H | -0.9645674 | -0.2413737 | -7.0175819 |
| H | -2.2105246 | 0.6070293  | -6.0916911 |
| H | 1.4452595  | 0.5817163  | -5.1884962 |
| H | 1.3687209  | -0.8002752 | -4.0789505 |
| H | 1.2003156  | -1.0503211 | -5.8284217 |

#### (4) Si<sub>4</sub>Ge<sub>2</sub>{N(SiMe<sub>3</sub>)Dipp}<sub>4</sub>

178

Energy = -12615.30377130 Hartree

|    |            |            |            |
|----|------------|------------|------------|
| Ge | 1.1644756  | 0.6831048  | 1.2458231  |
| Ge | 0.2093686  | -1.9035468 | 0.6571625  |
| Si | -1.1988709 | -0.0483122 | 1.2465862  |
| Si | 0.9067860  | -4.4169143 | 2.5584247  |
| Si | -3.6597828 | -0.7437161 | 3.0073891  |
| N  | 1.3804166  | -3.2021545 | 1.3799991  |
| N  | -2.2684676 | 0.2736911  | 2.5835732  |
| C  | 2.5928290  | -3.2990287 | 0.6136128  |
| C  | 2.6182079  | -4.0475622 | -0.5891292 |
| C  | 3.8170696  | -4.1269955 | -1.3055101 |
| H  | 3.8450689  | -4.7043619 | -2.2263567 |
| C  | 4.9648035  | -3.4767537 | -0.8679522 |
| H  | 5.8871003  | -3.5508112 | -1.4376953 |
| C  | 4.9189419  | -2.7104192 | 0.2928140  |
| H  | 5.8097997  | -2.1802389 | 0.6173422  |
| C  | 3.7449118  | -2.5933635 | 1.0424729  |
| C  | 1.3878604  | -4.7535608 | -1.1397492 |
| H  | 0.5454896  | -4.5184960 | -0.4814855 |
| C  | 1.5646350  | -6.2830400 | -1.1501512 |
| H  | 1.7728849  | -6.6730058 | -0.1497035 |
| H  | 0.6560154  | -6.7674293 | -1.5257693 |
| H  | 2.3961303  | -6.5726988 | -1.8024968 |
| C  | 1.0262126  | -4.2571921 | -2.5493320 |
| H  | 0.8485196  | -3.1773099 | -2.5553319 |
| H  | 1.8281966  | -4.4722317 | -3.2644506 |
| H  | 0.1143510  | -4.7474256 | -2.9029779 |
| C  | 3.7296819  | -1.7191496 | 2.2870104  |
| H  | 2.6800260  | -1.4915644 | 2.5039025  |
| C  | 4.3137655  | -2.4537337 | 3.5076345  |
| H  | 4.2891753  | -1.8033994 | 4.3899245  |
| H  | 3.7511181  | -3.3616556 | 3.7377894  |

|    |            |            |            |
|----|------------|------------|------------|
| H  | 5.3556249  | -2.7397842 | 3.3228068  |
| C  | 4.4707570  | -0.3886694 | 2.0800353  |
| H  | 4.3044194  | 0.2674347  | 2.9412552  |
| H  | 5.5520098  | -0.5398384 | 1.9824276  |
| H  | 4.1160385  | 0.1339847  | 1.1873740  |
| C  | -0.6628649 | -5.2989370 | 2.0024316  |
| H  | -1.0574911 | -5.9349064 | 2.8047294  |
| H  | -1.4517940 | -4.5901661 | 1.7287198  |
| H  | -0.4755044 | -5.9356128 | 1.1310081  |
| C  | 2.2796371  | -5.6867660 | 2.7371451  |
| H  | 1.9685978  | -6.4645714 | 3.4461036  |
| H  | 2.5022737  | -6.1733031 | 1.7825835  |
| H  | 3.2127686  | -5.2509450 | 3.1051121  |
| C  | 0.5719620  | -3.5618803 | 4.1969059  |
| H  | 0.1760053  | -4.2597312 | 4.9445249  |
| H  | 1.4832661  | -3.1082610 | 4.6002682  |
| H  | -0.1653793 | -2.7636600 | 4.0644883  |
| C  | -2.0010675 | 1.4558011  | 3.3798482  |
| C  | -2.6607879 | 2.6638294  | 3.0640488  |
| C  | -2.4779073 | 3.7682593  | 3.9020845  |
| H  | -2.9900783 | 4.6992503  | 3.6718875  |
| C  | -1.6499123 | 3.6958429  | 5.0174161  |
| H  | -1.5229763 | 4.5610810  | 5.6621405  |
| C  | -0.9655939 | 2.5156544  | 5.2875171  |
| H  | -0.2992376 | 2.4673607  | 6.1445814  |
| C  | -1.1172147 | 1.3836369  | 4.4794036  |
| C  | -3.5255284 | 2.8031870  | 1.8225941  |
| H  | -3.5969848 | 1.8131869  | 1.3624976  |
| C  | -2.8476086 | 3.7373116  | 0.8069527  |
| H  | -3.4435160 | 3.8069896  | -0.1099077 |
| H  | -2.7291702 | 4.7468929  | 1.2160393  |
| H  | -1.8544479 | 3.3582491  | 0.5429081  |
| C  | -4.9504654 | 3.2871764  | 2.1353515  |
| H  | -5.5446963 | 3.3272113  | 1.2157031  |
| H  | -5.4551363 | 2.6187764  | 2.8394456  |
| H  | -4.9417465 | 4.2914244  | 2.5730011  |
| C  | -0.3502611 | 0.1169777  | 4.8226344  |
| H  | -0.4732238 | -0.5765639 | 3.9838944  |
| C  | -0.9162445 | -0.5516880 | 6.0887492  |
| H  | -0.3664191 | -1.4719517 | 6.3129644  |
| H  | -0.8250368 | 0.1203950  | 6.9495584  |
| H  | -1.9738539 | -0.8040314 | 5.9720002  |
| C  | 1.1545471  | 0.3817622  | 4.9957208  |
| H  | 1.6834387  | -0.5632737 | 5.1575760  |
| H  | 1.5752508  | 0.8614094  | 4.1067132  |
| H  | 1.3493764  | 1.0269755  | 5.8594997  |
| C  | -4.5263362 | 0.0186354  | 4.4861333  |
| H  | -5.3651474 | -0.6220928 | 4.7861120  |
| H  | -3.8603132 | 0.1285600  | 5.3471632  |
| H  | -4.9266259 | 1.0104191  | 4.2548659  |
| C  | -3.0658053 | -2.4781090 | 3.4069597  |
| H  | -3.9129268 | -3.1612800 | 3.5444442  |
| H  | -2.4534637 | -2.8685253 | 2.5871330  |
| H  | -2.4593991 | -2.5051267 | 4.3173715  |
| C  | -4.8385290 | -0.8453003 | 1.5511863  |
| H  | -5.6080801 | -1.6072734 | 1.7260652  |
| H  | -5.3432952 | 0.1081434  | 1.3673719  |
| H  | -4.3028587 | -1.1188757 | 0.6360317  |
| Ge | 1.1442964  | -0.6642043 | -1.2489737 |
| Si | 0.2653249  | 1.8273920  | -0.6436344 |
| Ge | -1.3136375 | 0.1439500  | -1.1922768 |
| N  | 1.2253287  | 3.1189147  | -1.3132105 |
| N  | -2.4851941 | -0.2418105 | -2.6191409 |
| Si | 0.7177063  | 4.3068505  | -2.5315272 |
| C  | 2.4984385  | 3.3053281  | -0.6367856 |
| Si | -3.8402588 | 0.7897506  | -3.0458812 |
| C  | -2.2101662 | -1.4569064 | -3.3382547 |
| C  | -0.8560293 | 5.1637056  | -1.9651160 |
| C  | 2.0714332  | 5.5914236  | -2.7257762 |

|   |            |            |            |
|---|------------|------------|------------|
| C | 0.4081009  | 3.4118016  | -4.1493626 |
| C | 2.5521608  | 4.0808228  | 0.5443065  |
| C | 3.6615474  | 2.6928167  | -1.1570917 |
| C | -4.7952078 | -0.0227207 | -4.4437613 |
| C | -3.2297914 | 2.4878850  | -3.5707392 |
| C | -4.9570671 | 1.0395497  | -1.5540769 |
| C | -2.8481941 | -2.6600517 | -2.9544748 |
| C | -1.3222488 | -1.4472587 | -4.4407346 |
| H | -1.2534289 | 5.8069212  | -2.7599087 |
| H | -1.6378611 | 4.4451546  | -1.7013518 |
| H | -0.6718635 | 5.7889695  | -1.0851311 |
| H | 1.7682535  | 6.3215372  | -3.4870939 |
| H | 2.2500502  | 6.1344589  | -1.7929408 |
| H | 3.0255052  | 5.1572359  | -3.0362660 |
| H | 0.0048026  | 4.0910160  | -4.9099586 |
| H | 1.3294719  | 2.9687013  | -4.5403785 |
| H | -0.3165267 | 2.6043687  | -4.0079031 |
| C | 3.7949413  | 4.2787979  | 1.1548463  |
| C | 1.3140942  | 4.6907614  | 1.1848061  |
| C | 4.8796622  | 2.9279493  | -0.5106871 |
| C | 3.6321070  | 1.7835956  | -2.3768458 |
| H | -5.6161104 | 0.6318847  | -4.7623402 |
| H | -4.1608063 | -0.2170377 | -5.3142477 |
| H | -5.2278955 | -0.9796296 | -4.1361596 |
| H | -4.0678740 | 3.1817128  | -3.7116375 |
| H | -2.5780886 | 2.9105996  | -2.7984236 |
| H | -2.6589970 | 2.4537332  | -4.5037521 |
| H | -5.7216457 | 1.7984985  | -1.7620510 |
| H | -5.4682777 | 0.1152716  | -1.2665798 |
| H | -4.3786359 | 1.3820661  | -0.6883514 |
| C | -2.6514755 | -3.8086116 | -3.7270220 |
| C | -3.7059350 | -2.7451058 | -1.7042224 |
| C | -1.1554995 | -2.6208559 | -5.1826574 |
| C | -0.5672591 | -0.1944395 | -4.8499851 |
| H | 3.8489379  | 4.8763941  | 2.0611823  |
| C | 4.9547206  | 3.7206762  | 0.6296361  |
| H | 0.4419728  | 4.3577194  | 0.6133700  |
| C | 1.3471282  | 6.2293784  | 1.1431161  |
| C | 1.1296636  | 4.2086917  | 2.6327770  |
| H | 5.7829145  | 2.4701435  | -0.9042088 |
| H | 2.5838608  | 1.5371908  | -2.5762979 |
| C | 4.2064836  | 2.4759080  | -3.6265545 |
| C | 4.3850879  | 0.4663275  | -2.1245764 |
| H | -3.1513033 | -4.7313183 | -3.4417655 |
| C | -1.8257456 | -3.7920930 | -4.8458814 |
| H | -3.7640544 | -1.7353073 | -1.2875041 |
| C | -3.0347319 | -3.6516357 | -0.6583217 |
| C | -5.1380901 | -3.2240313 | -1.9909337 |
| H | -0.4880354 | -2.6143104 | -6.0403874 |
| H | -0.6862763 | 0.5296985  | -4.0374377 |
| C | -1.1593027 | 0.4202277  | -6.1311904 |
| C | 0.9365474  | -0.4550224 | -5.0350281 |
| H | 5.9114768  | 3.8879254  | 1.1166130  |
| H | 1.4268077  | 6.6060965  | 0.1193825  |
| H | 0.4342722  | 6.6394355  | 1.5899261  |
| H | 2.2029212  | 6.6139228  | 1.7092096  |
| H | 1.0724433  | 3.1168210  | 2.6797482  |
| H | 1.9612381  | 4.5329922  | 3.2683533  |
| H | 0.2029797  | 4.6111904  | 3.0515514  |
| H | 4.1806808  | 1.7914270  | -4.4821745 |
| H | 3.6410468  | 3.3729051  | -3.8916540 |
| H | 5.2483467  | 2.7718517  | -3.4586084 |
| H | 4.2267764  | -0.2215519 | -2.9619580 |
| H | 5.4638890  | 0.6343241  | -2.0286848 |
| H | 4.0343724  | -0.0279330 | -1.2148334 |
| H | -1.6881106 | -4.6917063 | -5.4394173 |
| H | -3.6229712 | -3.6789776 | 0.2657060  |
| H | -2.9361357 | -4.6772902 | -1.0307969 |
| H | -2.0315805 | -3.2827007 | -0.4173951 |

|   |            |            |            |
|---|------------|------------|------------|
| H | -5.7267300 | -3.2302009 | -1.0665387 |
| H | -5.6406131 | -2.5725903 | -2.7119245 |
| H | -5.1411394 | -4.2412108 | -2.3979676 |
| H | -0.6319772 | 1.3444896  | -6.3926425 |
| H | -1.0623157 | -0.2782824 | -6.9701342 |
| H | -2.2210167 | 0.6524179  | -6.0105043 |
| H | 1.4564266  | 0.4860655  | -5.2445206 |
| H | 1.3742870  | -0.8949180 | -4.1336046 |
| H | 1.1248162  | -1.1337343 | -5.8743029 |

## 9.2 Cartesian coordinates of the most stable isomers of mixed silicon germanium clusters with $\{N(SiH_3)CH_3\}$ substituents

### $Si_4Ge_2\{N(SiH_3)CH_3\}_4$

42

Energy = -6856.550918193 Hartree

|    |            |            |            |
|----|------------|------------|------------|
| Ge | 1.0327686  | 0.5430757  | -1.5407714 |
| Si | 0.7541642  | -1.9904201 | -0.5007549 |
| Si | 1.0773345  | -0.1971660 | 0.8785983  |
| Si | 3.4708962  | -3.3134745 | -0.6717935 |
| Si | 1.8516911  | 0.3160593  | 3.7584725  |
| N  | 1.8806335  | -3.0216430 | -1.3270225 |
| N  | 2.2437026  | 0.2908325  | 2.0640564  |
| C  | 1.5710590  | -3.5171976 | -2.6868798 |
| C  | 3.6152190  | 0.6550293  | 1.6426540  |
| Ge | -1.2570733 | -1.0093927 | -1.4286853 |
| Si | -0.8381123 | 1.5748477  | -0.4830275 |
| Si | -1.2390895 | -0.1499440 | 0.9240629  |
| N  | -1.7526737 | 2.9364696  | -1.0277635 |
| N  | -2.3986058 | -0.4576152 | 2.1765921  |
| Si | -3.2177814 | 3.4278160  | -0.2096273 |
| C  | -1.3467953 | 3.6748527  | -2.2456570 |
| Si | -2.6073187 | 0.6537263  | 3.4972547  |
| C  | -3.2168844 | -1.6906297 | 2.1444345  |
| H  | 0.5190208  | -3.3213349 | -2.9186569 |
| H  | 2.1854174  | -3.0078710 | -3.4392904 |
| H  | 1.7489355  | -4.5966449 | -2.7551977 |
| H  | 3.7730144  | -4.7690484 | -0.6908385 |
| H  | 4.5209066  | -2.6219388 | -1.4666166 |
| H  | 3.4794454  | -2.8010519 | 0.7180406  |
| H  | 0.4634793  | -0.1819681 | 3.8973501  |
| H  | 2.7813090  | -0.5527799 | 4.5298424  |
| H  | 1.9577235  | 1.6904362  | 4.3171770  |
| H  | 3.8871076  | 1.6479466  | 2.0212516  |
| H  | 4.3479454  | -0.0742643 | 2.0091174  |
| H  | 3.6714189  | 0.6813470  | 0.5496675  |
| H  | -1.6712396 | 1.7803782  | 3.2736520  |
| H  | -4.0075180 | 1.1544994  | 3.5518769  |
| H  | -2.3171298 | 0.0052355  | 4.8044953  |
| H  | -0.4098988 | 3.2604586  | -2.6315040 |
| H  | -2.1108530 | 3.5844754  | -3.0267275 |
| H  | -1.1931182 | 4.7371235  | -2.0226675 |
| H  | -3.1149347 | 4.8441813  | 0.2297236  |
| H  | -4.3846514 | 3.3177322  | -1.1236669 |
| H  | -3.3964297 | 2.5369332  | 0.9582013  |
| H  | -2.9697187 | -2.3512429 | 2.9847291  |
| H  | -4.2858838 | -1.4484169 | 2.1912400  |
| H  | -3.0302254 | -2.2340670 | 1.2129953  |

# Si<sub>3</sub>Ge<sub>3</sub>{N(SiH<sub>3</sub>)CH<sub>3</sub>}<sub>4</sub>

42

Energy = -8644.008645231 Hartree

|    |            |            |            |
|----|------------|------------|------------|
| Ge | 0.8576120  | 0.0222886  | 1.6426595  |
| Ge | 0.3628207  | 2.4165329  | 0.1972595  |
| Si | 0.7554739  | 0.3074277  | -0.8704180 |
| Si | 3.3031605  | 3.4049150  | 0.4949329  |
| Si | 1.4695496  | -0.6579666 | -3.6438678 |
| N  | 1.6706300  | 3.4455049  | 1.0706501  |
| N  | 1.9110141  | -0.3263196 | -1.9927128 |
| C  | 1.3683320  | 3.9516906  | 2.4200930  |
| C  | 3.3000191  | -0.5944045 | -1.5550002 |
| Ge | -1.5773954 | 1.2451092  | 1.3770114  |
| Si | -0.8111815 | -1.3532050 | 0.6687120  |
| Si | -1.5687913 | 0.1343562  | -0.8524026 |
| N  | -1.2573698 | -2.9474080 | 1.1535376  |
| N  | -2.7490434 | 0.0566542  | -2.1189949 |
| Si | -2.6056067 | -3.7755488 | 0.4056892  |
| C  | -0.5160873 | -3.6503968 | 2.2266167  |
| Si | -2.8334140 | -1.2960509 | -3.2091503 |
| C  | -3.6743648 | 1.1950397  | -2.3225869 |
| H  | 0.2656969  | -2.9950923 | 2.6229769  |
| H  | -1.1906850 | -3.9229983 | 3.0463084  |
| H  | -0.0436228 | -4.5613223 | 1.8404062  |
| H  | -2.1444539 | -4.9611722 | -0.3627384 |
| H  | -3.5418390 | -4.2471769 | 1.4587995  |
| H  | -3.2810707 | -2.8148738 | -0.4935441 |
| H  | -1.7605372 | -2.2425267 | -2.8241009 |
| H  | -4.1585080 | -1.9677403 | -3.1292710 |
| H  | -2.6416285 | -0.8562553 | -4.6170925 |
| H  | -3.5058521 | 1.6708716  | -3.2964775 |
| H  | -4.7179404 | 0.8615816  | -2.2697005 |
| H  | -3.5167703 | 1.9451935  | -1.5412760 |
| H  | 0.2836101  | 4.0253474  | 2.5598746  |
| H  | 1.7594615  | 3.2845528  | 3.2011203  |
| H  | 1.7984179  | 4.9505842  | 2.5655091  |
| H  | 3.9244529  | 4.7557717  | 0.5685190  |
| H  | 4.1725258  | 2.4765440  | 1.2735252  |
| H  | 3.2587299  | 2.9403911  | -0.9142510 |
| H  | 3.4128196  | -0.3268129 | -0.4996722 |
| H  | 3.5471269  | -1.6572165 | -1.6675848 |
| H  | 4.0139878  | -0.0017100 | -2.1388758 |
| H  | 2.3966151  | 0.0340372  | -4.5783271 |
| H  | 1.5306582  | -2.1135094 | -3.9438583 |
| H  | 0.0862286  | -0.1639402 | -3.8361254 |



## Si<sub>2</sub>Ge<sub>4</sub>{N(SiH<sub>3</sub>)CH<sub>3</sub>}<sub>4</sub>

42

Energy = -10431.46006112 Hartree

|    |            |            |            |
|----|------------|------------|------------|
| Ge | 1.4701329  | 0.5528377  | 1.2349105  |
| Ge | 0.4131678  | -1.9850564 | 0.4875562  |
| Si | -0.9312464 | -0.1682834 | 1.1656306  |
| Si | 0.5873325  | -4.1049503 | 2.7727127  |
| Si | -3.7646546 | -0.5567712 | 2.1191871  |
| N  | 1.2716985  | -3.3985580 | 1.3408397  |
| N  | -2.1570457 | 0.0662120  | 2.3650715  |
| C  | 2.5746839  | -3.8642629 | 0.8324033  |
| C  | -1.8195136 | 0.6770104  | 3.6707601  |
| Ge | 1.4290621  | -0.5662376 | -1.2928541 |
| Ge | 0.3891087  | 1.9686960  | -0.5070793 |
| Si | -0.9697622 | 0.1492844  | -1.1458055 |
| N  | 1.2039205  | 3.3997735  | -1.3730345 |
| N  | -2.2348196 | -0.0845646 | -2.3039672 |
| Si | 0.4630961  | 4.1150463  | -2.7722536 |
| C  | 2.5179546  | 3.8748627  | -0.9031328 |
| Si | -3.8322214 | 0.5422145  | -2.0066501 |
| C  | -1.9414255 | -0.6967139 | -3.6196645 |
| H  | -4.2121849 | 1.5221850  | -3.0592409 |
| H  | -4.8503520 | -0.5410754 | -2.0076314 |
| H  | -3.7977443 | 1.2085138  | -0.6836905 |
| H  | 0.2515959  | 5.5767338  | -2.5867135 |
| H  | 1.3073555  | 3.9400832  | -3.9856866 |
| H  | -0.8405349 | 3.4354948  | -2.9663360 |
| H  | -4.1129912 | -1.5357648 | 3.1835039  |
| H  | -4.7797091 | 0.5288809  | 2.1525769  |
| H  | -3.7740376 | -1.2231566 | 0.7958478  |
| H  | 0.3847569  | -5.5708034 | 2.6114967  |
| H  | 1.4711283  | -3.9072436 | 3.9540972  |
| H  | -0.7159072 | -3.4364136 | 3.0043323  |
| H  | 2.8349617  | -3.3217412 | -0.0830188 |
| H  | 3.3696355  | -3.6848598 | 1.5679476  |
| H  | 2.5484890  | -4.9367935 | 0.6012457  |
| H  | 2.8148272  | 3.3252359  | -0.0032520 |
| H  | 3.2896154  | 3.7129469  | -1.6669861 |
| H  | 2.4874635  | 4.9443853  | -0.6589585 |
| H  | -0.8995854 | -1.0307339 | -3.6471741 |
| H  | -2.5856741 | -1.5670419 | -3.7930113 |
| H  | -2.0953873 | 0.0230230  | -4.4330548 |
| H  | -0.7767491 | 1.0092577  | 3.6641273  |
| H  | -2.4561988 | 1.5483384  | 3.8657285  |
| H  | -1.9478187 | -0.0429901 | 4.4883406  |

# Si<sub>6</sub>{N(SiH<sub>3</sub>)CH<sub>3</sub>}<sub>4</sub>

42

Energy = -3281.588214406 Hartree

|    |            |            |            |
|----|------------|------------|------------|
| Si | 1.0275316  | 0.5903401  | -1.3996232 |
| Si | 0.7866177  | -1.8918225 | -0.4885007 |
| Si | 1.1088482  | -0.1300545 | 0.9388431  |
| Si | 3.4135722  | -3.3777138 | -0.6759634 |
| Si | 1.9289096  | 0.2890458  | 3.8216677  |
| N  | 1.8512719  | -2.9659476 | -1.3349960 |
| N  | 2.2866452  | 0.3376769  | 2.1199010  |
| C  | 1.5208886  | -3.4083987 | -2.7090164 |
| C  | 3.6453652  | 0.7352435  | 1.6857739  |
| Si | -1.1678449 | -0.9131014 | -1.3265626 |
| Si | -0.8360115 | 1.5873116  | -0.4588934 |
| Si | -1.2029434 | -0.1286321 | 0.9760053  |
| N  | -1.7583314 | 2.9108004  | -1.0741384 |
| N  | -2.3853674 | -0.4777510 | 2.1937695  |
| Si | -3.2194174 | 3.4368169  | -0.2713045 |
| C  | -1.3732621 | 3.5683485  | -2.3444540 |
| Si | -2.5987502 | 0.5843540  | 3.5542183  |
| C  | -3.2346779 | -1.6855184 | 2.0860796  |
| H  | 0.4866128  | -3.1369529 | -2.9430179 |
| H  | 2.1757455  | -2.9239080 | -3.4432125 |
| H  | 1.6271535  | -4.4954771 | -2.8006011 |
| H  | 3.6071664  | -4.8514107 | -0.6957159 |
| H  | 4.5122954  | -2.7645370 | -1.4686104 |
| H  | 3.4538128  | -2.8686527 | 0.7146581  |
| H  | 0.5429377  | -0.2140071 | 3.9657237  |
| H  | 2.8715115  | -0.6117722 | 4.5383956  |
| H  | 2.0482326  | 1.6394526  | 4.4333285  |
| H  | 3.9200372  | 1.7066585  | 2.1144678  |
| H  | 4.3916426  | -0.0081481 | 1.9916196  |
| H  | 3.6736242  | 0.8247611  | 0.5951815  |
| H  | -1.6425274 | 1.7036252  | 3.3850420  |
| H  | -3.9918820 | 1.1043082  | 3.6055008  |
| H  | -2.3371327 | -0.1172571 | 4.8396192  |
| H  | -0.4249235 | 3.1532314  | -2.6997222 |
| H  | -2.1342563 | 3.3983834  | -3.1151541 |
| H  | -1.2506173 | 4.6479407  | -2.1996579 |
| H  | -3.1367587 | 4.8861730  | 0.0476574  |
| H  | -4.4031707 | 3.2286055  | -1.1454614 |
| H  | -3.3534902 | 2.6408605  | 0.9693607  |
| H  | -3.0319395 | -2.3842756 | 2.9070990  |
| H  | -4.2979080 | -1.4163614 | 2.1088419  |
| H  | -3.0319530 | -2.1968951 | 1.1401879  |

# Ge<sub>6</sub>{N(SiH<sub>3</sub>)CH<sub>3</sub>}<sub>4</sub>

42

Energy = -14006.36171674 Hartree

|    |            |            |            |
|----|------------|------------|------------|
| Ge | 1.4754214  | 0.5528144  | 1.2060113  |
| Ge | 0.4036549  | -2.0181201 | 0.4969654  |
| Ge | -1.0121307 | -0.1728753 | 1.2469566  |
| Si | 0.7176858  | -4.1021024 | 2.7980908  |
| Si | -3.9162379 | -0.5553860 | 2.3027148  |
| N  | 1.3627285  | -3.3532045 | 1.3678060  |
| N  | -2.3056804 | 0.0325987  | 2.5621145  |
| C  | 2.7106588  | -3.7109307 | 0.8892857  |
| C  | -1.9065015 | 0.5900924  | 3.8680012  |
| Ge | 1.4342646  | -0.5753941 | -1.2674219 |
| Ge | 0.3791477  | 1.9925855  | -0.5176020 |
| Ge | -1.0529735 | 0.1460723  | -1.2278491 |
| N  | 1.2909452  | 3.3509467  | -1.4018806 |
| N  | -2.3914815 | -0.0532433 | -2.4983290 |
| Si | 0.5892600  | 4.1082295  | -2.8010202 |
| C  | 2.6463001  | 3.7266295  | -0.9592805 |
| Si | -3.9864000 | 0.5524317  | -2.1883592 |
| C  | -2.0406273 | -0.6178493 | -3.8149717 |
| H  | -4.3690031 | 1.6041748  | -3.1707710 |
| H  | -5.0097384 | -0.5250761 | -2.2717980 |
| H  | -3.9674672 | 1.1279052  | -0.8223098 |
| H  | 0.4993628  | 5.5833862  | -2.6272042 |
| H  | 1.4024678  | 3.8521343  | -4.0209123 |
| H  | -0.7658032 | 3.5306950  | -2.9694207 |
| H  | -4.2782037 | -1.6039672 | 3.2961898  |
| H  | -4.9248144 | 0.5328563  | 2.4197089  |
| H  | -3.9472645 | -1.1294826 | 0.9363042  |
| H  | 0.6484080  | -5.5809691 | 2.6478834  |
| H  | 1.5625073  | -3.8144930 | 3.9891773  |
| H  | -0.6416207 | -3.5454534 | 2.9998917  |
| H  | 2.9310847  | -3.1801217 | -0.0432866 |
| H  | 3.4756137  | -3.4311228 | 1.6252186  |
| H  | 2.7871933  | -4.7887663 | 0.6979013  |
| H  | 2.9050295  | 3.1861888  | -0.0422659 |
| H  | 3.3929037  | 3.4721712  | -1.7227333 |
| H  | 2.7091316  | 4.8027422  | -0.7537795 |
| H  | -1.0108469 | -0.9904534 | -3.8037612 |
| H  | -2.7001468 | -1.4588462 | -4.0651305 |
| H  | -2.1209231 | 0.1367121  | -4.6085944 |
| H  | -0.8737736 | 0.9520015  | 3.8242090  |
| H  | -2.5487079 | 1.4372441  | 4.1414077  |
| H  | -1.9690001 | -0.1657560 | 4.6619644  |

## 10. References

- [S1] a) P. v. d. Sluis, A. L. Spek, *Acta Crystallogr., Sect. A: Found. Crystallogr.* **1990**, *46*, 194–201; b) A. L. Spek, *Acta Cryst.* **2015**, *C71*, 9–18.
